# Supplementary material
Source: PubMed Central journal article supplement (PMC10332476)

## Supplementary data on Chen et al., Nature Methods XXX: XXX (2010)

### Overview

Page I: this page

Page II: Notes + vectors

Page III: The layout tables of the Y2H plates of the following pages

Page IV: How to read these plates

Pages 01-20: all **Y2H tests of the Positive Reference Set (PRS)**

Pages 21-40: all **Y2H tests of the Random Reference Set (RRS)**

Pages 41-60: **all activation tests of the PRS**

Pages 61-80: **all activation tests of the RRS**

The order of protein pairs on bait and prey plates corresponds to that used by Braun et al. which were used as provided by Pascal Braun.

The order of protein pairs in Figure 1 and Supplementary Table 1 is different. It is based on the results by Braun et al.

## Notes

All screens were done twice (see, e.g. pages 1-2) on 3 different 3AT concentrations (0, 3, 10 mM) as quadruplicate colonies. There are a few differences between the screen sets (e.g. p. 2-3, position G1). If the position was clearly positive in one of the two replicate sets, we counted them as positive. If the position was weak but above background or had only 2-4 colonies in both replicates, it was counted positive. If it was questionable in one case and negative in the other replicate it was counted negative. In a few cases, individual clones turned out to be missing and were replaced later as indicated on the screen pages.

## Autoactivators

It turns out that quite a few of the baits tested in this study do autoactivate our Y2H reporter gene. If an activation test is positive with an empty prey vector we did not count these "positives" as positive but as negative although, technically, they may not be counted at all. We will discuss this problem in more detail in a forthcoming paper.

## Vectors used in the project:

| Vector  | Promoter | Gal4-Fusion |            | Selection |            |         | Source       |
|---------|----------|-------------|------------|-----------|------------|---------|--------------|
|         |          | DBD         | AD         | yeast     | bacterial  | ori     |              |
| pDEST22 | fl-ADH1  | -           | N-terminal | Trp1      | Ampicillin | CEN     | Invitrogen   |
| pDEST32 | fl-ADH1  | N-terminal  | -          | Leu2      | Gentamycin | CEN     | Invitrogen   |
| pGBKT7g | t-ADH1   | N-terminal  | -          | Trp1      | Kanamycin  | 2 $\mu$ | [1]          |
| pGBGT7g | t-ADH1   | N-terminal  | -          | Trp1      | Gentamycin | 2 $\mu$ | [this study] |
| pGADT7g | fl-ADH1  | -           | N-terminal | Leu2      | Ampicillin | 2 $\mu$ | [1]          |
| pGBKCg  | t-ADH1   | C-terminal  | -          | Trp1      | Kanamycin  | 2 $\mu$ | [2]          |
| pGADCg  | fl-ADH1  | -           | C-terminal | Leu2      | Ampicillin | 2 $\mu$ | [2]          |

## References:

- 1 Rajagopala S.V.; Titz B. & Uetz P. (2007) In: Yeast Gene Analysis 2nd Edition. Methods in Microbiology Series, Vol 36, Edited by Mike Stark and Ian Stansfield, Elsevier, 139-163
- 2 Stellberger T. et al., Proteome Sci. 2010 Feb 15;8:8

### PRS-Bait\_plate layout

|   | 1      | 2       | 3      | 4      | 5       | 6       | 7        | 8     | 9     | 10     | 11    | 12     |
|---|--------|---------|--------|--------|---------|---------|----------|-------|-------|--------|-------|--------|
| A | LCP2   | FABP5   | TRAF6  | S100A6 | GRAP2   | LCP2    | LSM3     | PTK2  | IFIT1 | PSMD4  | MCM2  | BAK1   |
| B | ORC2L  | NR3C1   | CDK2   | BAD    | HIF1A   | PRKAR2A | CCND3    | BDNF  | FGF1  | MAD2L1 | JUNB  | DDIT3  |
| C | CXCL1  | MAFG    | NR3C1  | HDAC1  | ATF3    | LGALS3  | FEN1     | AKT1  | IGF2  | PEX19  | NCBP1 | FANCA  |
| D | CDKN1A | SKP1A   | CBBL   | CHC1   | GRB2    | NF2     | CEBPG    | MAPK7 | BIRC4 | S100A1 | RAF1  | LCP2   |
| E | PTPN11 | GADD45A | LMNA   | GRB2   | FANCA   | HDAC1   | PDGFRB   | RIPK2 | PEX14 | ARF1   | LMNA  | PEX19  |
| F | RPA2   | RET     | BIRC4  | RHOA   | ARHGAP1 | BIRC4   | PEX19    | TP53  | AKT1  | B2M    | CD2   | B2M    |
| G | CRK    | SKP1A   | RAC1   | ERBB3  | GRB2    | CASP2   | TNFRSF10 | CGA   | SMAD3 | PDE4D  | SMAD4 | PPP3CA |
| H | CDKN1B | SMAD1   | GTF2F1 | MCM2   | DR1     | HBA2    | ORC2L    | B2M   |       |        |       |        |

### PRS-Prey\_plate layout

|   | 1      | 2      | 3      | 4       | 5     | 6        | 7         | 8      | 9      | 10     | 11    | 12     |
|---|--------|--------|--------|---------|-------|----------|-----------|--------|--------|--------|-------|--------|
| A | NCK1   | S100A7 | TAB3   | S100B   | LAT   | GRAP2    | LSM2      | SRC    | EIF356 | RAD23A | MCM3  | BCL2L1 |
| B | MCM10  | RELA   | CKS1B  | BCL2L1  | TP53  | VIL2     | CDK6      | NTF5   | FGFR1  | MAD1L1 | BATF  | FOS    |
| C | IL8RB  | NFE2L1 | HSPCA  | ZBTB16  | DDIT3 | LGALS3BP | PCNA      | TCL1A  | IGFBP4 | PEX11B | NCBP2 | FANCG  |
| D | CCNA1  | SKP2   | GRB2   | RAN     | PTK2  | HGS      | FOS       | MAP2K5 | CASP3  | S100B  | RAP1A | VAV1   |
| E | FRS2   | PCNA   | LMNB1  | VAV1    | FANCC | RB1      | PTPN11    | CARD4  | PEX19  | ARFIP2 | RB1   | PEX3   |
| F | RPA3   | FRS2   | CASP9  | ARHGAP1 | BNIP2 | CASP7    | PEX16     | UBE2I  | PDPK1  | HLA-A  | CD58  | HLA-C  |
| G | PDGFRB | BTRC   | ARFIP2 | NRG1    | LAT   | CRADD    | TNFRSF10B | CGB5   | SMAD4  | GNB2L1 | DCP1A | PPP3R1 |
| H | CCNA1  | SMAD4  | GTF2F2 | MCM5    | DRAP1 | HBB      | ORC4L     | HLA-B  |        |        |       |        |

### RRS-Bait\_plate layout

|   | 1     | 2      | 3      | 4        | 5       | 6      | 7       | 8      | 9       | 10       | 11       | 12       |
|---|-------|--------|--------|----------|---------|--------|---------|--------|---------|----------|----------|----------|
| A | HNRPM | SHMT2  | EMD    | PDHB     | FKBP3   | RAB3B  | GALK1   | GPD2   | PSMD5   | PPP6C    | CD81     | BTC      |
| B | CD151 | PDE9A  | CANX   | GCDH     | GRIK2   | RGR    | LAMP2   | OSM    | MNAT1   | FABP7    | BAD      | SERPINB3 |
| C | HCLS1 | P2RY6  | FIGF   | ITPK1    | PROS1   | PDGFRA | HLA-DMB | SLC6A1 | PPP1R1A | NONO     | GABRA2   | ETF1     |
| D | FABP4 | APOD   | ASS    | ARSA     | SLC25A6 | CA2    | CHC1    | JAK3   | CENPA   | HLA-DQB1 | PML      | NFIB     |
| E | RXRβ  | LUM    | COPB   | PPP1R12B | INPP1   | ITPA   | DLX4    | RHOC   | CANX    | DUT      | MYBL2    | NAT2     |
| F | DEFA1 | PSMD12 | SCARB1 | MOBP     | PSMD5   | CLPTM1 | FAS     | PMCH   | CD34    | NDP      | HIST1H1C | HMGGB1   |
| G | MX2   | RFX3   | NKX2-5 | NT5E     | BMP5    | CNN1   | COPB    | MCM2   | GPR18   | PFDN2    | MAOB     | ACVR1    |
| H | NUDT2 | RBM3   | GP1BA  | PBX2     | ATP5O   | BYSL   | CKB     | ERBB3  |         |          |          |          |

### RRS-Prey\_plate layout

|   | 1        | 2        | 3         | 4      | 5         | 6        | 7      | 8            | 9         | 10       | 11       | 12       |
|---|----------|----------|-----------|--------|-----------|----------|--------|--------------|-----------|----------|----------|----------|
| A | TNFRSF10 | STAC3    | ARMC1     | ZC3HC1 | NQO2      | BOC      | MCCC1  | FLJ21125     | SLC22A15  | ZNF350   | NPC2     | KIAA0515 |
| B | WDR41    | FLJ38964 | ATAD2     | ZCCHC9 | ARL6IP6   | ABCF3    | UBE2G2 | LOC146542    | GMPPA     | STX5A    | FGF18    | DCTN6    |
| C | SALL2    | TRIM26   | ZNF46     | TMEM22 | STK25     | NDFIP1   | PSEN2  | TM4SF4       | MGC33692  | VMD2     | PSTPIP2  | LIMR     |
| D | GCG      | MUC7     | FLJ13912  | DBN1   | ZNF213    | PTPRS    | KLHL6  | ATP6V1D      | PPIL3     | ATO7H    | SGKL     | TIRAP    |
| E | CXCL11   | UGCG12   | SLC39A14  | ZNF307 | MGC10067  | C19orf14 | RAB3IP | FLJ20130     | ARHGFE15  | MGC32020 | FLJ10094 | DNAJA1   |
| F | C9orf97  | CRIP1    | PHF21B    | MRPS25 | C10orf94  | L3MBTL2  | LSM3   | RIC3         | C20orf161 | NUDT4    | NPDC1    | TEAD4    |
| G | NUP37    | SEMA4G   | GALNACT-2 | TAB3   | C10orf119 | FRAG1    | HPCAL4 | DKFZp434G062 | HNRPLL    | ZNF440   | CTCF     | CWF19L1  |
| H | FLJ12438 | SF3A1    | PVRL2     | VILL   | CLEC2D    | KIAA0907 | HBZ    | MGC26717     |           |          |          |          |

# How to read the raw data

1. Images contain the raw Y2H data, e.g. pages 1 + 41

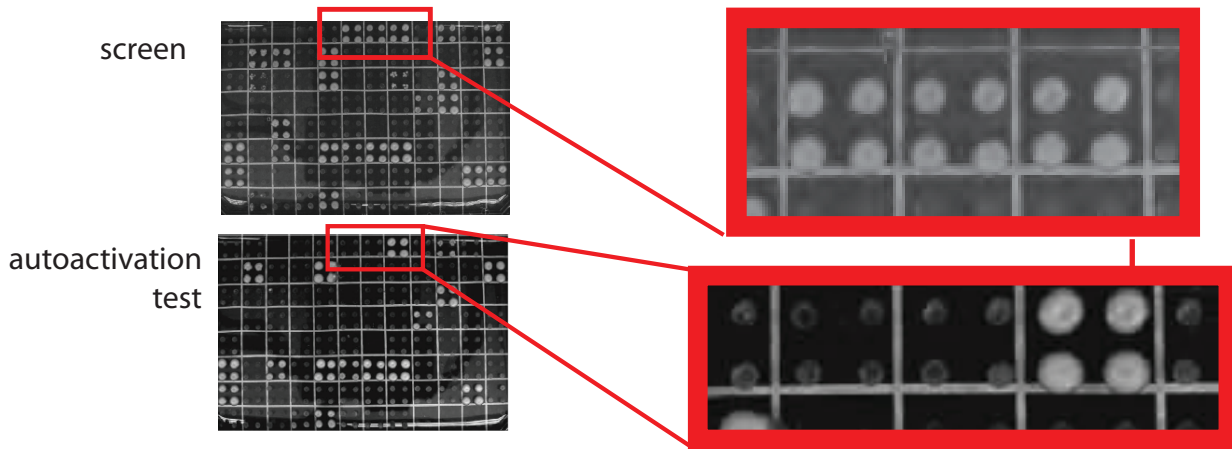

2. Their identity can be found on the (bait and plate) plate layout tables (page 2)

PRS-Bait\_plate layout

|   | 1      | 2       | 3      | 4      | 5       | 6      | 7       | 8     | 9     | 10     | 11    | 12     |
|---|--------|---------|--------|--------|---------|--------|---------|-------|-------|--------|-------|--------|
| A | LCP2   | FABP5   | TRAF6  | S100A6 | GRAP2   | LCP2   | LSM3    | PTK2  | IFIT1 | PSMD4  | MCM2  | BAK1   |
| B | ORC2L  | NR3C1   | CDK2   | BAD    | HIF1A   |        |         |       | FGF1  | MAD2L1 | JUNB  | DDIT3  |
| C | CXCL1  | MAFG    | NR3C1  | HDAC1  | ATF3    | LGALS3 | FEN1    | AKT1  | IGF2  | PEX19  | NCBP1 | FANCA  |
| D | CDKN1A | SKP1A   | CBLB   | CHC1   | GRB2    | NF2    | CEBPG   | MAPK7 | BIRC4 | S100A1 | RAF1  | LCP2   |
| E | PTPN11 | GADD45A | LMNA   | GRB2   | FANCA   | HDAC1  | PDGFRB  | RIPK2 | PEX14 | ARF1   | LMNA  | PEX19  |
| F | RPA2   | RET     | BIRC4  | RHOA   | ARHGAP1 | BIRC4  | PEX19   | TP53  | AKT1  | B2M    | CD2   | B2M    |
| G | CRK    | SKP1A   | RAC1   | ERBB3  | GRB2    | CASP2  | NFYSF10 | CGA   | SMAD3 | PDE4D  | SMAD4 | PPP3CA |
| H | CDKN1B | SMAD1   | GTF2F1 | MCM2   | DR1     | HBA2   | ORC2L   | B2M   |       |        |       |        |

PRS-Prey\_plate layout

|   | 1      | 2      | 3      | 4       | 5     | 6        | 7         | 8      | 9      | 10     | 11    | 12     |
|---|--------|--------|--------|---------|-------|----------|-----------|--------|--------|--------|-------|--------|
| A | NCK1   | S100A7 | TAB3   | S100B   | LAT   | GRAP2    | LSM2      | SRC    | EIF356 | RAD23A | MCM3  | BCL2L1 |
| B | MCM10  | RELA   | CKS1B  | BCL2L1  | TP53  | VIL2     | CDK6      | NTF5   | FGFR1  | MAD1L1 | BATF  | FOS    |
| C | IL8RB  | NFE2L1 | HSPCA  | ZBTB16  | DDIT3 | LGALS3BP | PCNA      | TCL1A  | IGFBP4 | PEX11B | NCBP2 | FANCG  |
| D | CCNA1  | SKP2   | GRB2   | RAN     | PTK2  | HGS      | FOS       | MAP2K5 | CASP3  | S100B  | RAP1A | VAV1   |
| E | FRS2   | PCNA   | LMNB1  | VAV1    | FANCC | RB1      | PTPN11    | CARD4  | PEX19  | ARFIP2 | RB1   | PEX3   |
| F | RPA3   | FRS2   | CASP9  | ARHGAP1 | BNIP2 | CASP7    | PEX16     | UBE2I  | PDPK1  | HLA-A  | CD58  | HLA-C  |
| G | PDGFRB | BTRC   | ARFIP2 | NRG1    | LAT   | CRADD    | TNFRSF10B | CGB5   | SMAD4  | GNB2L1 | DCP1A | PPP3R1 |
| H | CCNA1  | SMAD4  | GTF2F2 | MCM5    | DRAP1 | HBB      | ORC4L     | HLA-B  |        |        |       |        |

3. Find these interactions in the Figure or supplementary table

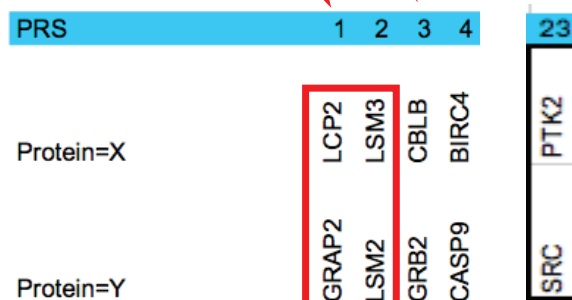

4. Note that GRAP2-LCP2 and LSM2-LSM3 are positive but SRC-PTK2 are not because PTK2 is autoactivating as a bait.

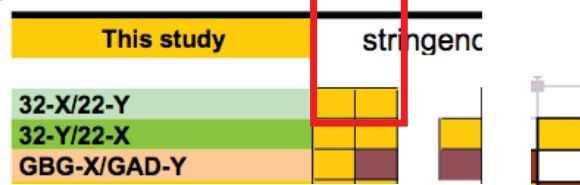

Positive reference set

Baits: pDEST32

Preys: pDEST22

0 mM 3AT

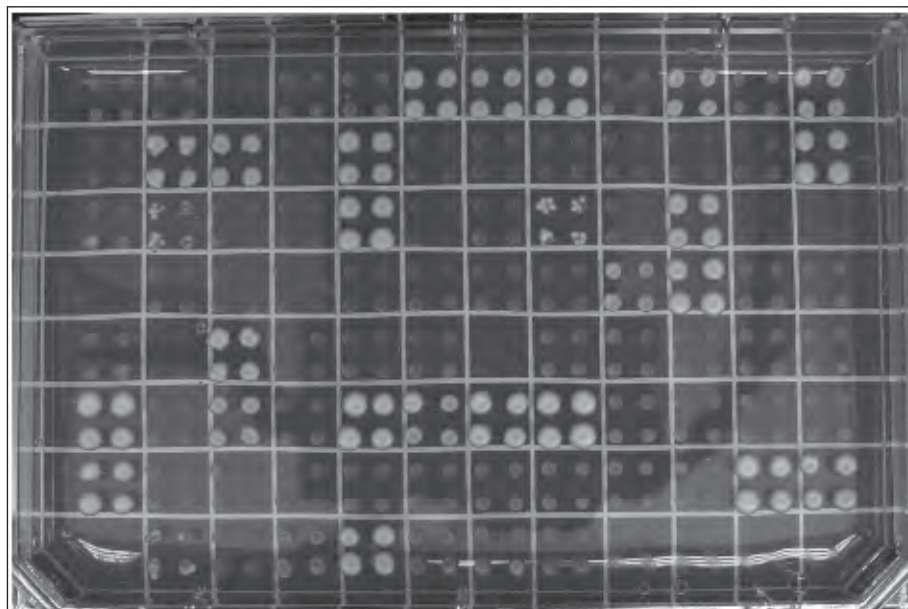

3 mM 3AT

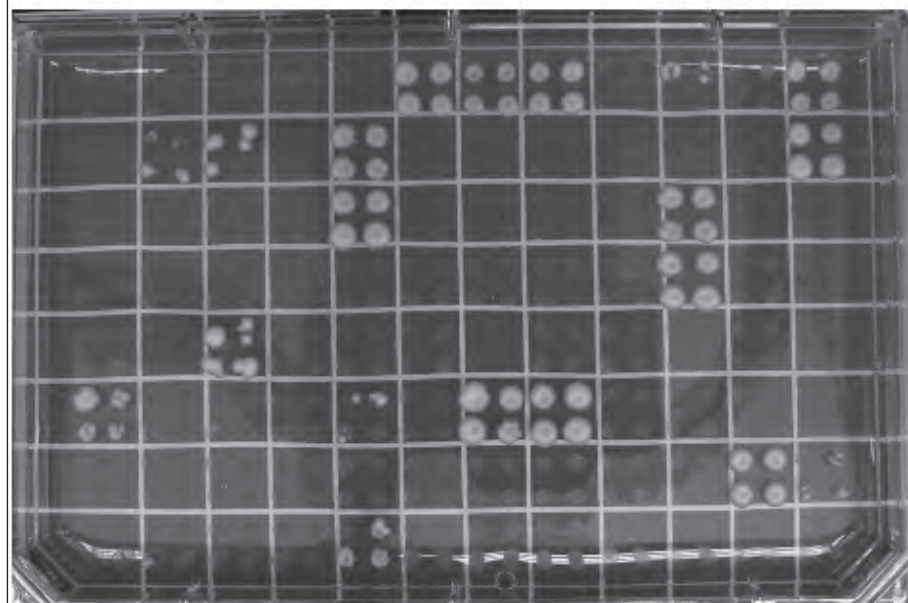

10 mM 3AT

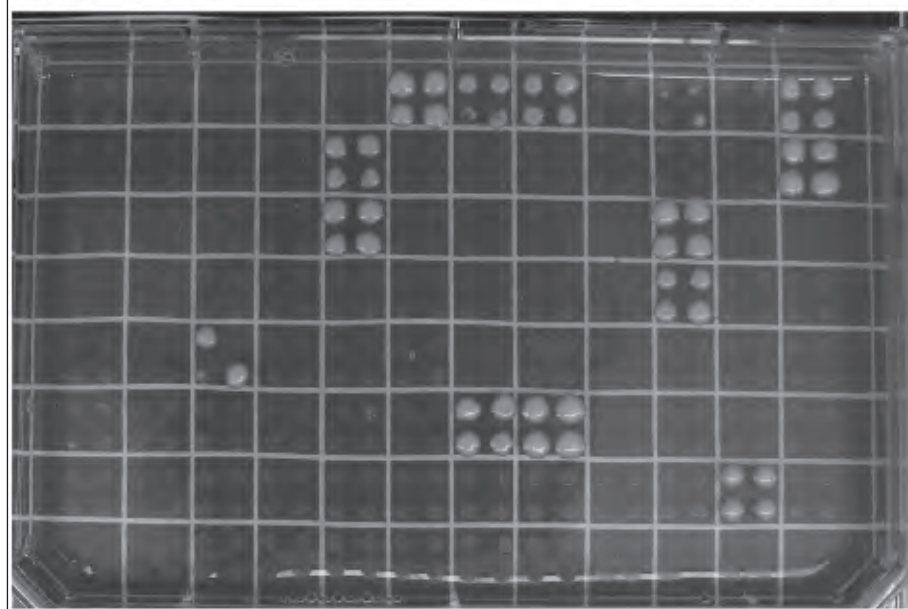

Note: C11 were missing in this array, but recoverd in the other array. Data not shown

Positive reference set

Baits: pDEST32

Preys: pDEST22

0 mM 3AT

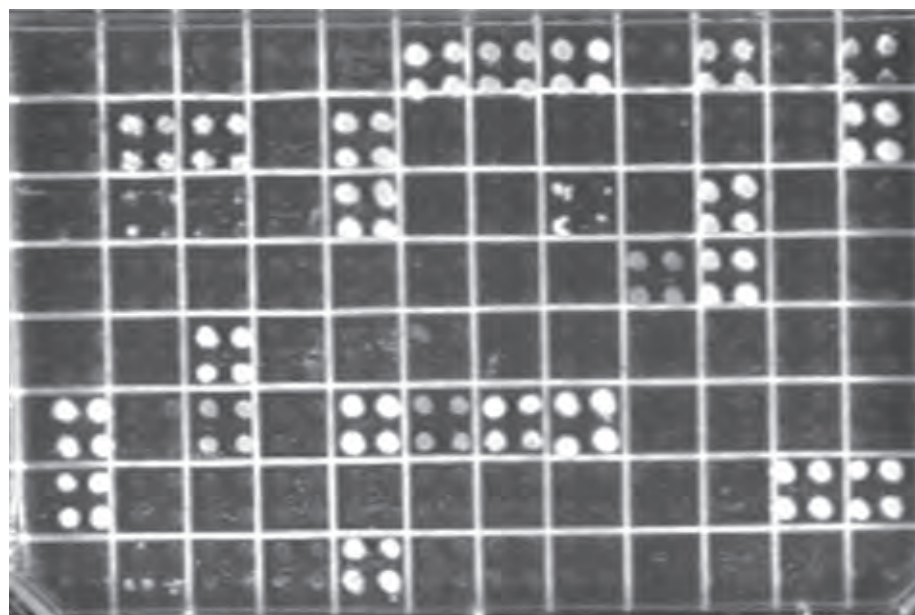

3 mM 3AT

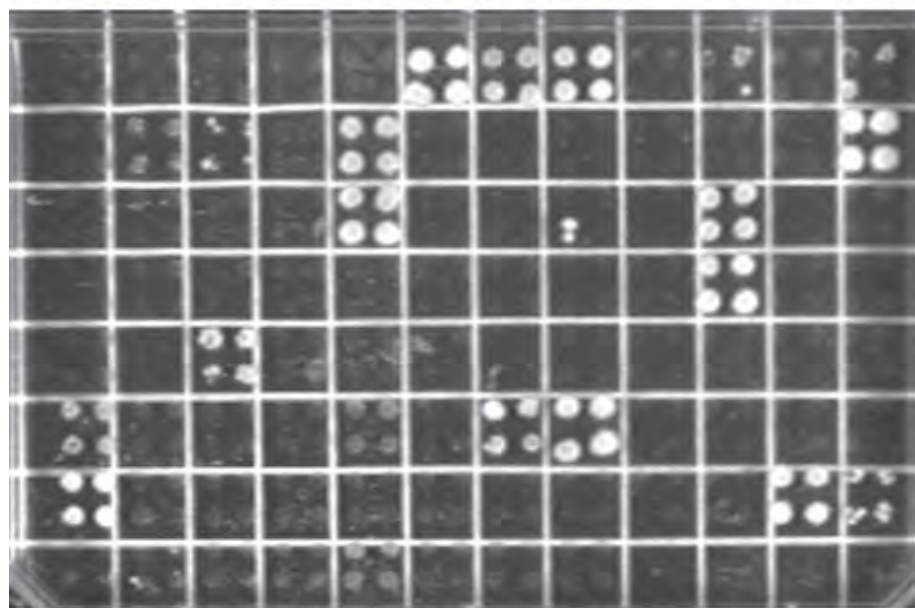

10 mM 3AT

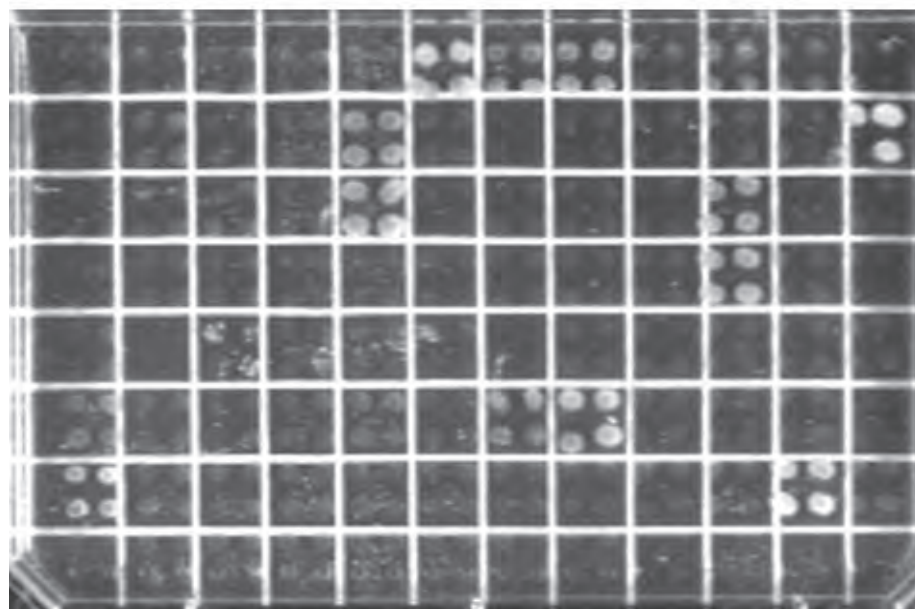

Note: C11 were missing in this array, but recoverd in the other array. Data not shown

Positive reference set

Baits: pDEST22

Preys: pDEST32

0 mM 3AT

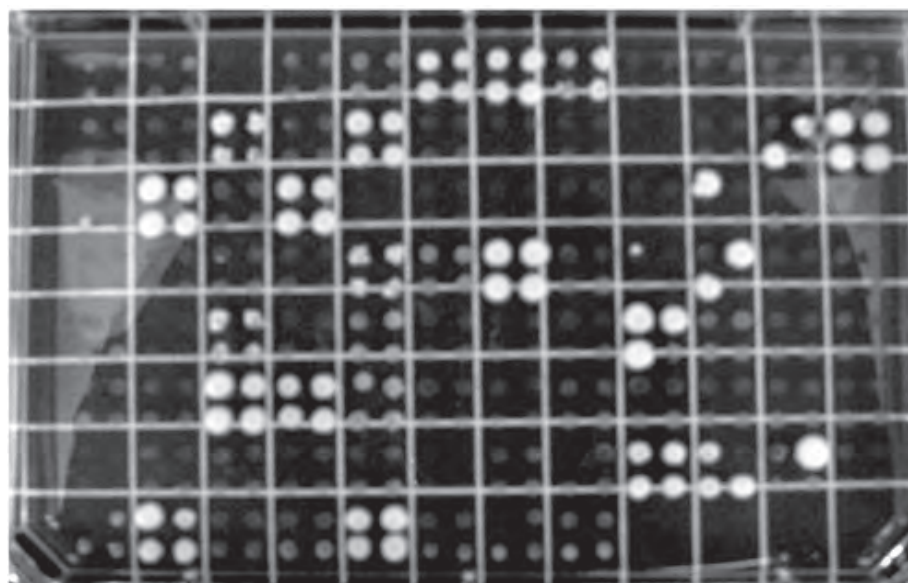

3 mM 3AT

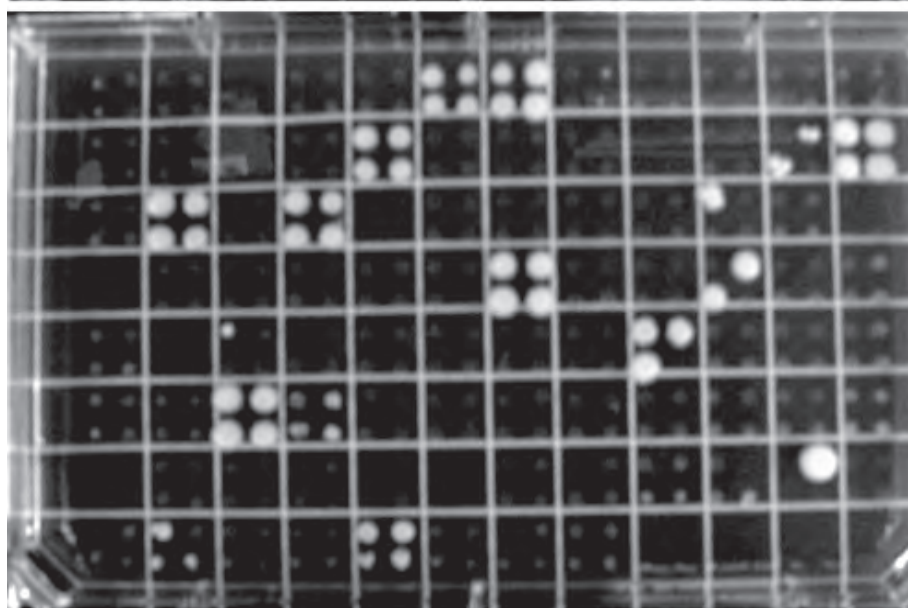

10 mM 3AT

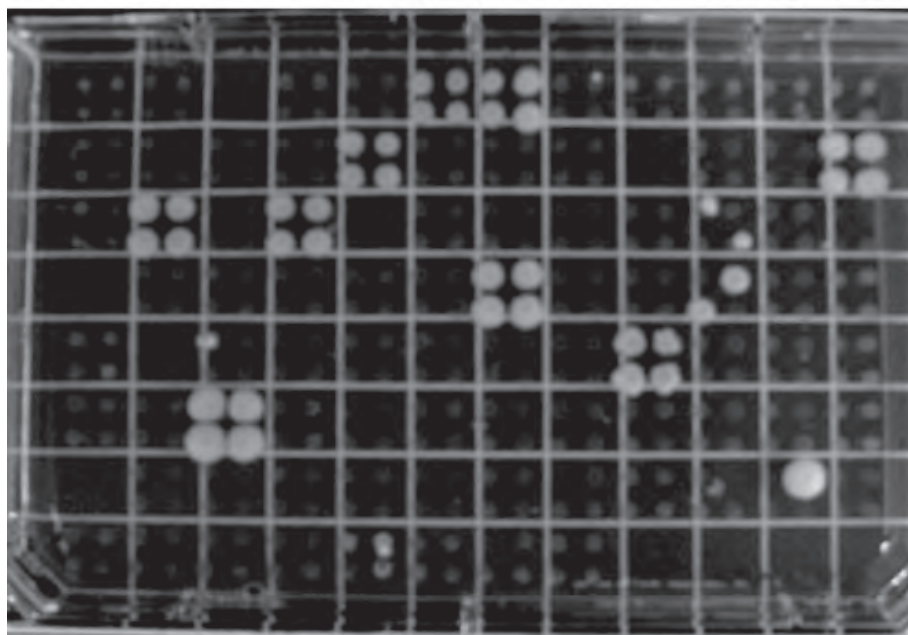

Note: A3, E7 were missing in this array, but recoverd in the other array. Data not shown

Positive reference set

Baits: pDEST22

Preys: pDEST32

0 mM 3AT

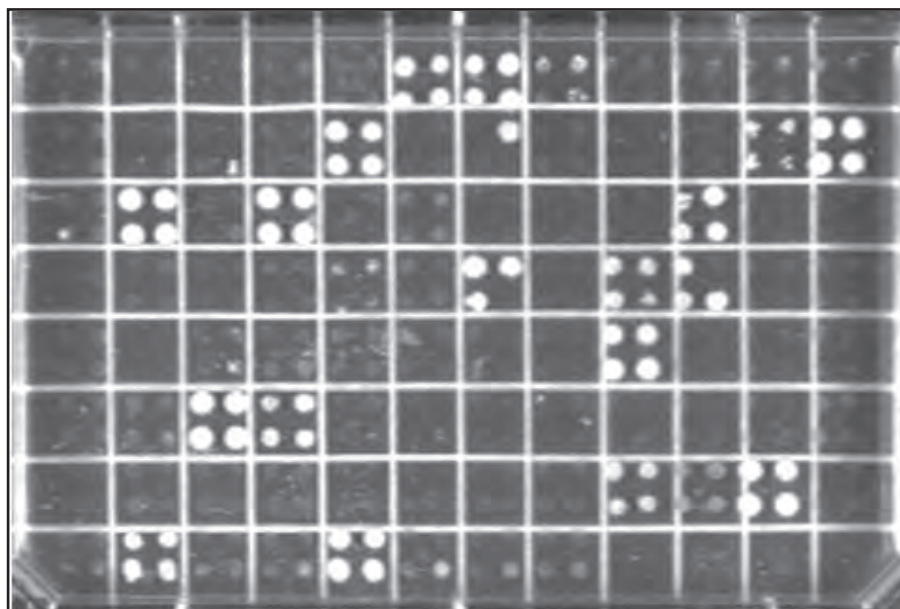

3 mM 3AT

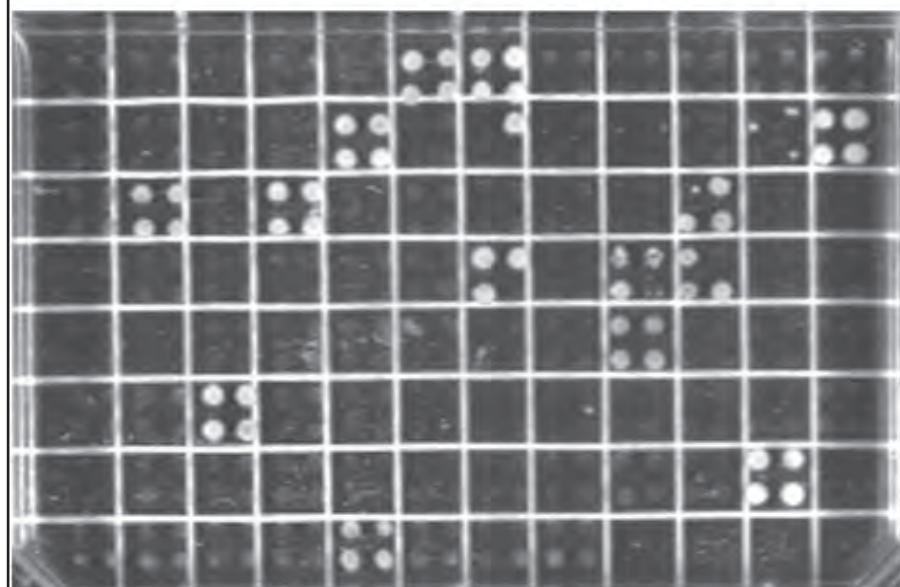

10 mM 3AT

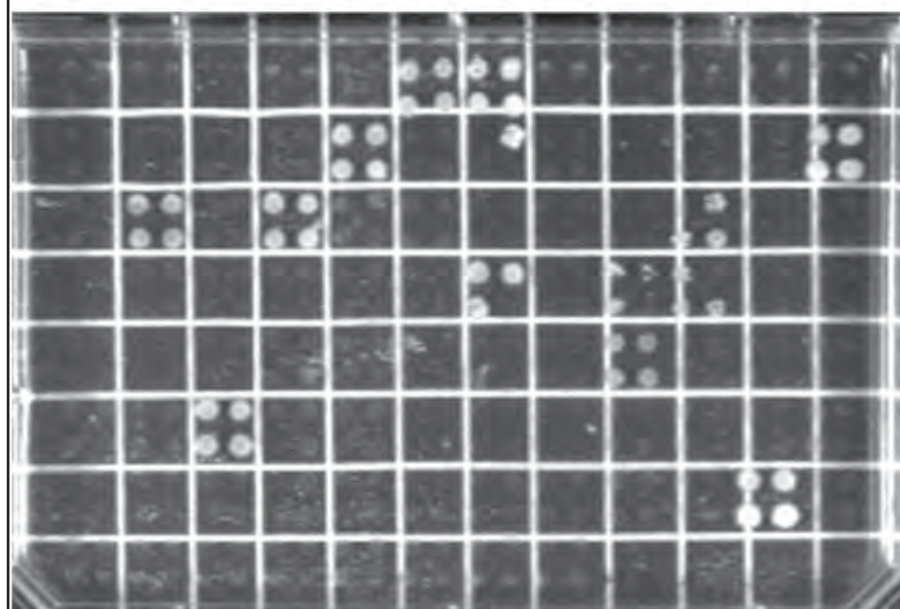

Note: A3, E7 were missing in this array, but recovered in the other array. Data not shown



Positive reference set

Baits: pGBT7g

Preys: pGADT7g

0 mM 3AT

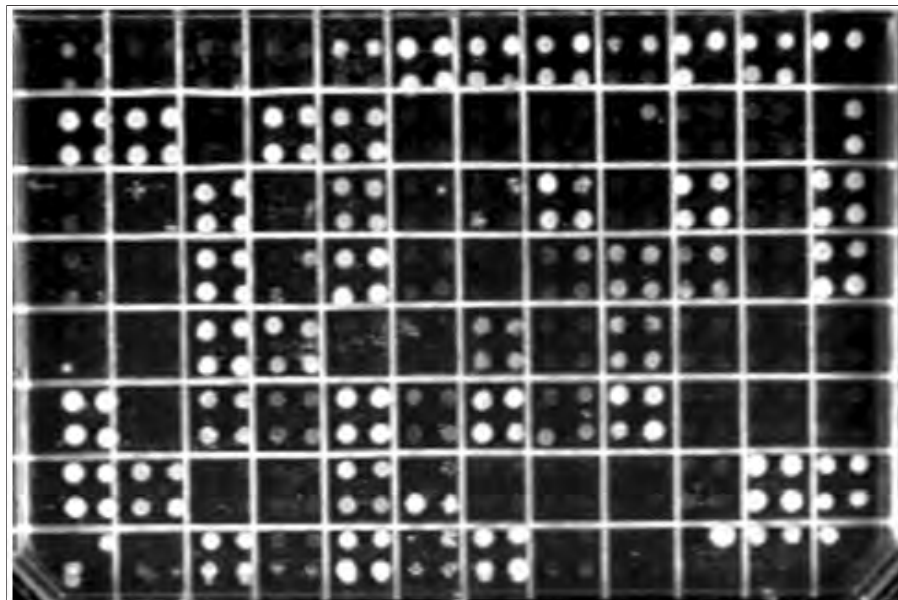

3 mM 3AT

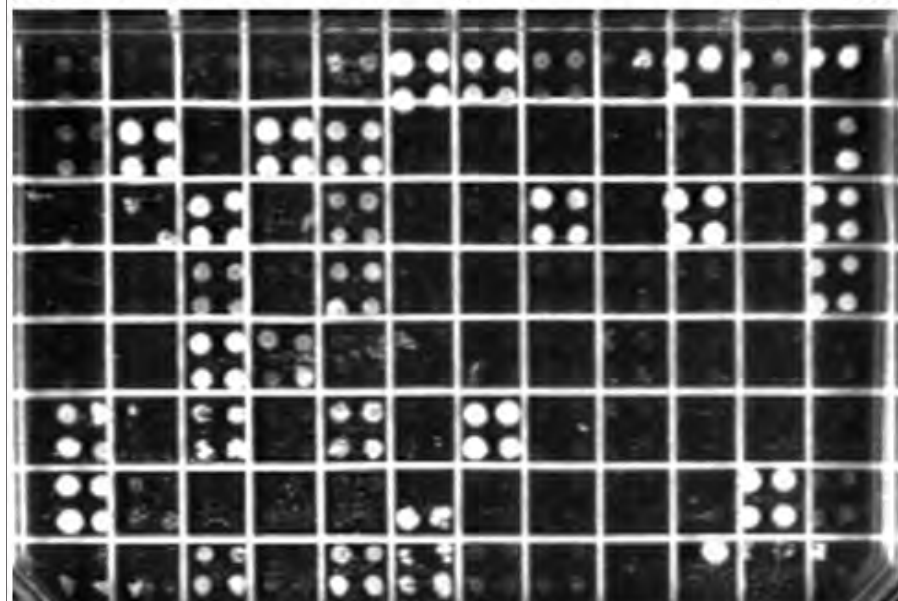

10 mM 3AT

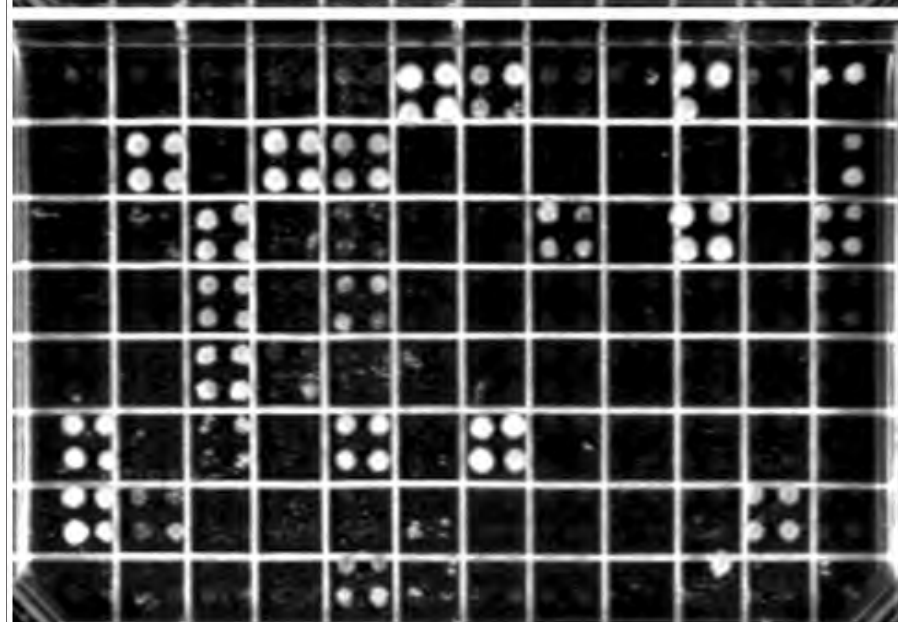

Positive reference set  
Baits: pGBGT7g  
Preys: pGADT7g

0 mM 3AT

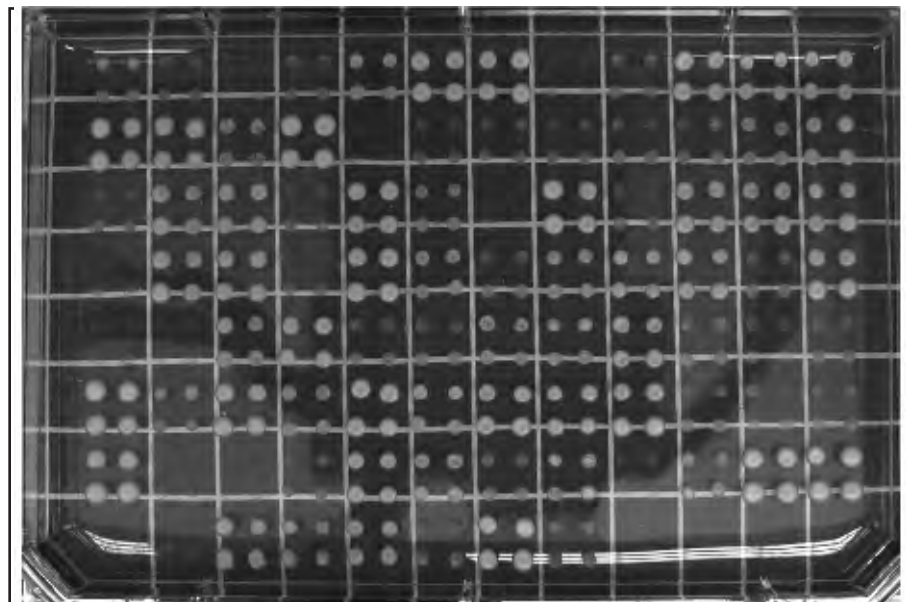

3 mM 3AT

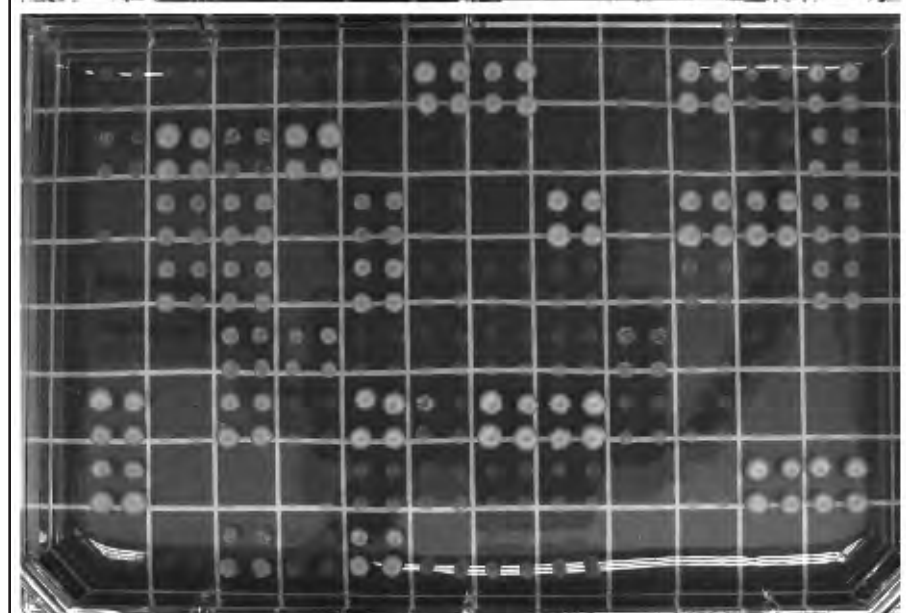

10 mM 3AT

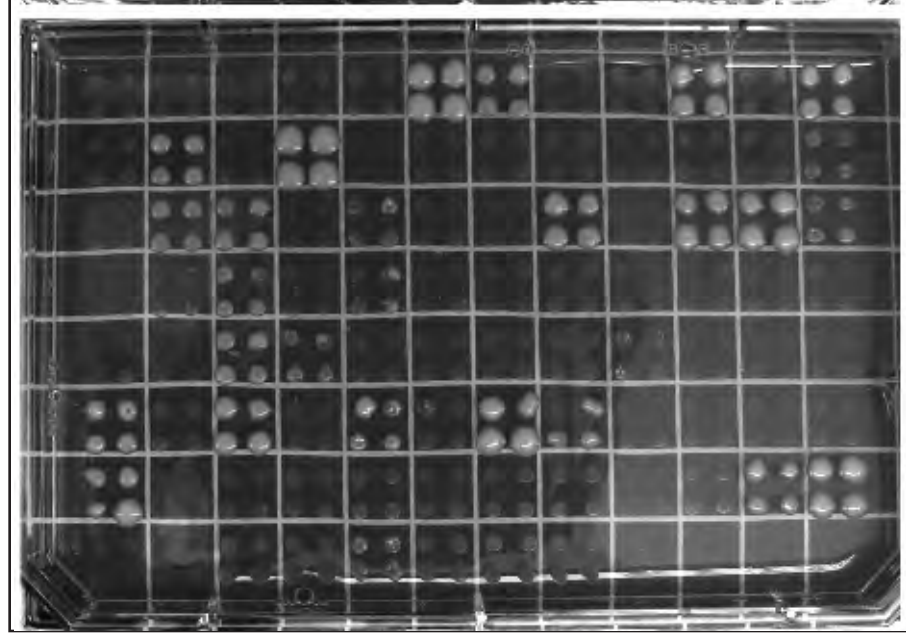

Positive reference set  
Baits: pGADT7g  
Preys: pGBGT7g

0 mM 3AT

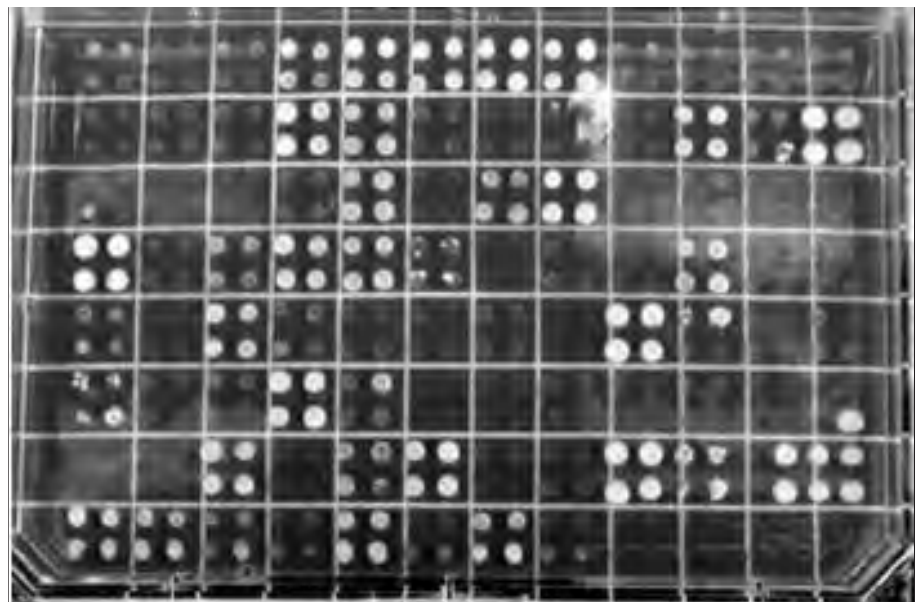

3 mM 3AT

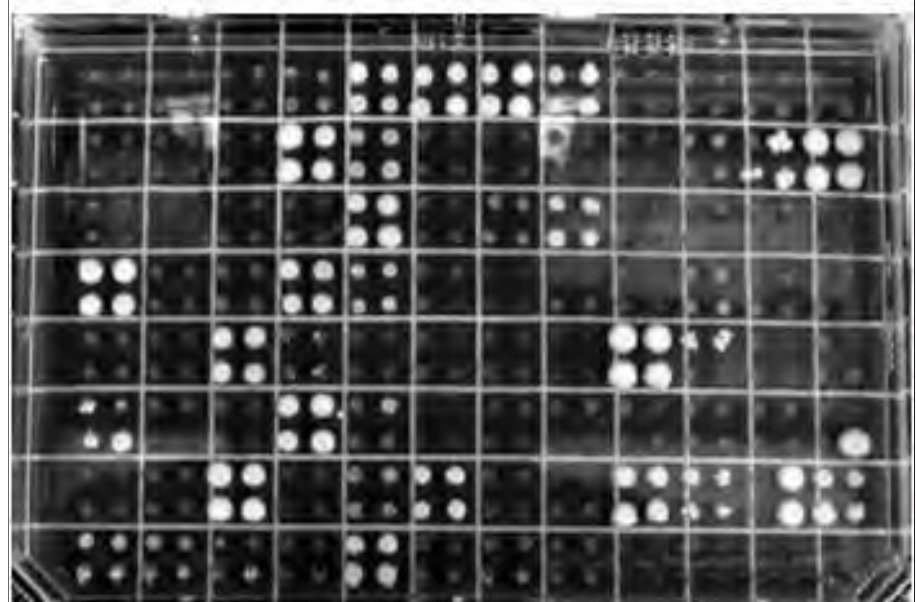

10 mM 3AT

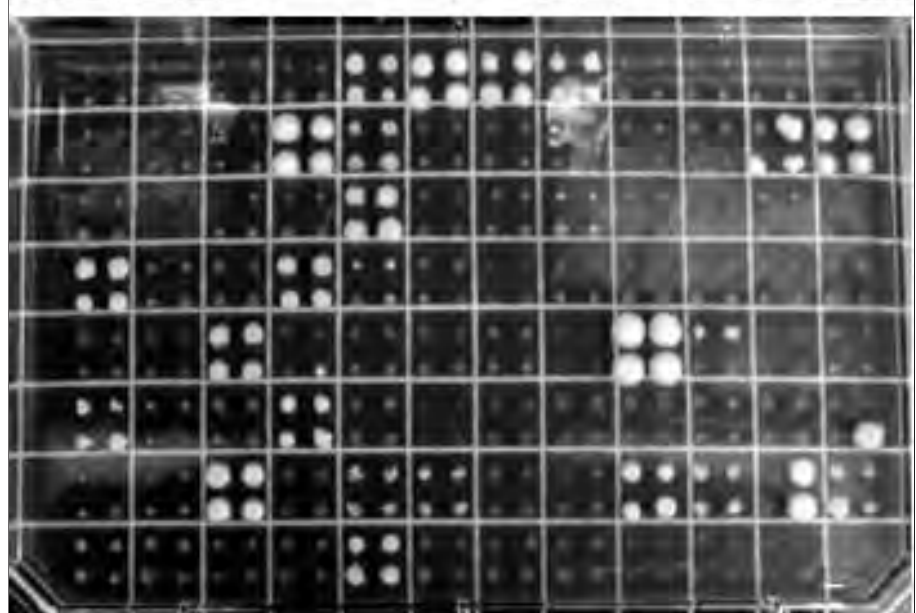

Positive reference set  
Baits: pGADT7g  
Preys: pGBGT7g

0 mM 3AT

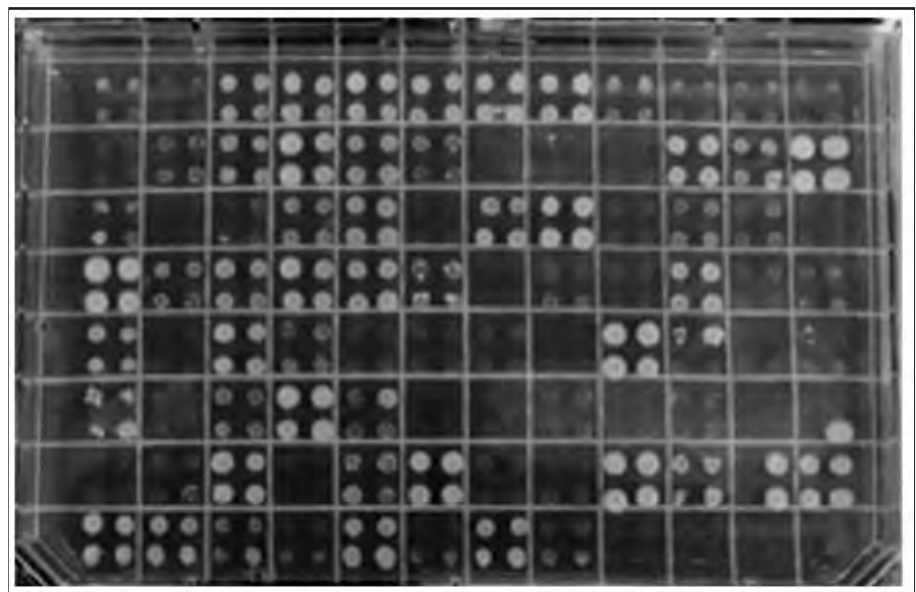

3 mM 3AT

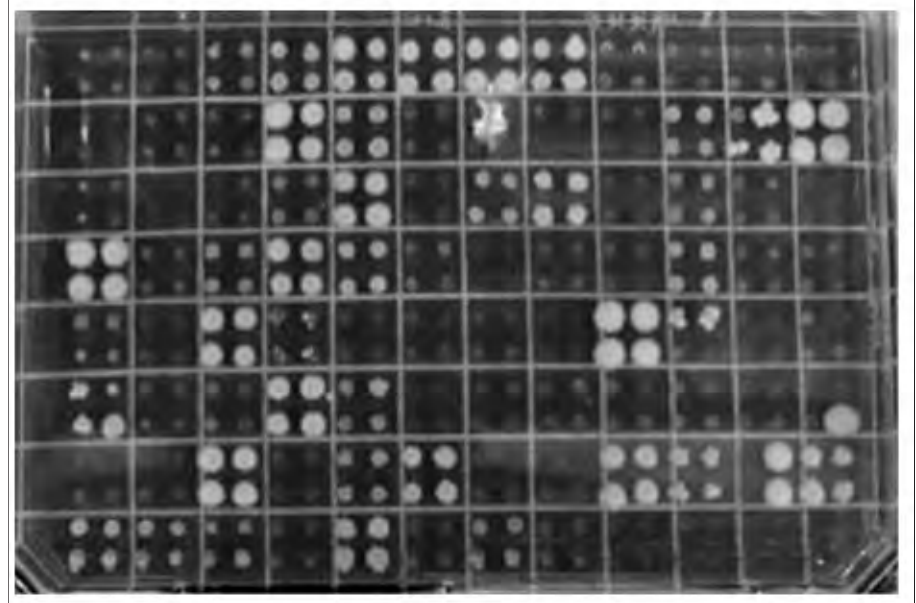

10 mM 3AT

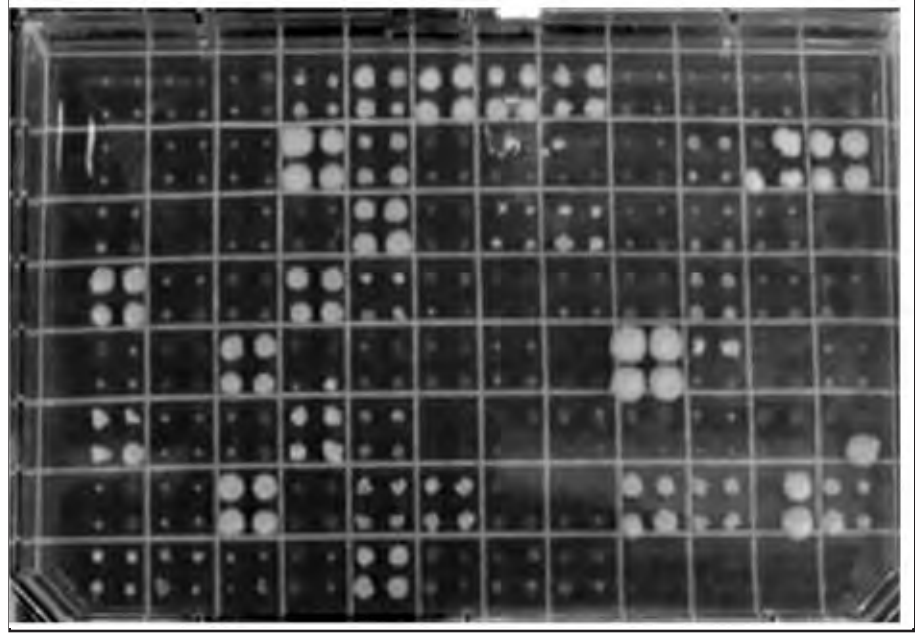

Positive reference set  
Baits: pGBKCg  
Preys: pGADCg

0 mM 3AT

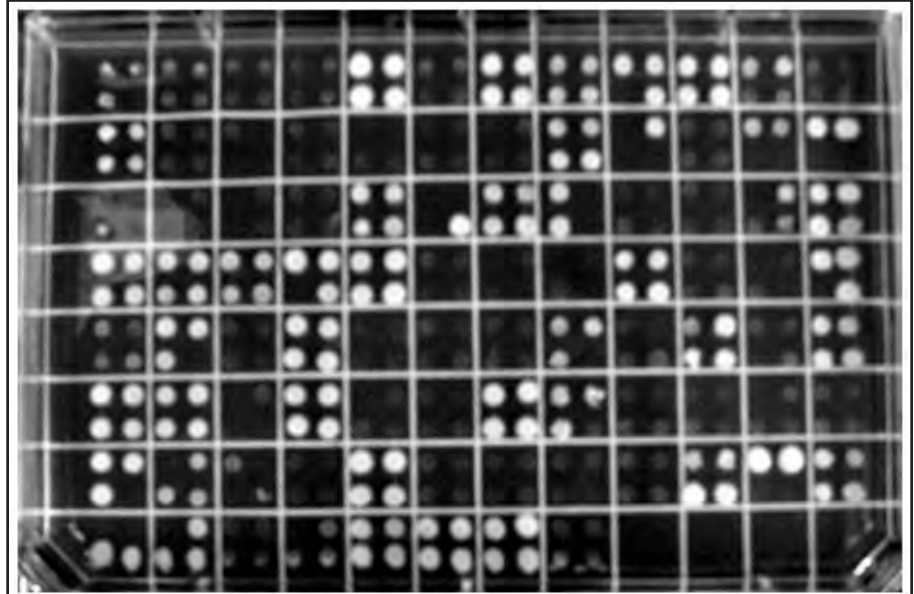

3 mM 3AT

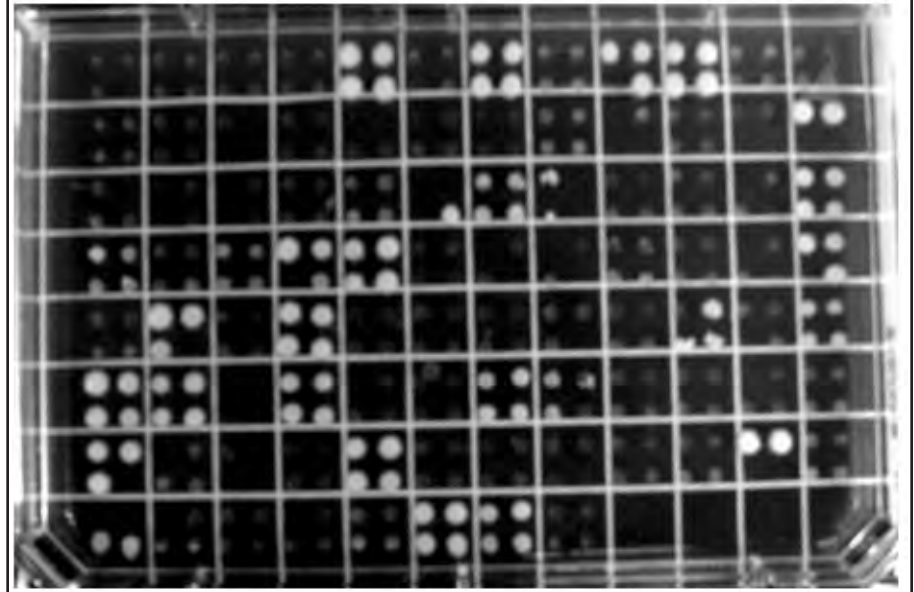

10 mM 3AT

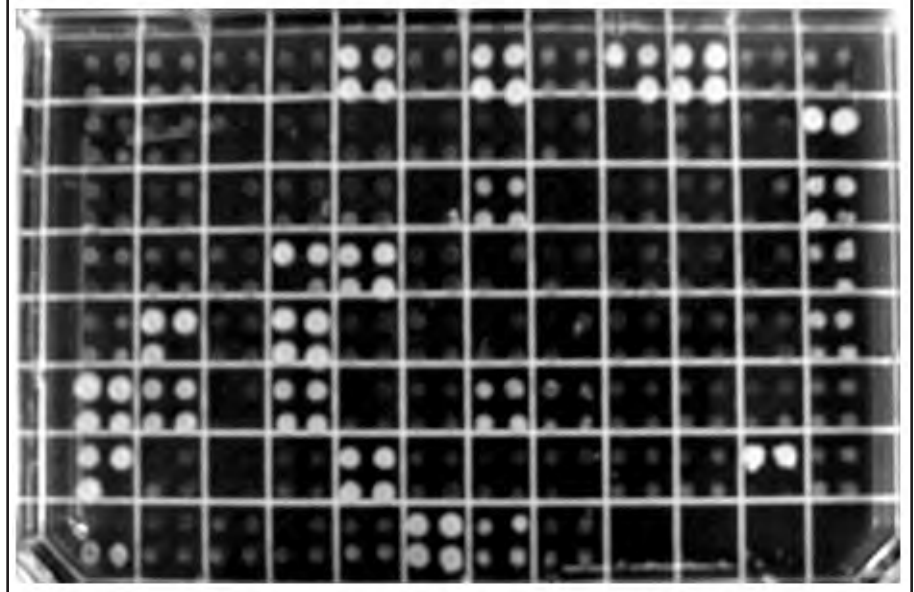

Positive reference set

Baits: pGBKCg

Preys: pGADCg

0 mM 3AT

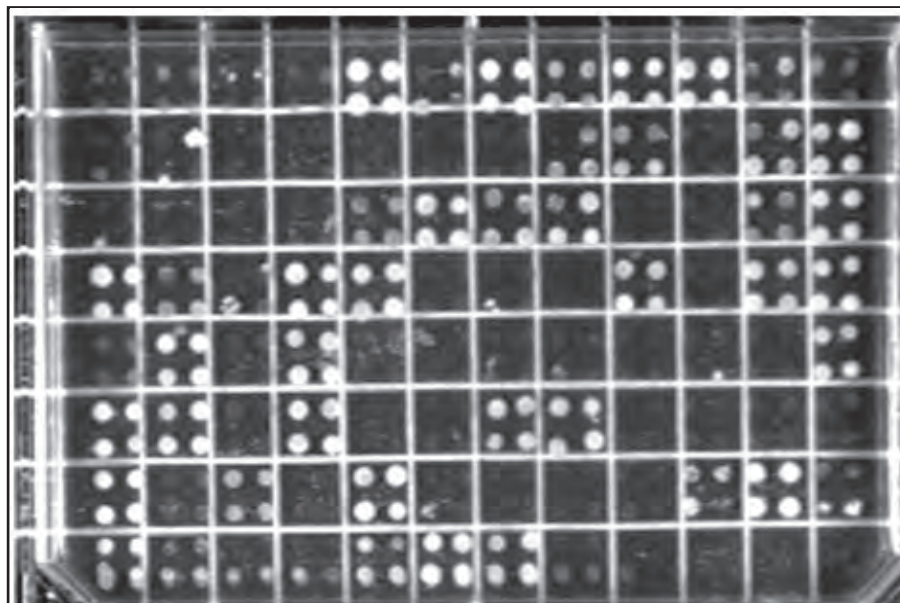

3 mM 3AT

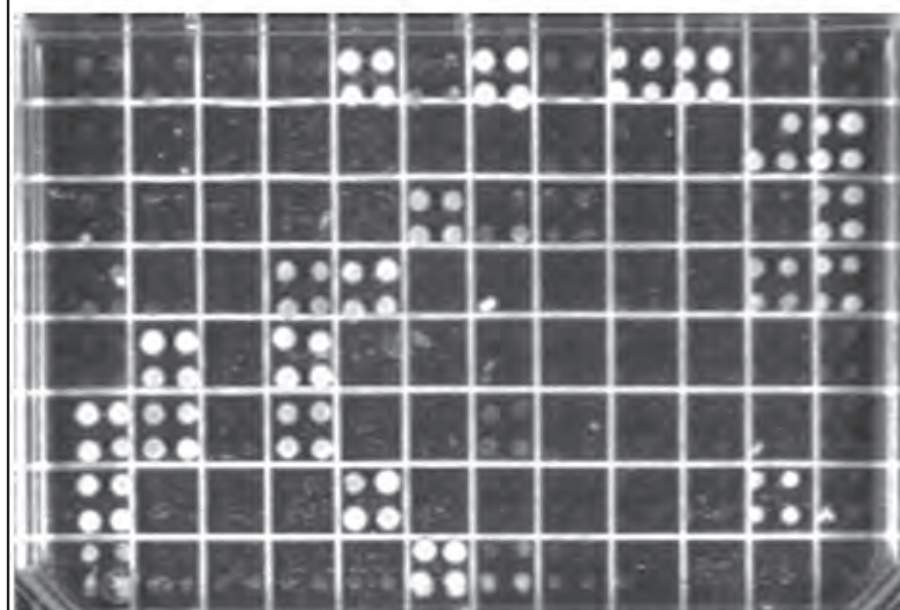

10 mM 3AT

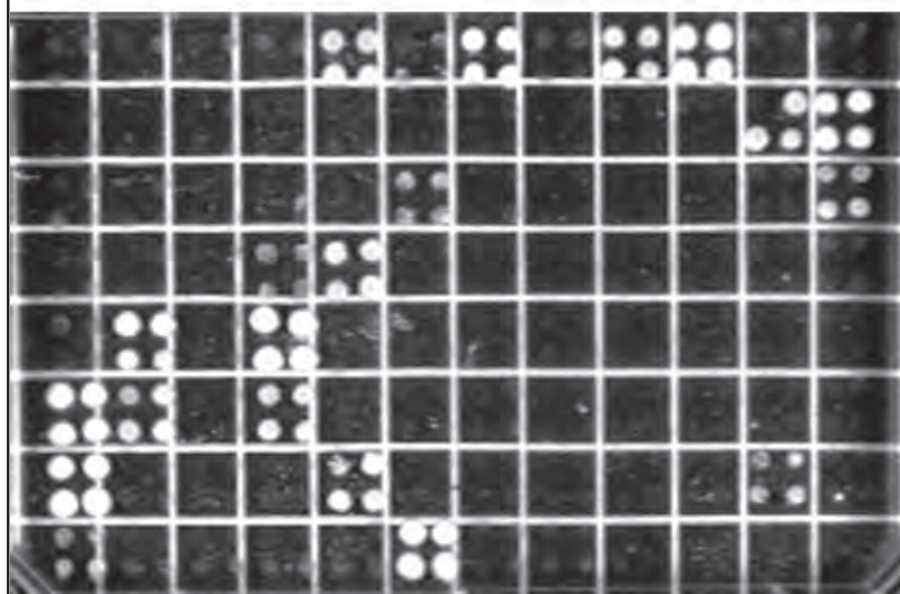

Positive reference set

Baits: pGADCg

Preys: pGBKCg

0 mM 3AT

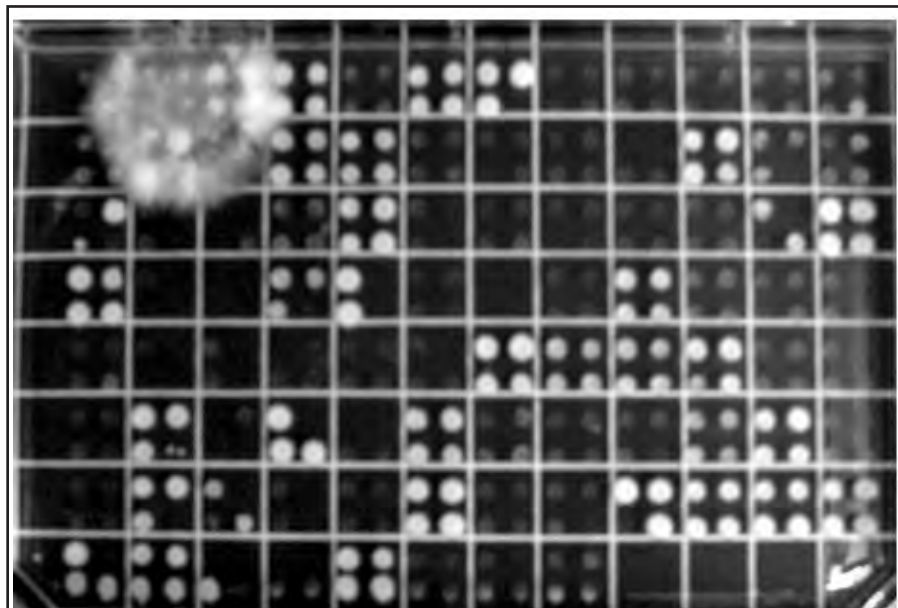

3 mM 3AT

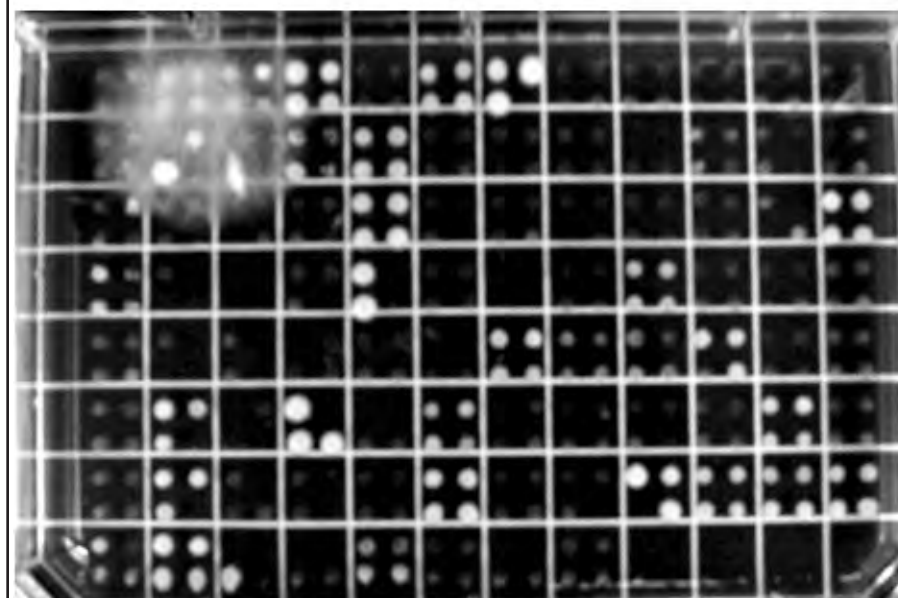

10 mM 3AT

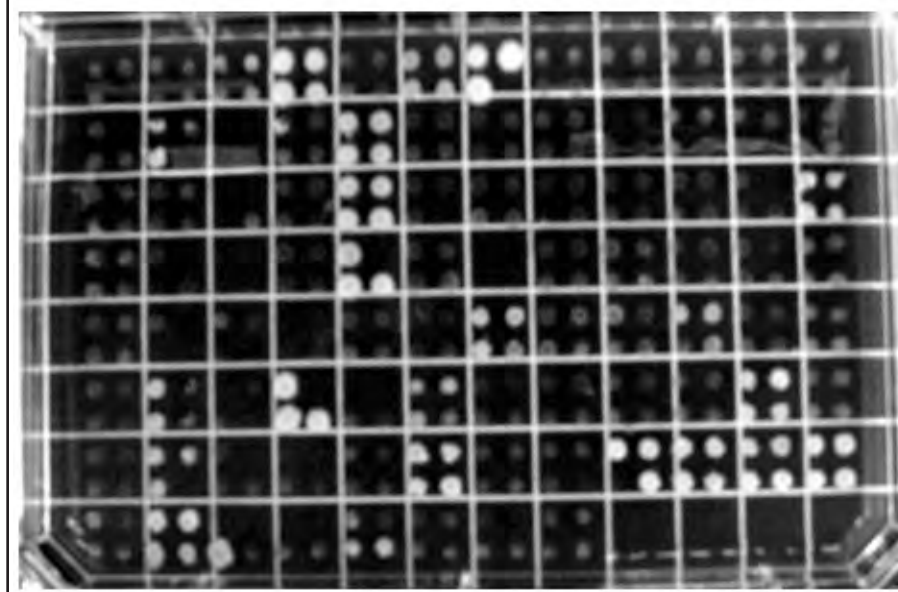

Positive reference set

Baits: pGADCg

Preys: pGBKCg

0 mM 3AT

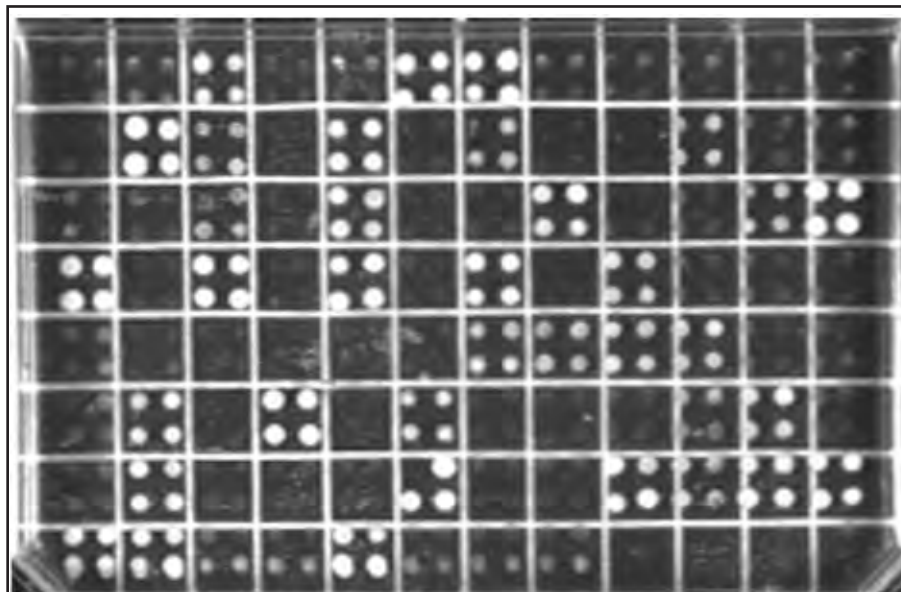

3 mM 3AT

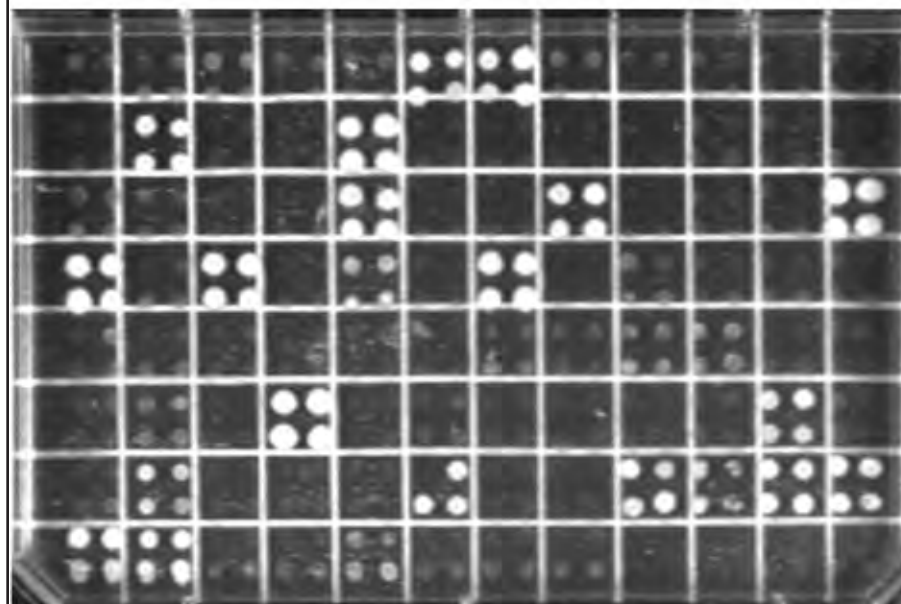

10 mM 3AT

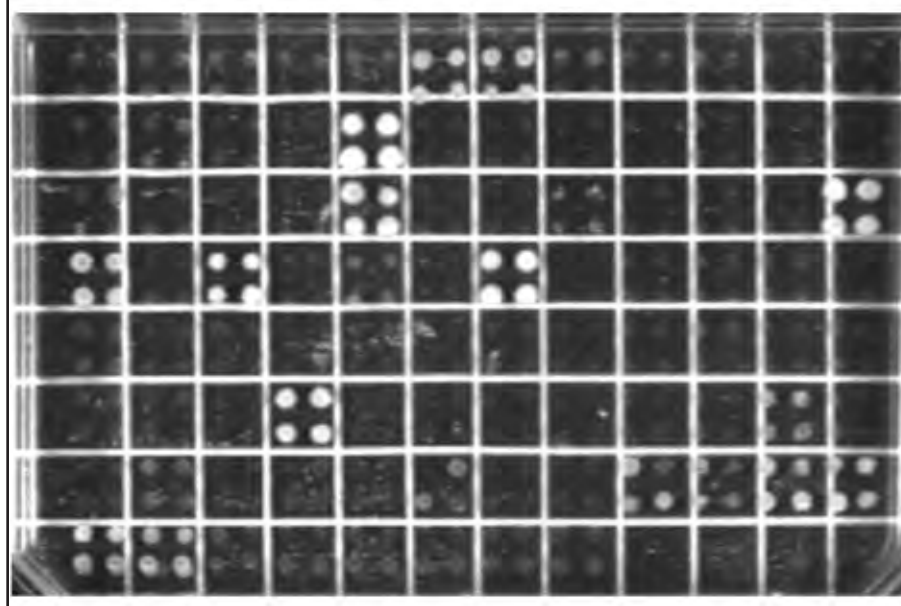



Positive reference set

Baits: pGBGT7g

Preys: pGADCg

0 mM 3AT

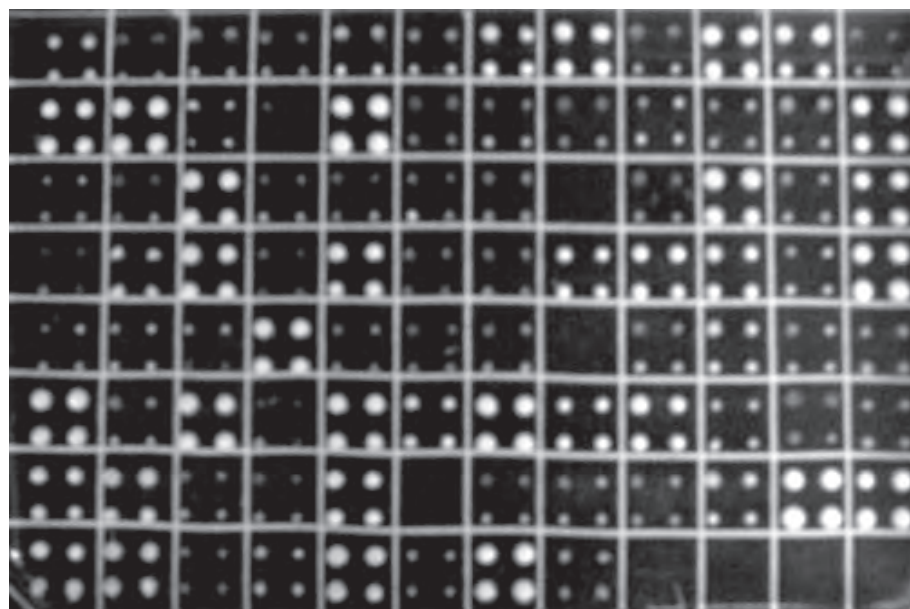

3 mM 3AT

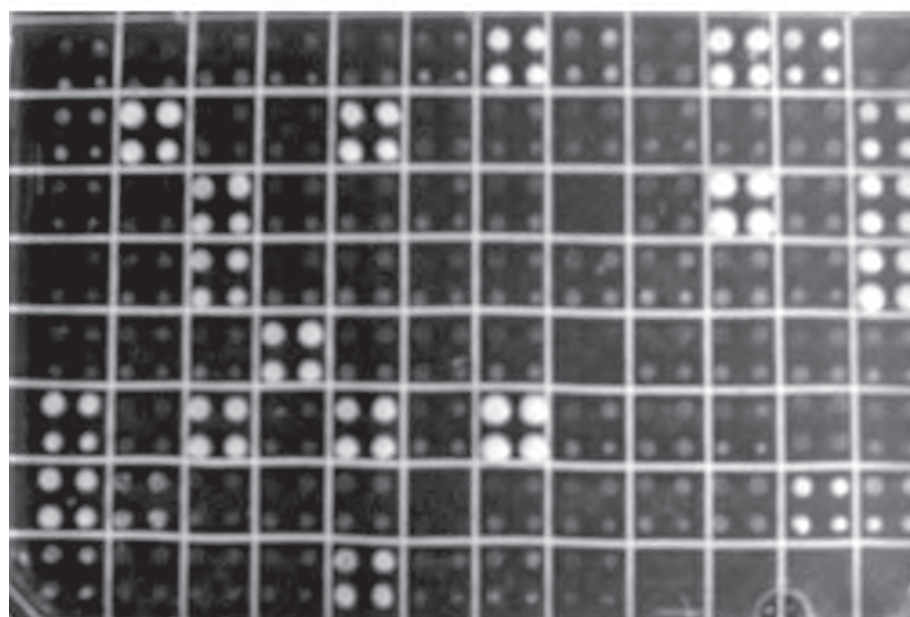

10 mM 3AT

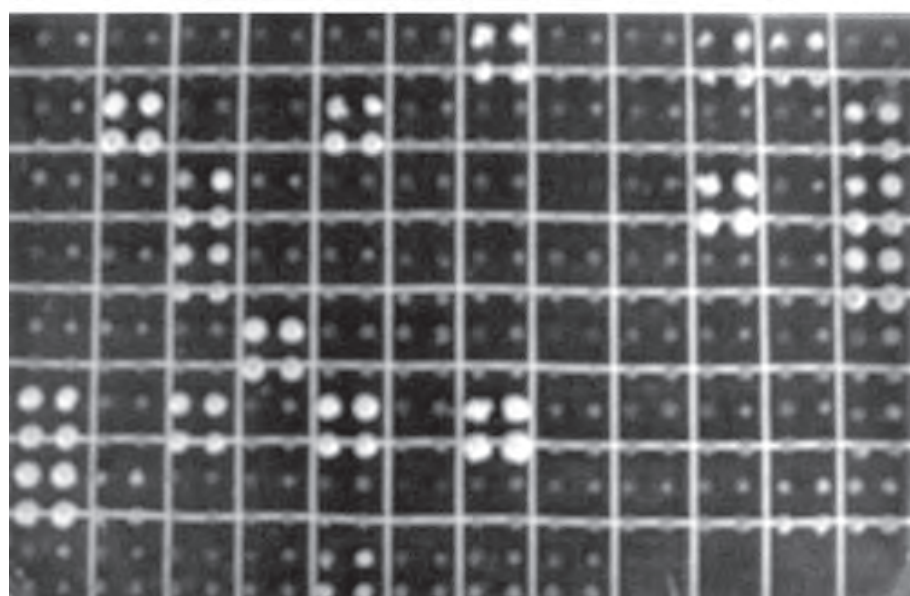

Positive reference set  
Baits: pGBGT7g  
Preys: pGADCg

0 mM 3AT

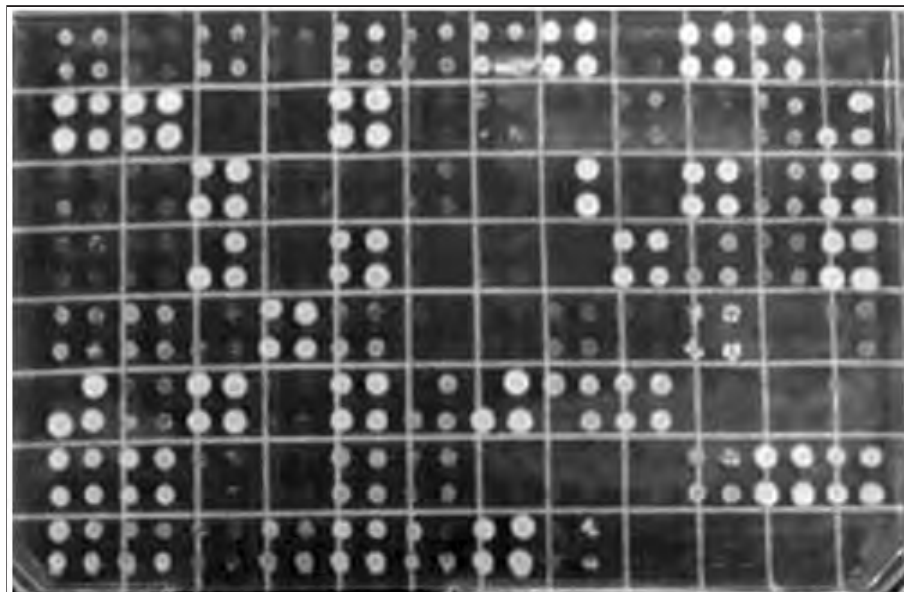

3 mM 3AT

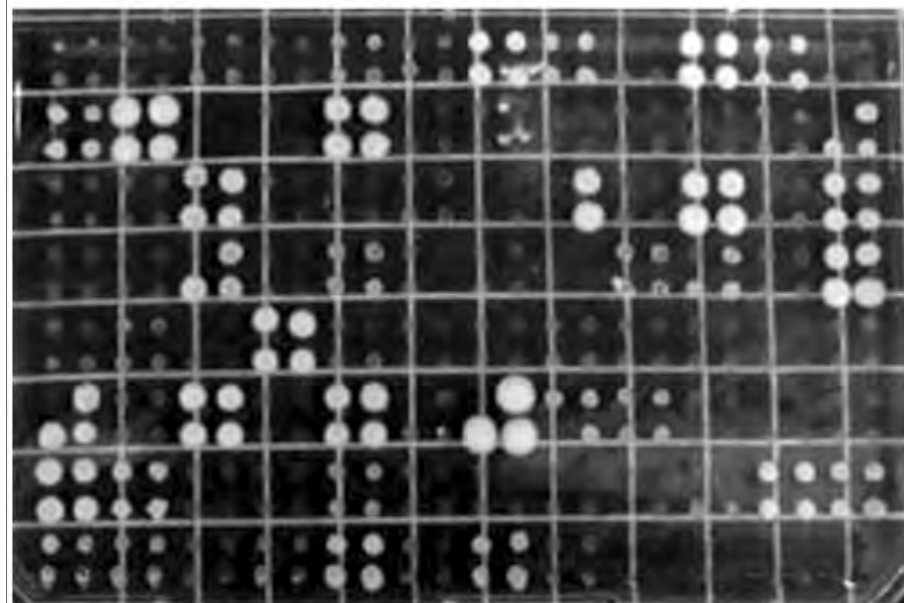

10 mM 3AT

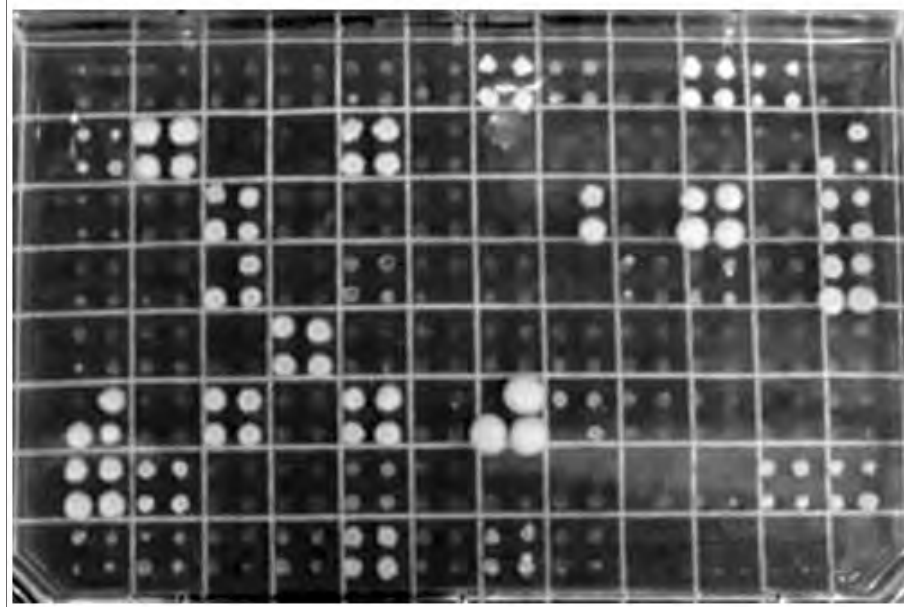

Positive reference set

Baits: pGADCg

Preys: pGBGT7g

0 mM 3AT

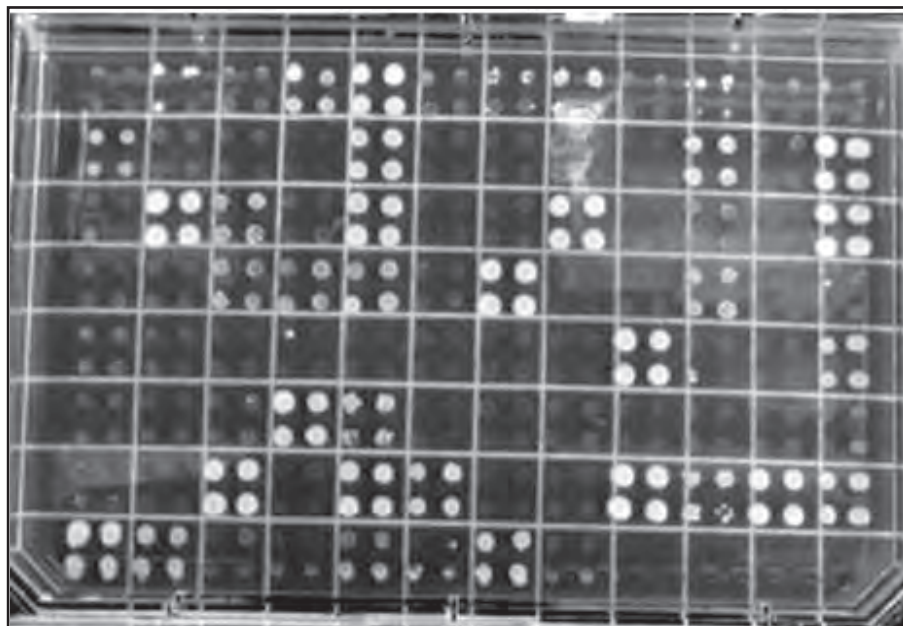

3 mM 3AT

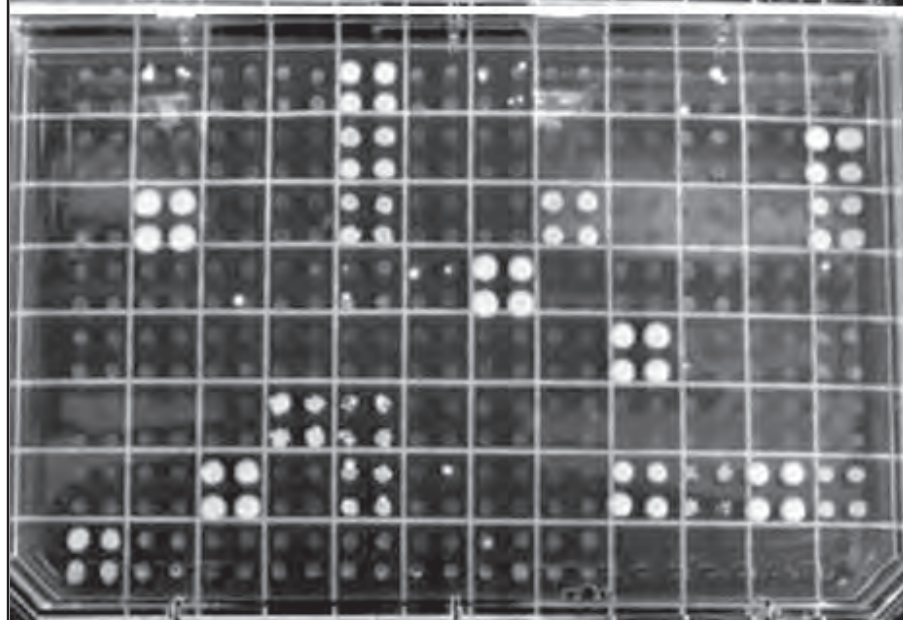

10 mM 3AT

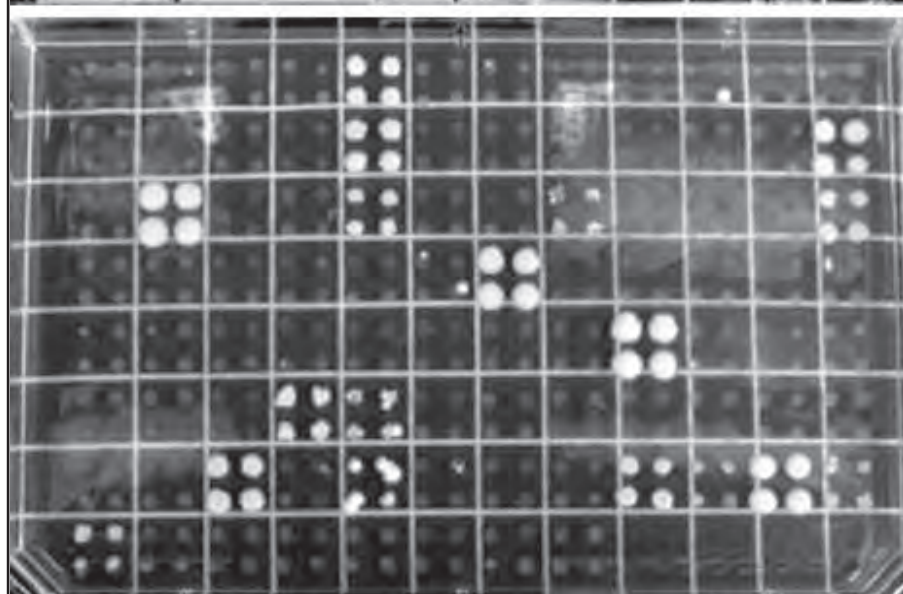

Positive reference set  
Baits: pGADCg  
Preys: pGBGT7g

0 mM 3AT

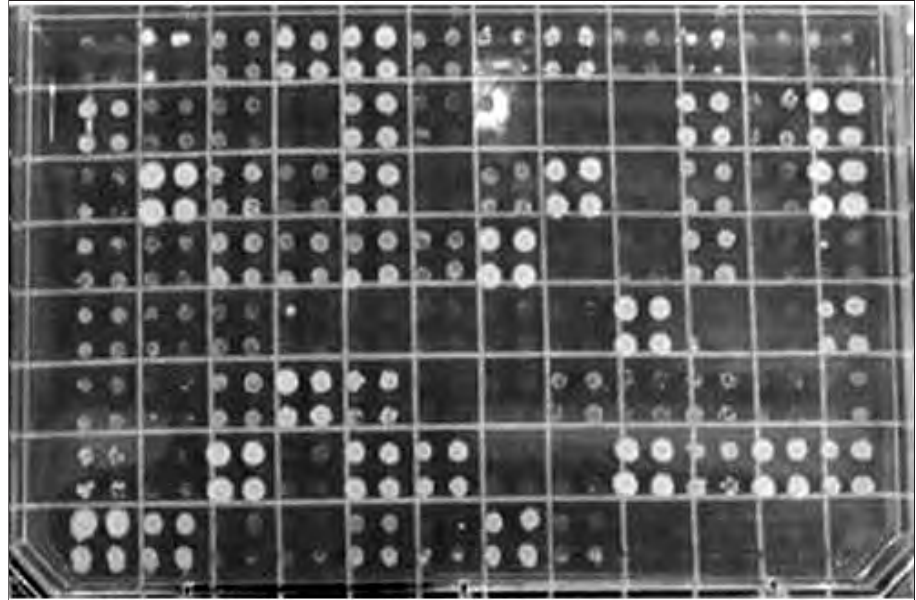

3 mM 3AT

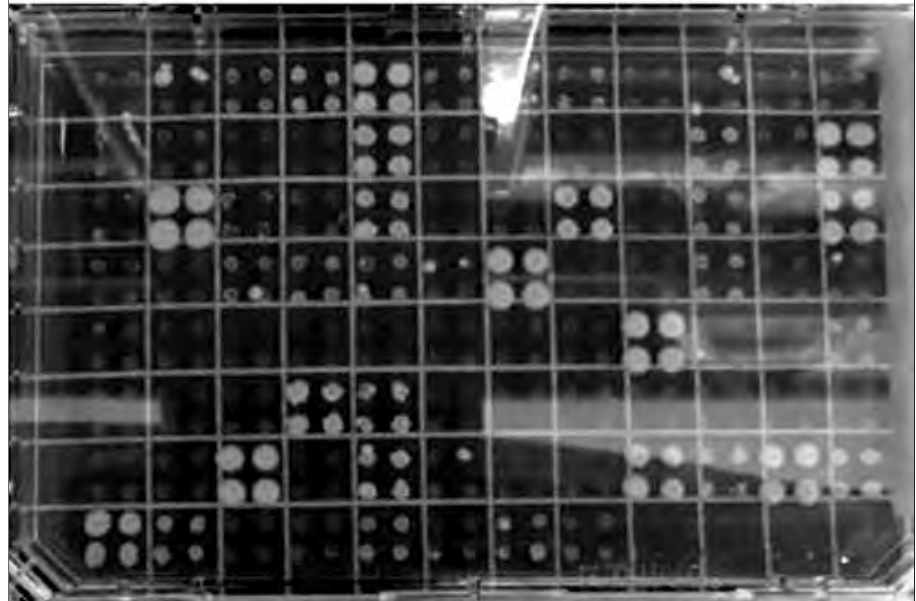

10 mM 3AT

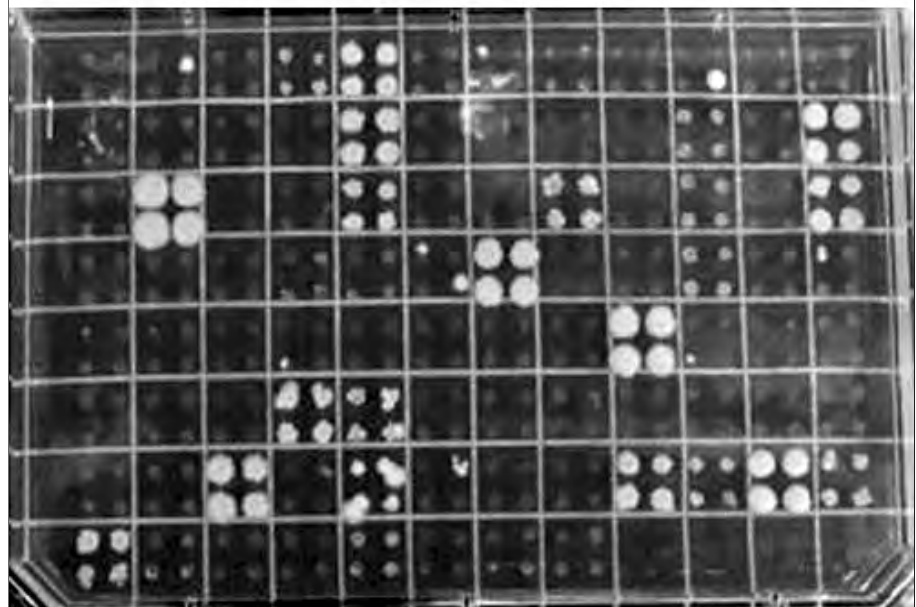

Positive reference set

Baits: pGBKCg

Preys: pGADT7g

0 mM 3AT

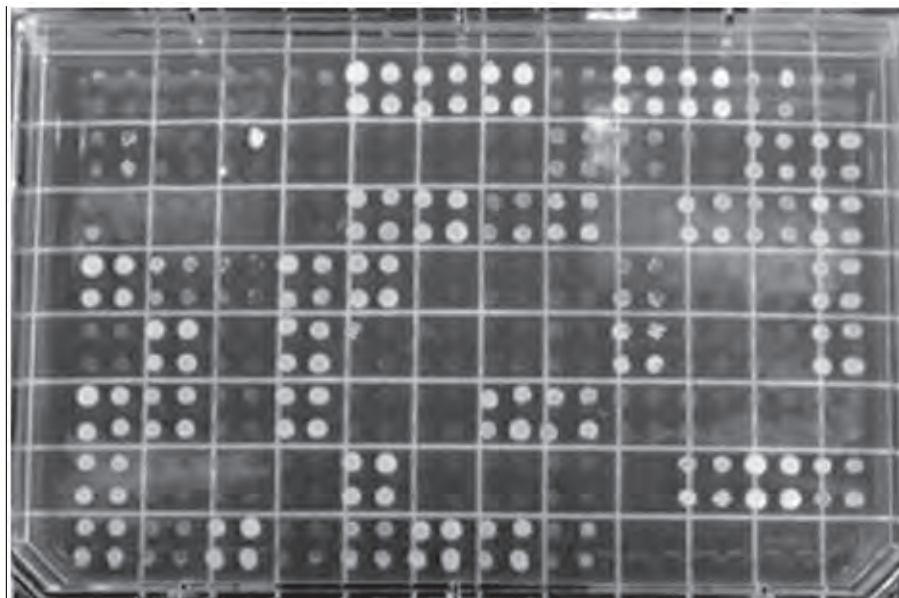

3 mM 3AT

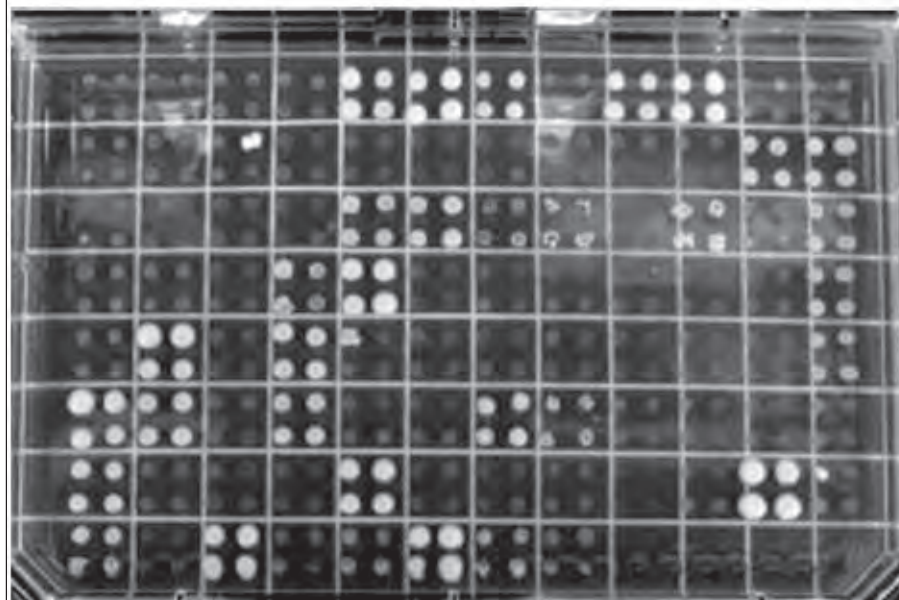

10 mM 3AT

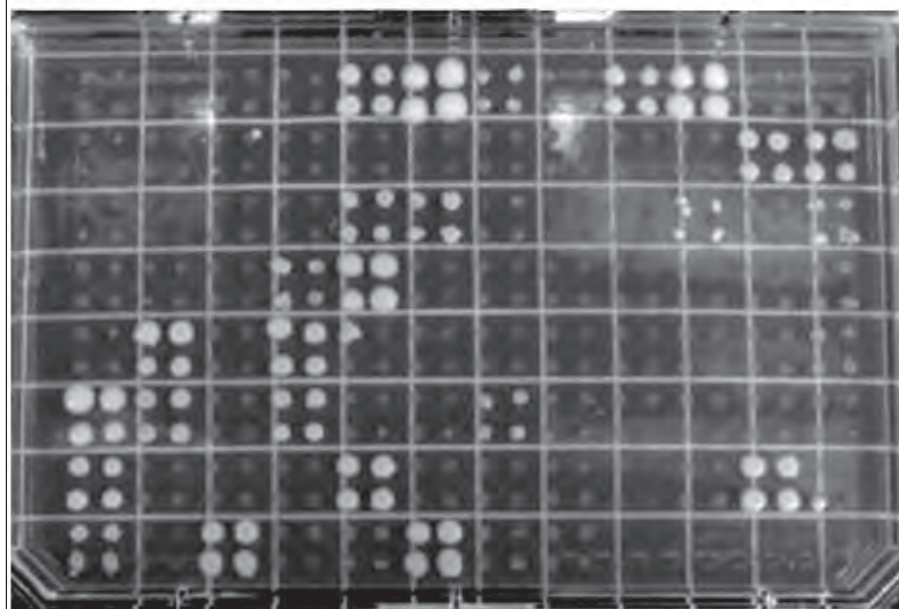

Positive reference set  
Baits: pGBKCg  
Preys: pGADT7g

0 mM 3AT

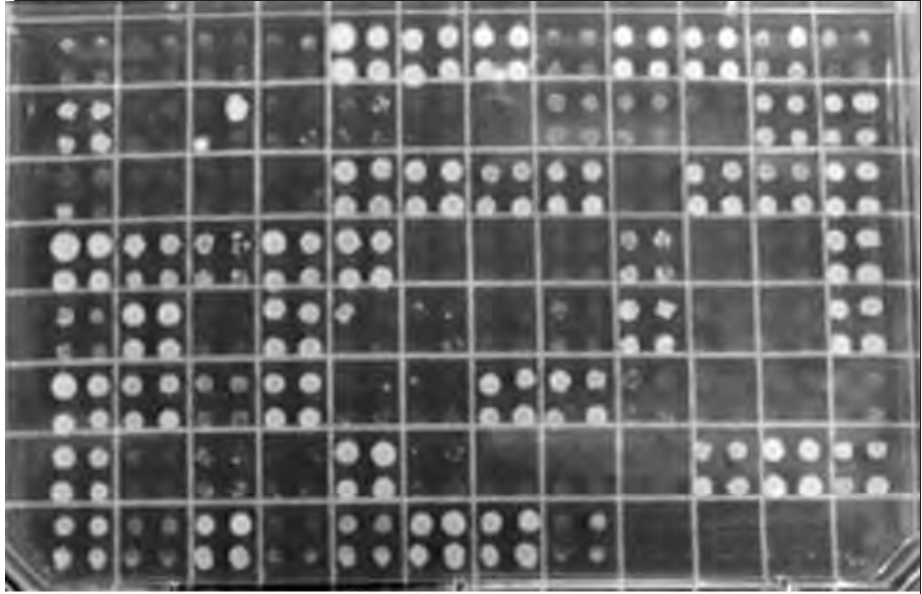

3 mM 3AT

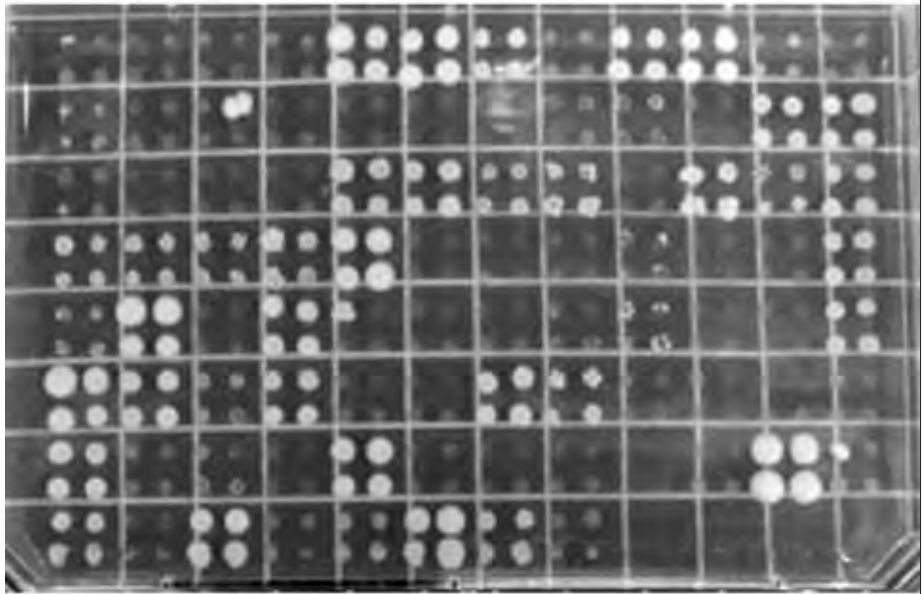

10 mM 3AT

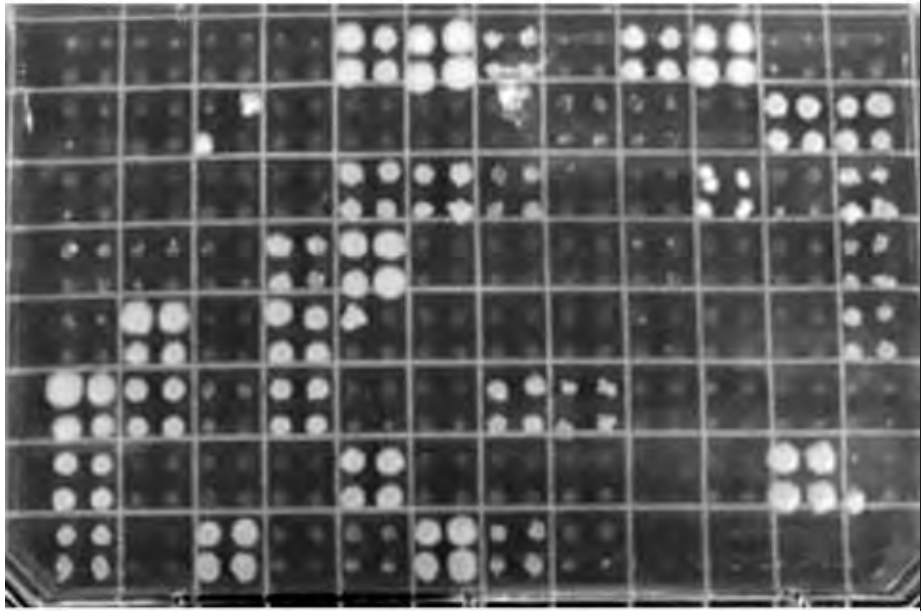

Positive reference set  
Baits: pGADT7g  
Preys: pGBKCg

0 mM 3AT

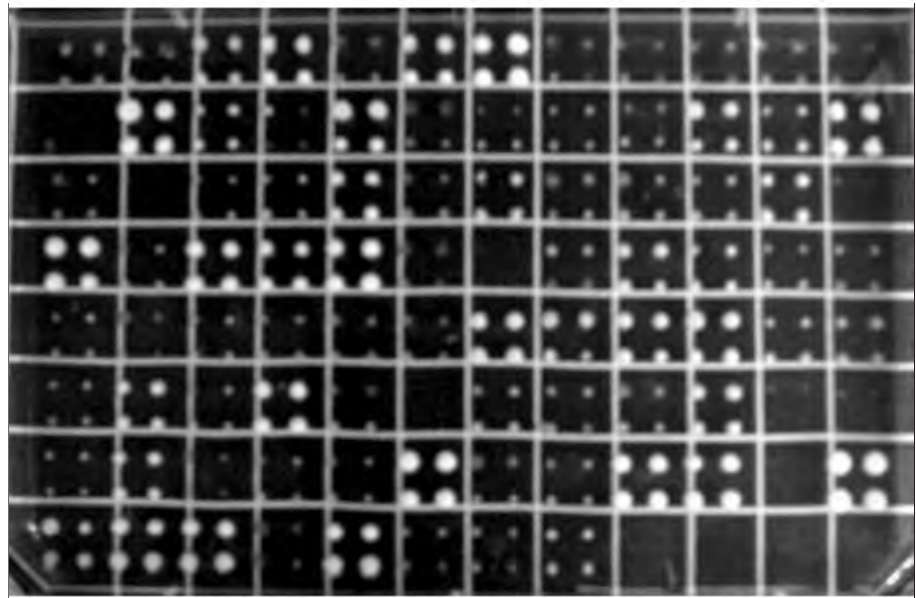

3 mM 3AT

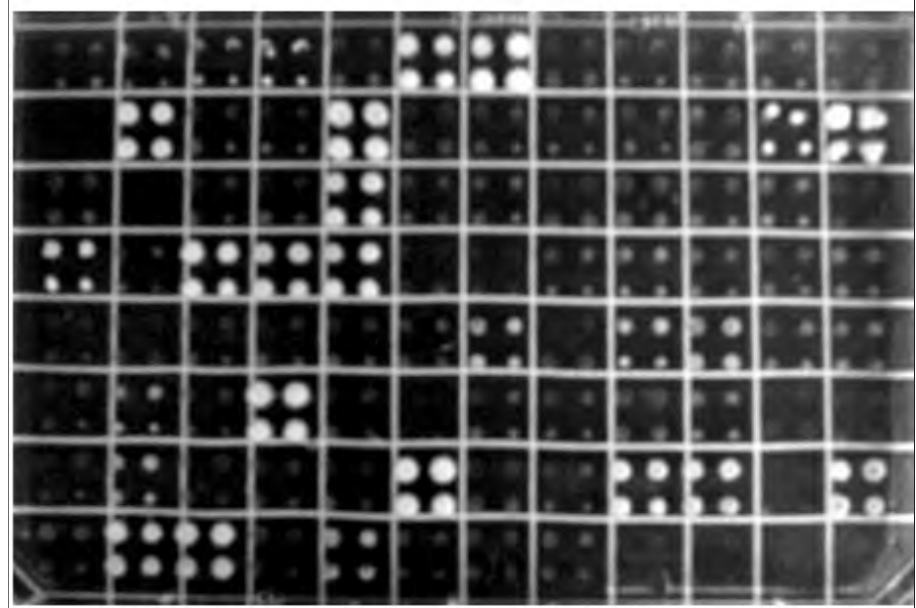

10 mM 3AT

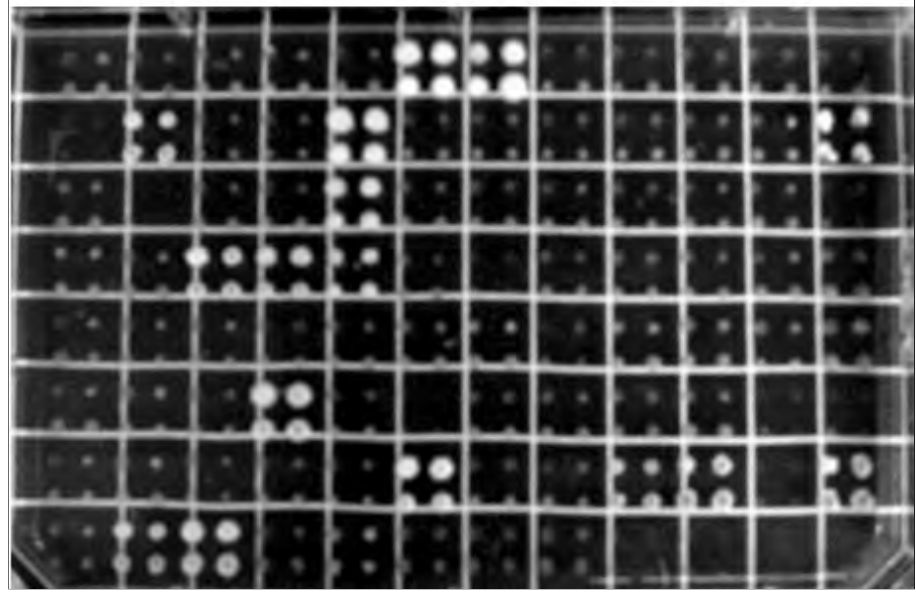

Positive reference set

Baits: pGADT7g

Preys: pGBKCg

0 mM 3AT

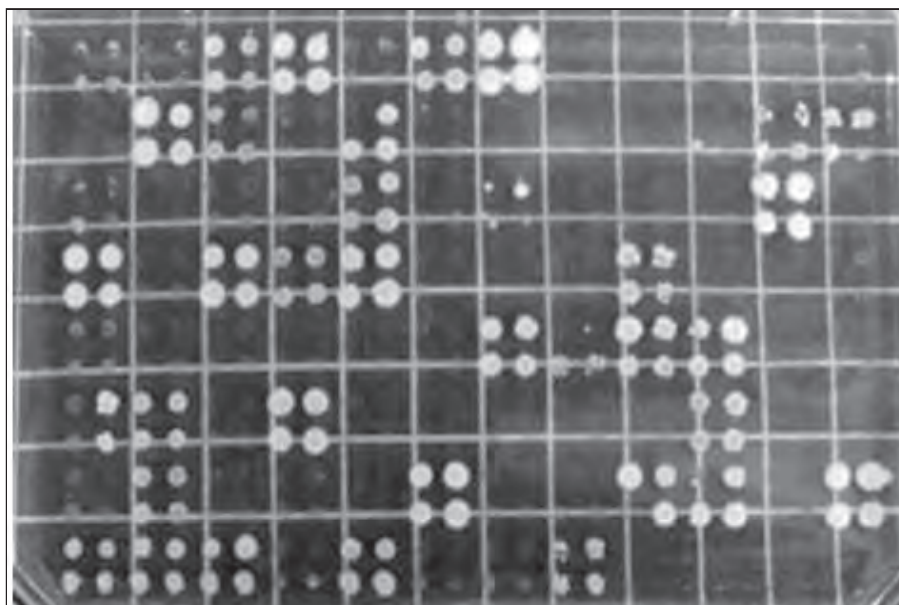

3 mM 3AT

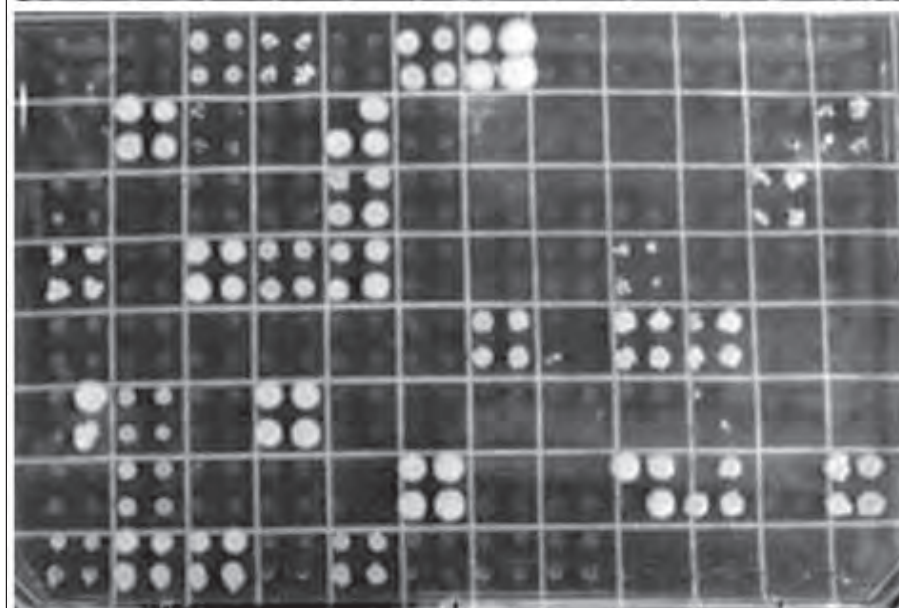

10 mM 3AT

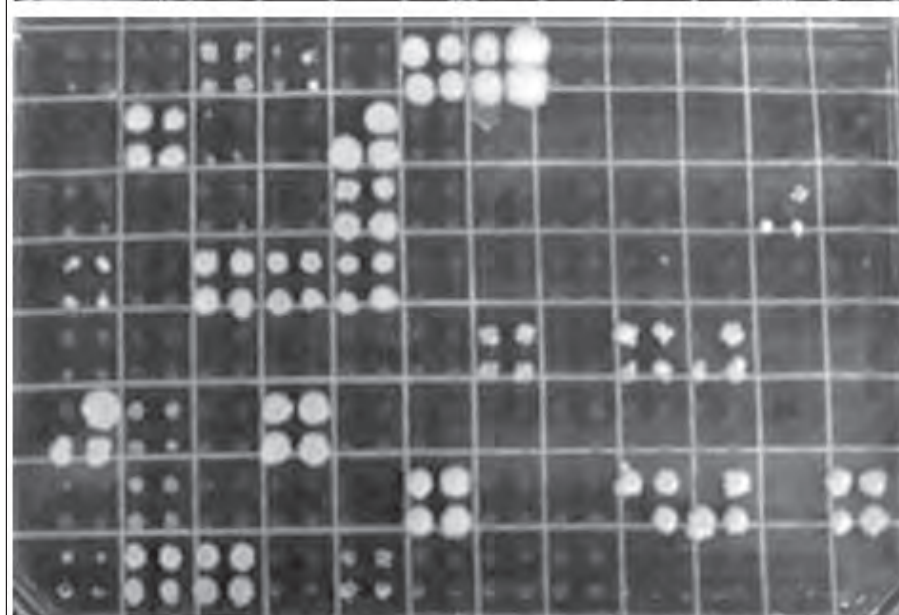



Random reference set

Baits: pDEST32

Preys: pDEST22

0 mM 3AT

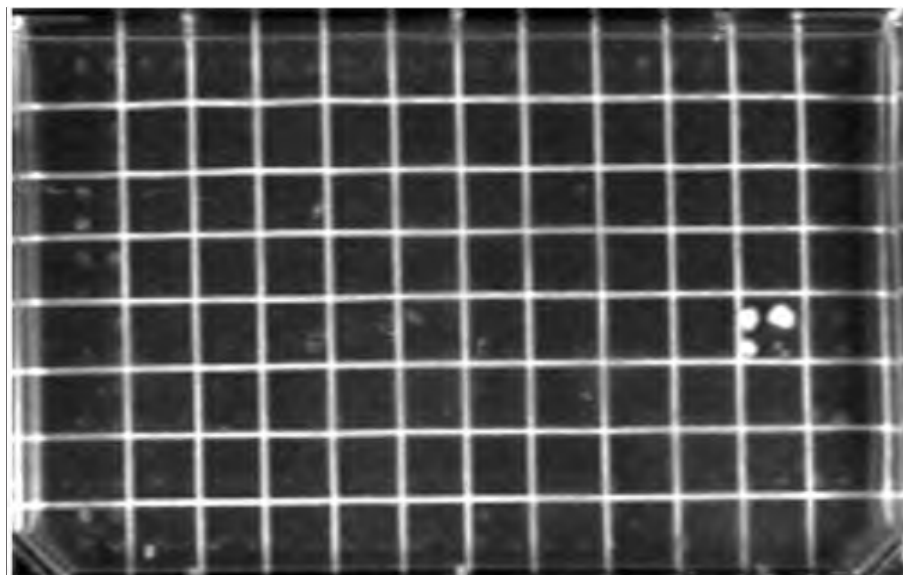

3 mM 3AT

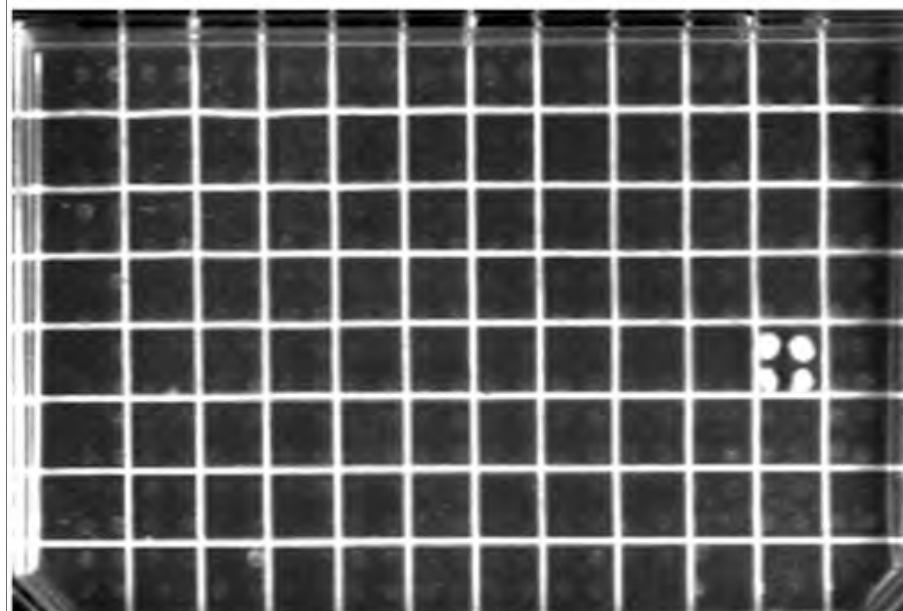

10 mM 3AT

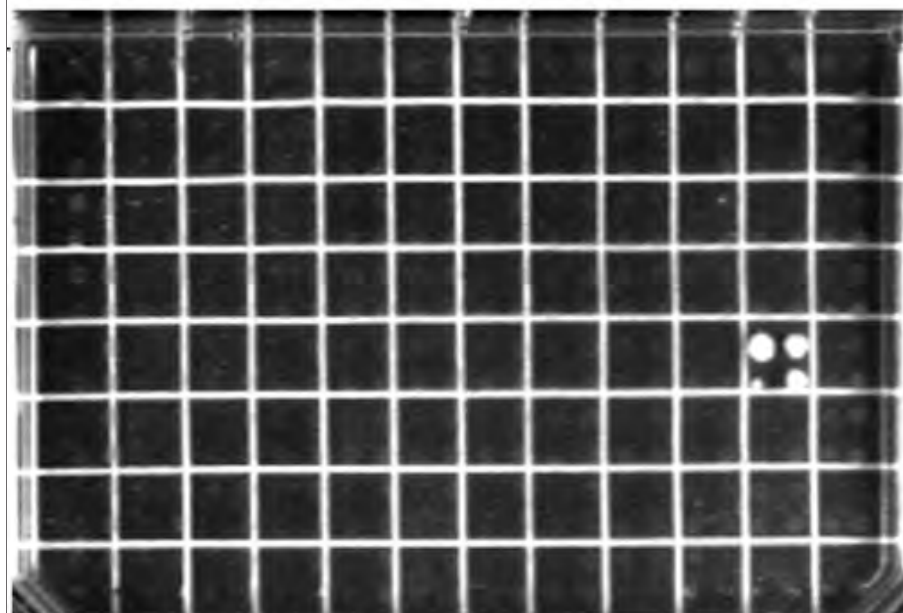

Random reference set

Baits: pDEST32

Preys: pDEST22

0 mM 3AT

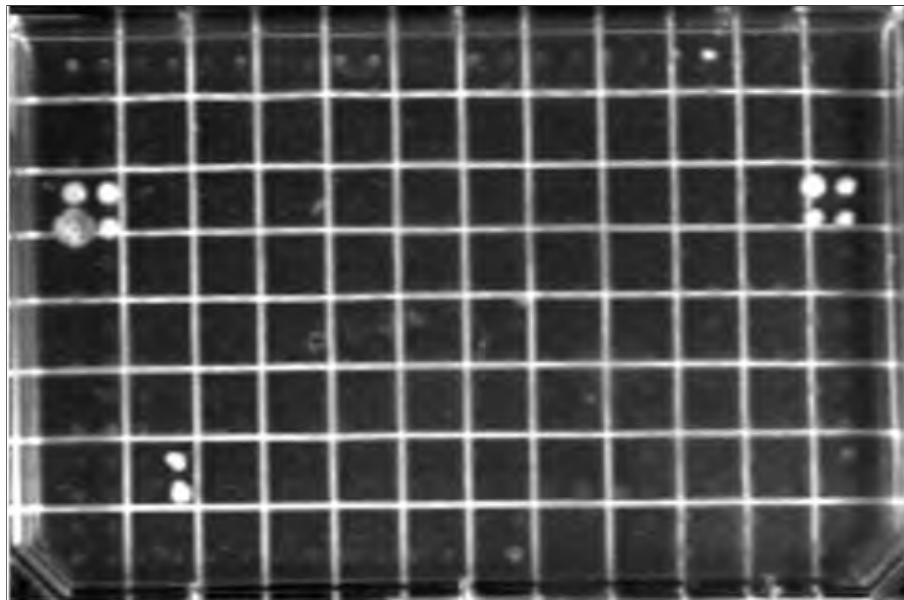

3 mM 3AT

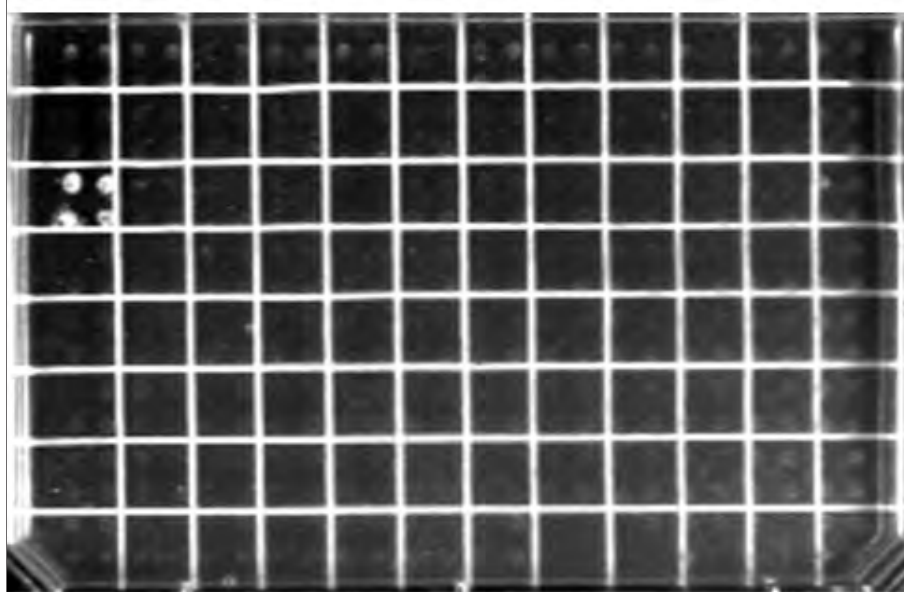

10 mM 3AT

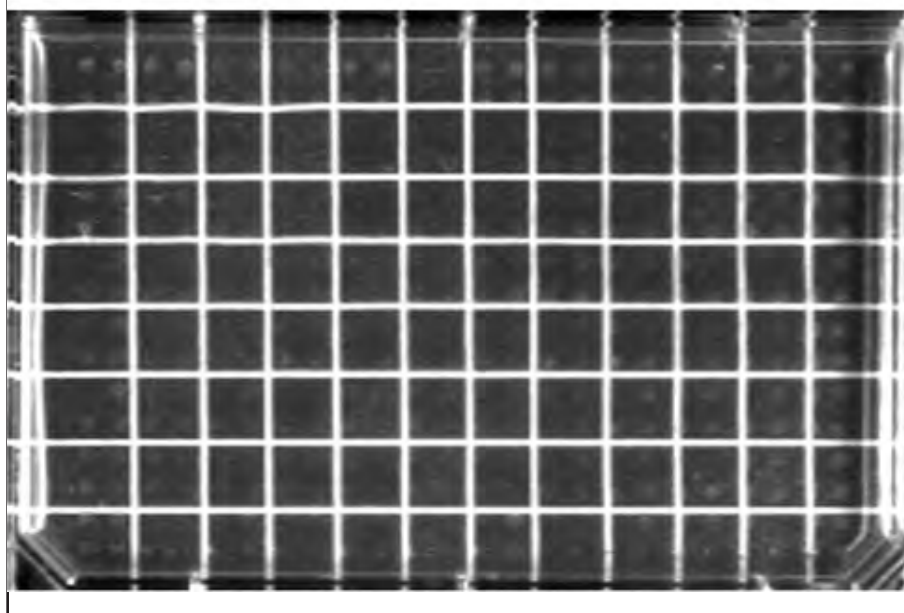

Random reference set  
Baits: pDEST22  
Preys: pDEST32

0 mM 3AT

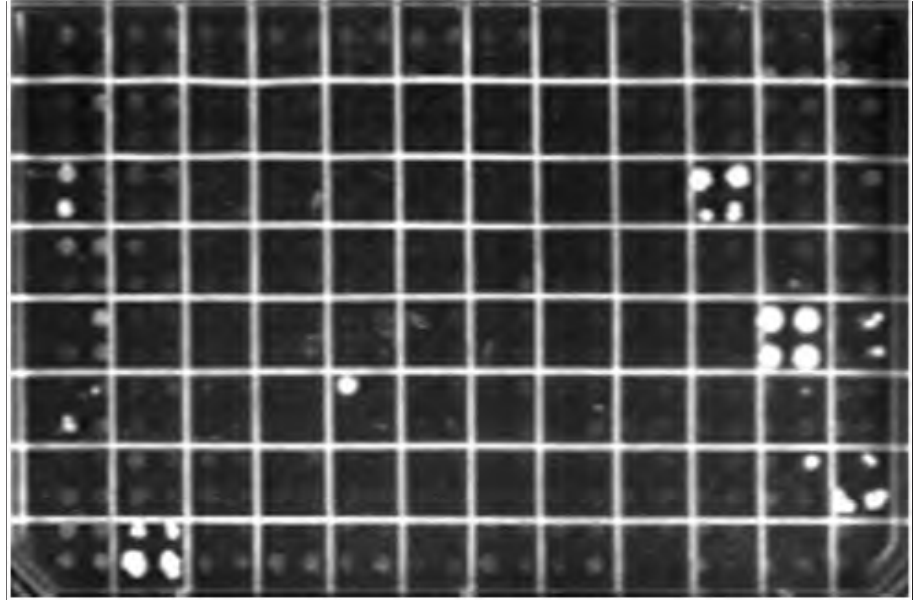

3 mM 3AT

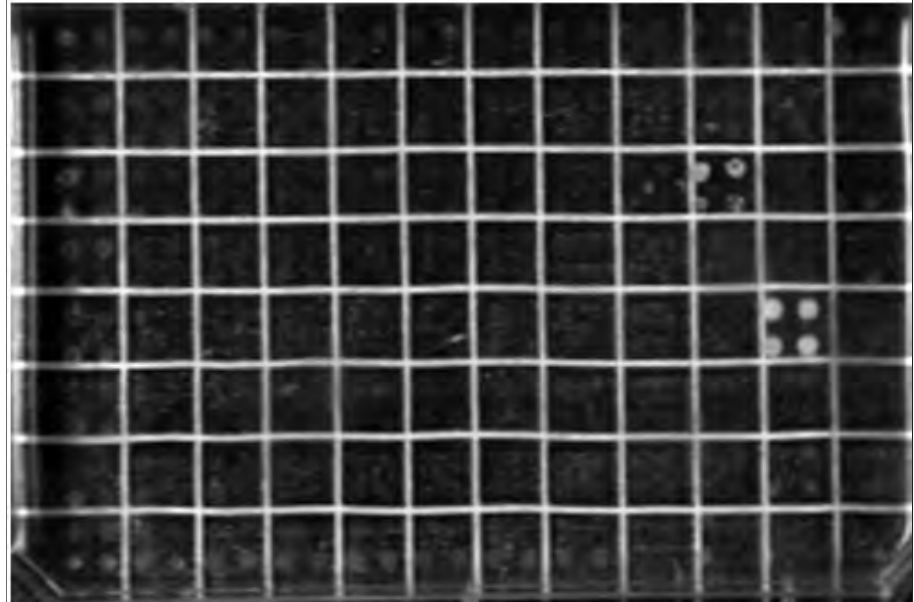

10 mM 3AT

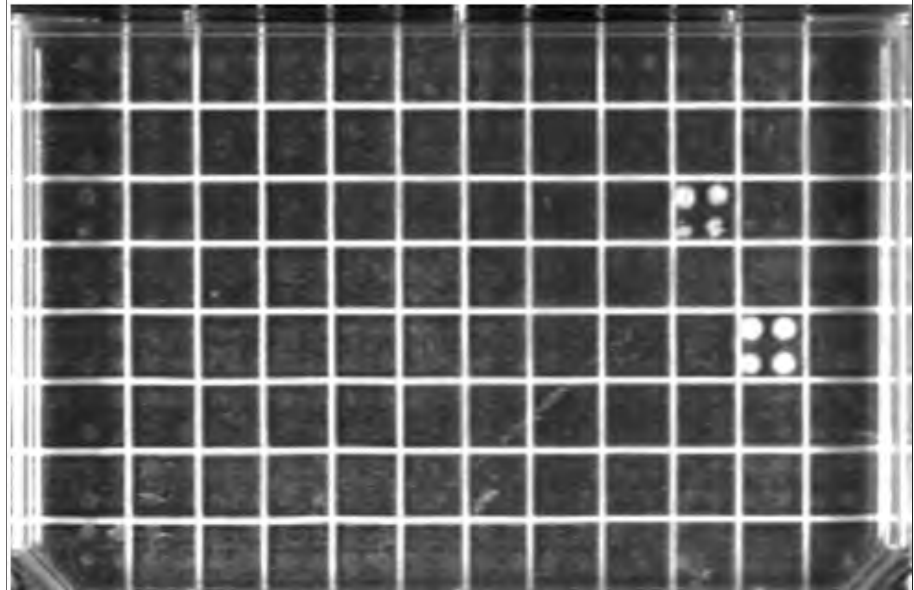

Random reference set  
Baits: pDEST22  
Preys: pDEST32

0 mM 3AT

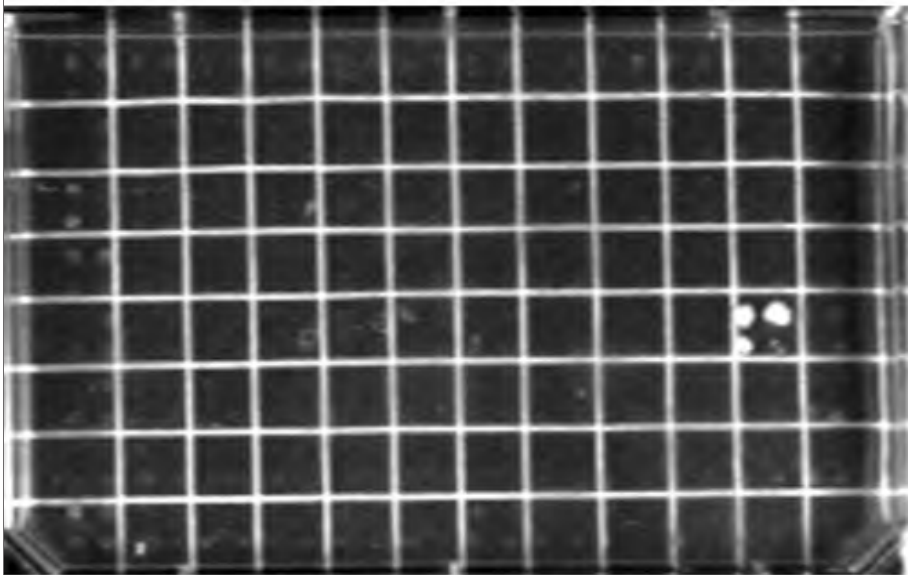

3 mM 3AT

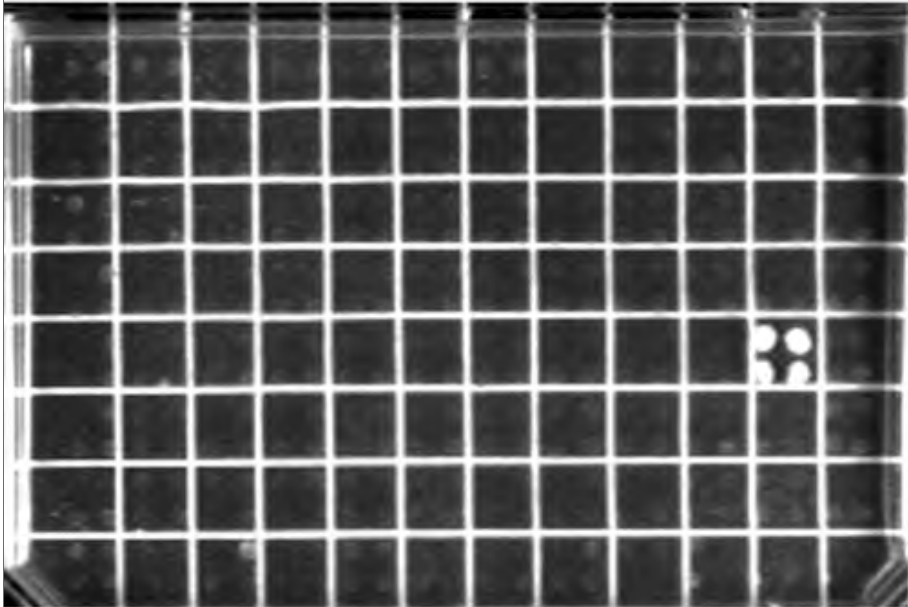

10 mM 3AT

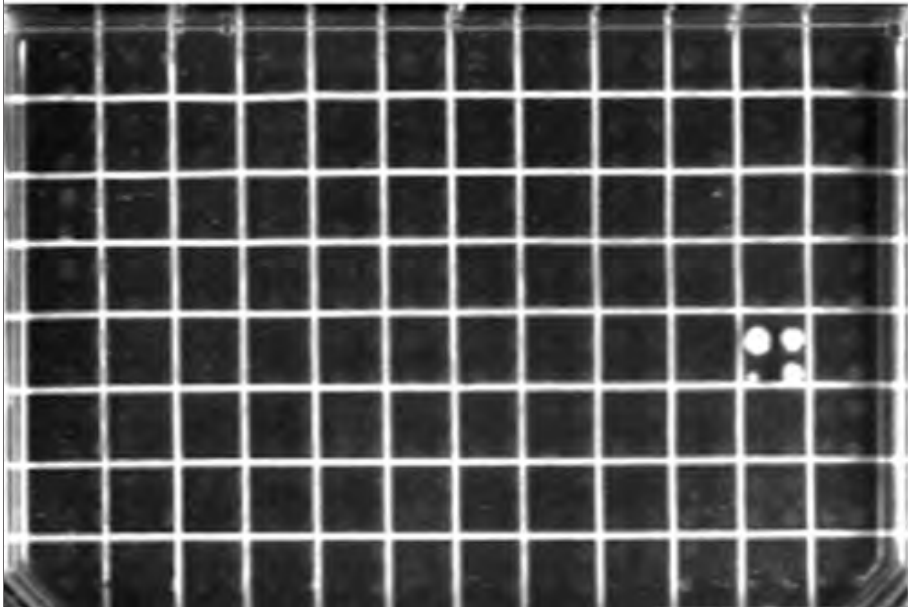

Random reference set

Baits: pGBGT7g

Preys: pGADT7g

0 mM 3AT

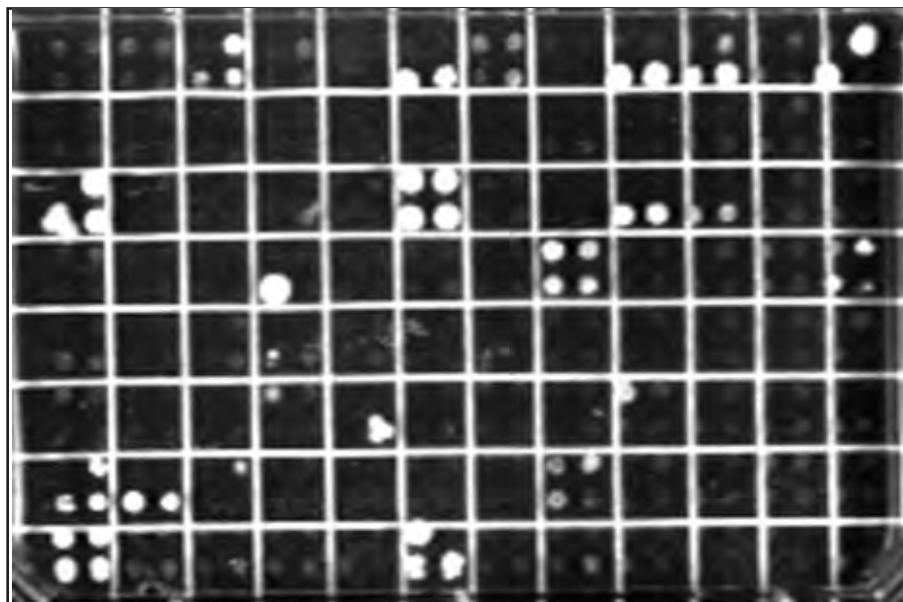

3 mM 3AT

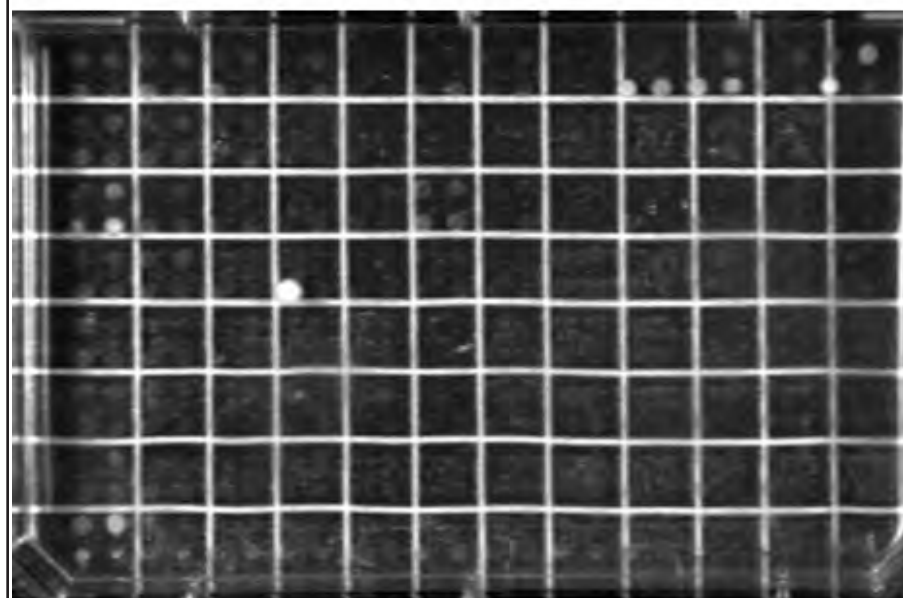

10 mM 3AT

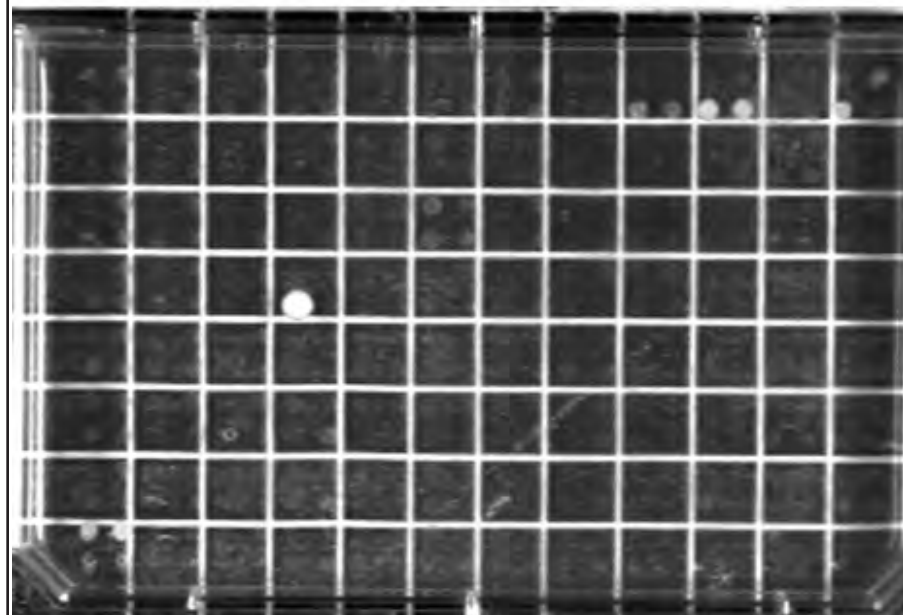

Random reference set

Baits: pGBT7g

Preys: pGADT7g

0 mM 3AT

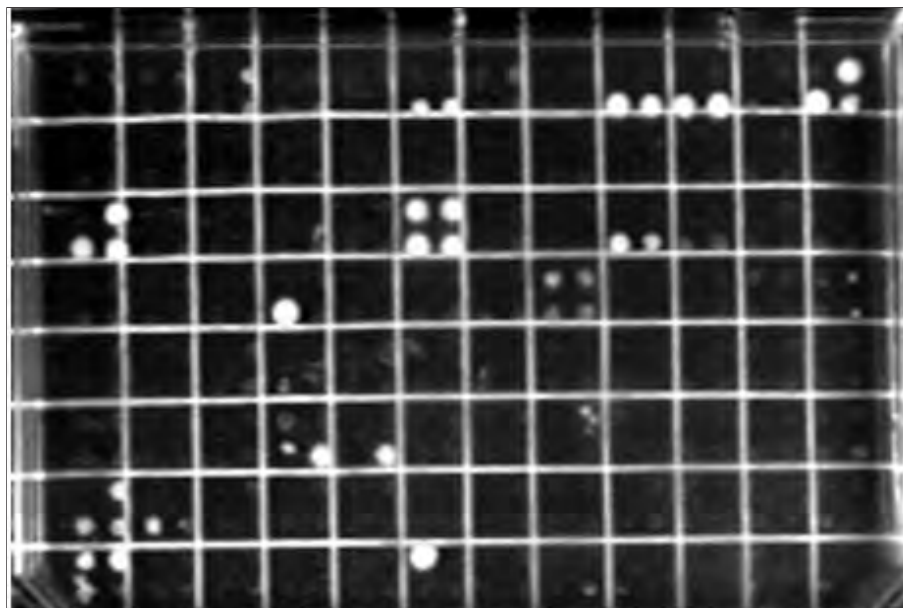

3 mM 3AT

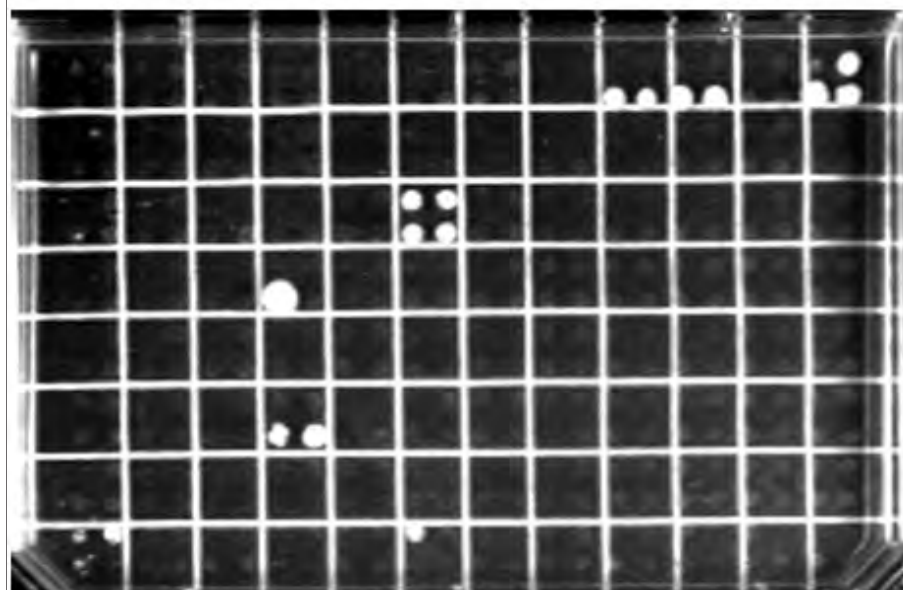

10 mM 3AT

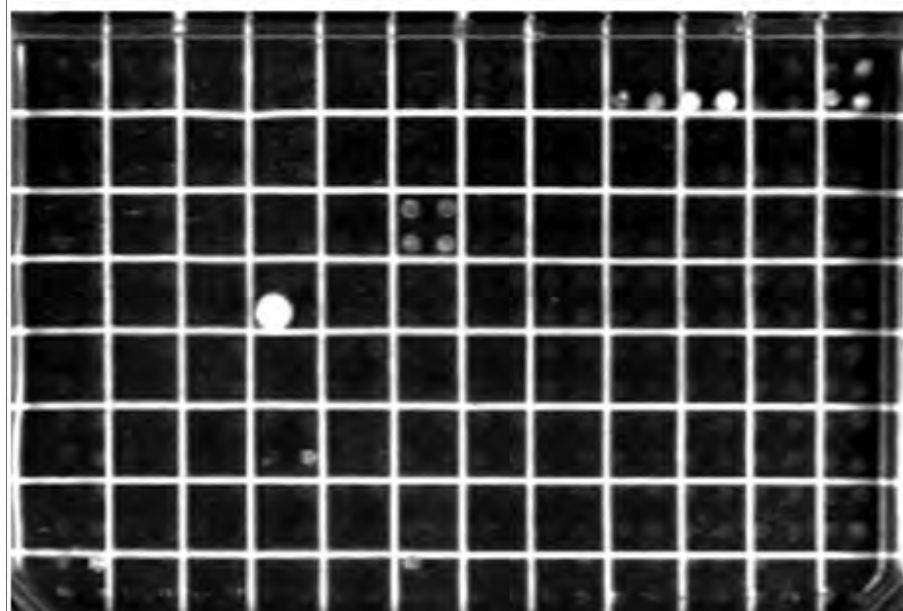

Random reference set

Baits: pGADT7g

Preys: pGBGT7g

0 mM 3AT

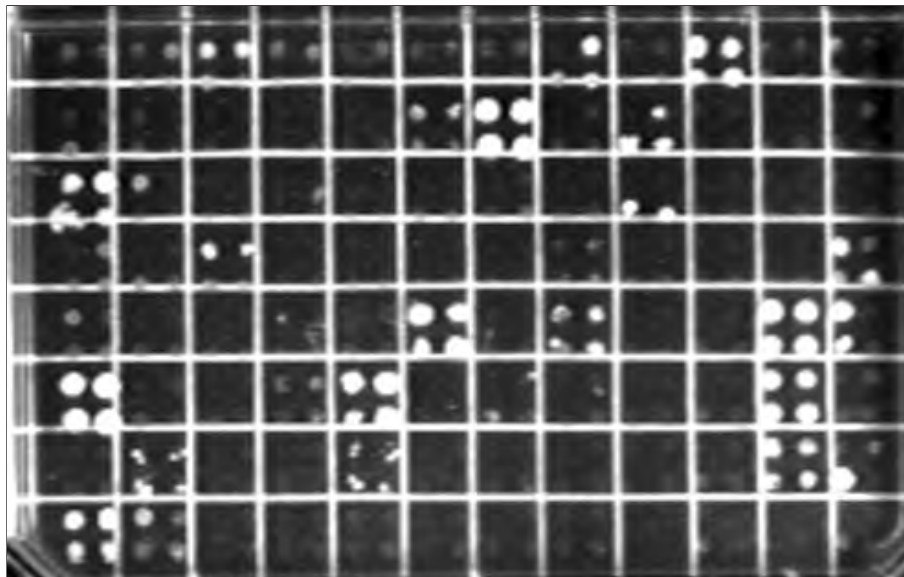

3 mM 3AT

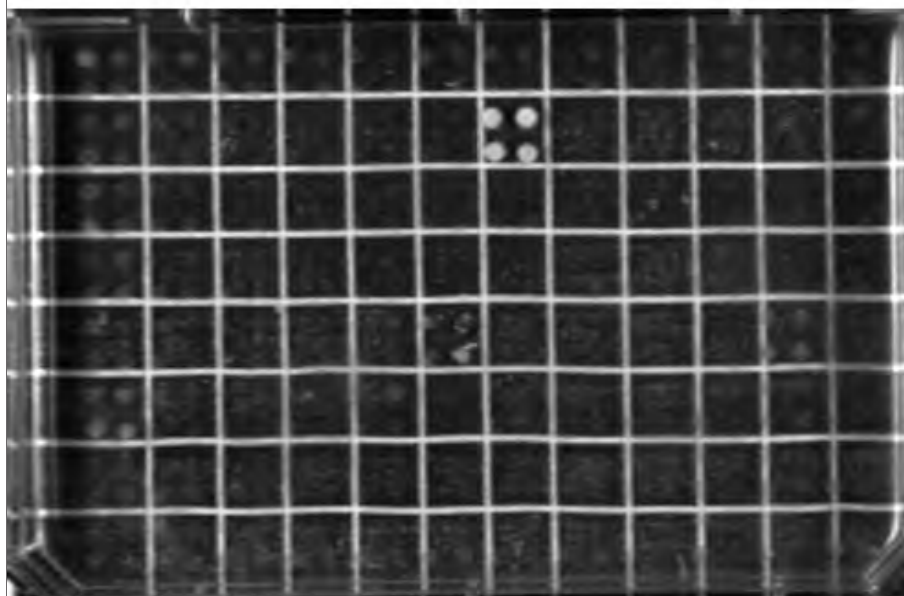

10 mM 3AT

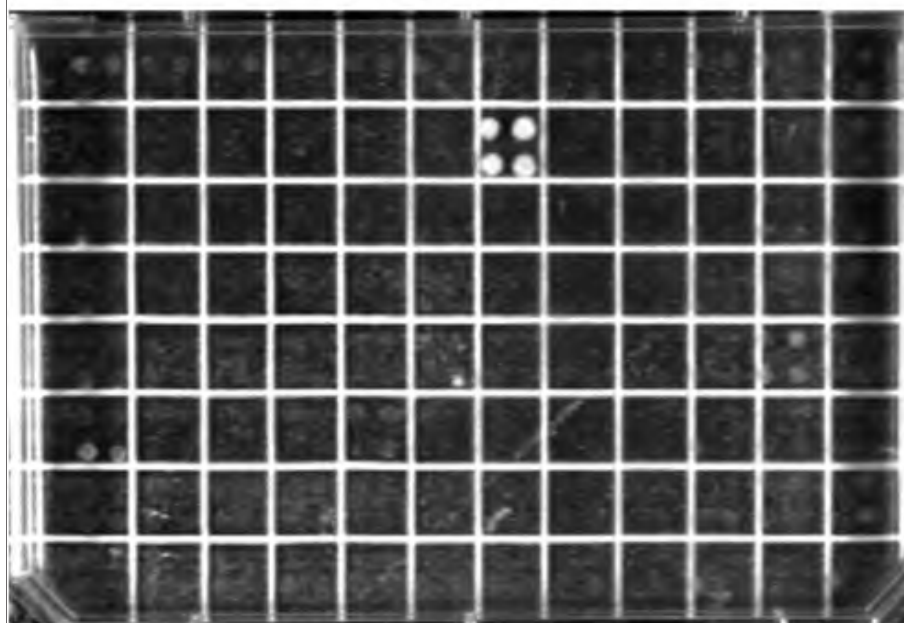

Random reference set

Baits: pGADT7g

Preys: pGBGT7g

0 mM 3AT

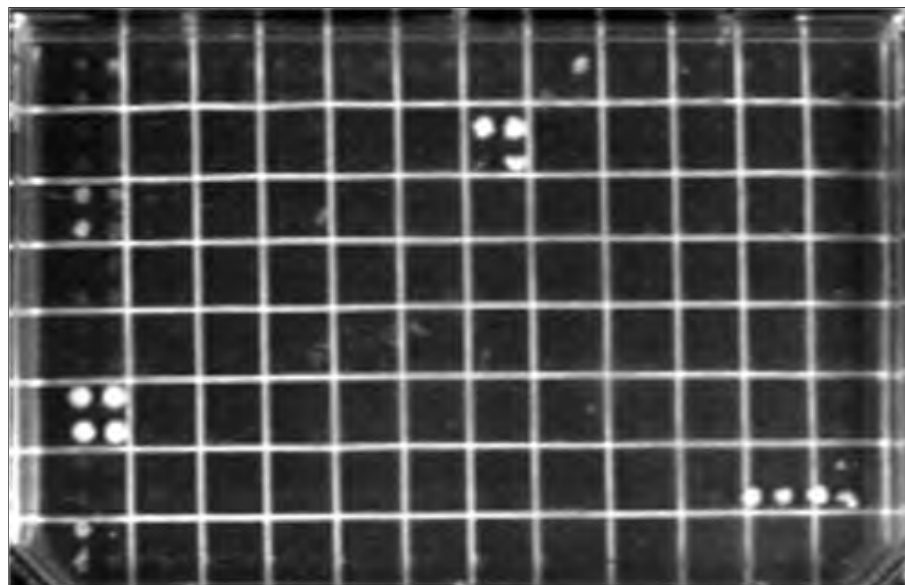

3 mM 3AT

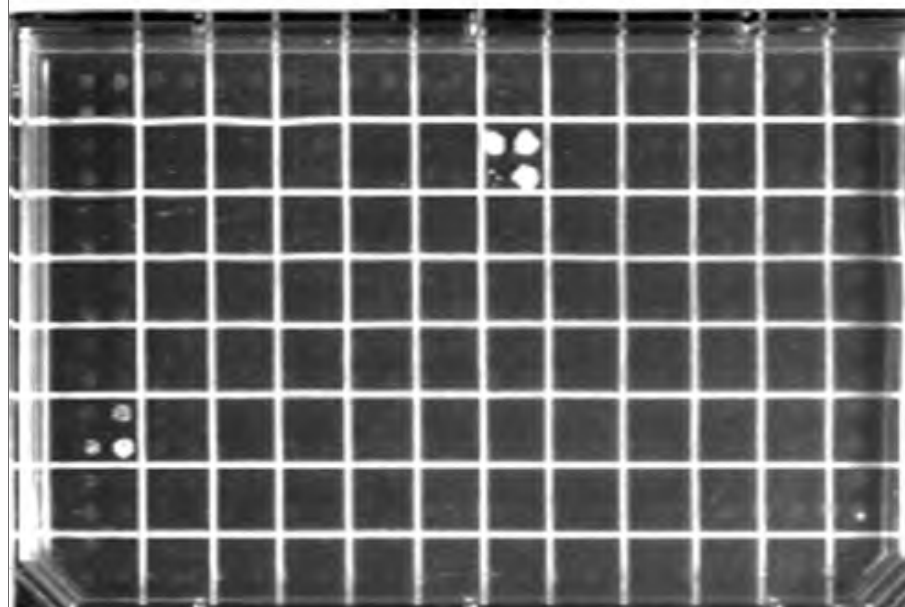

10 mM 3AT

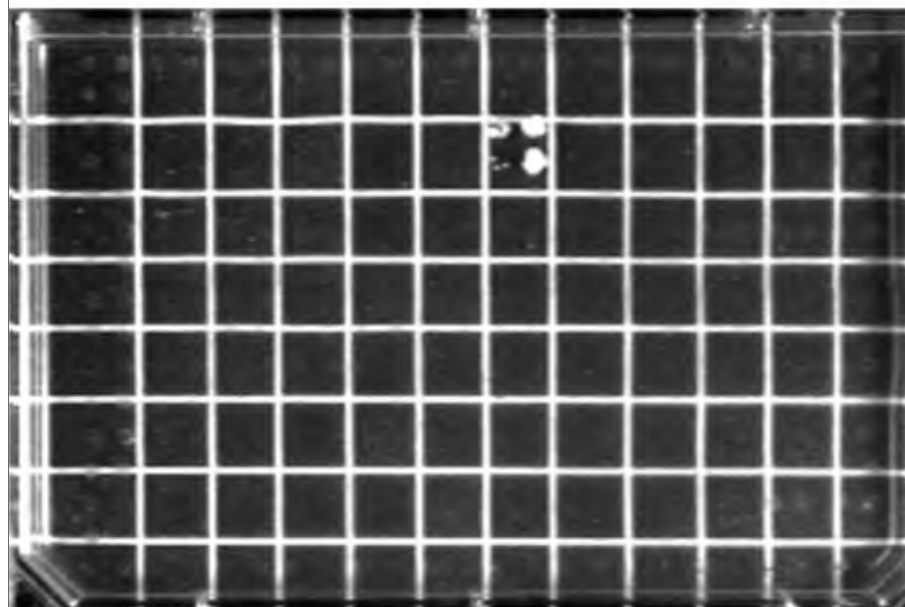



Random reference set  
Baits: pGBKCg  
Preys: pGADCg

0 mM 3AT

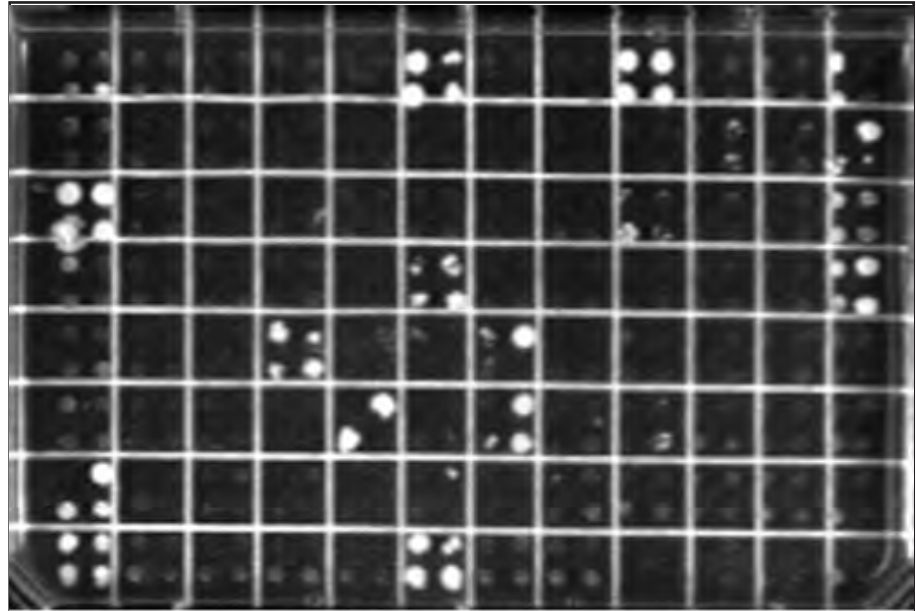

3 mM 3AT

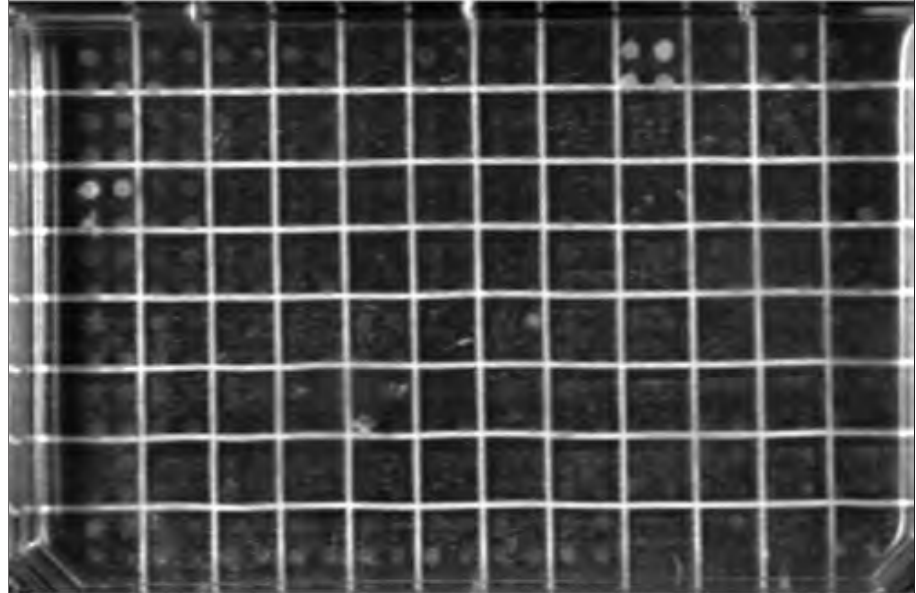

10 mM 3AT

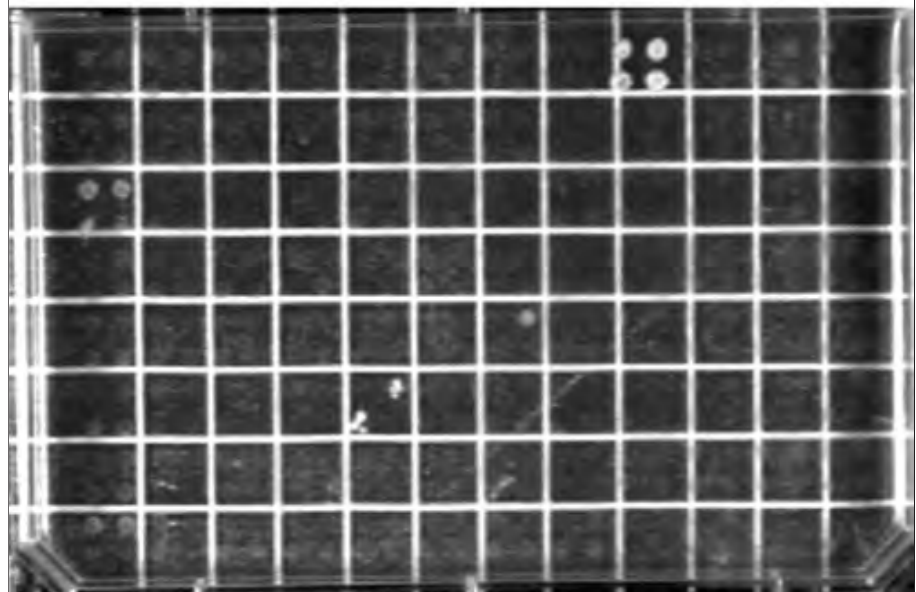

Random reference set  
Baits: pGBKCg  
Preys: pGADCg

0 mM 3AT

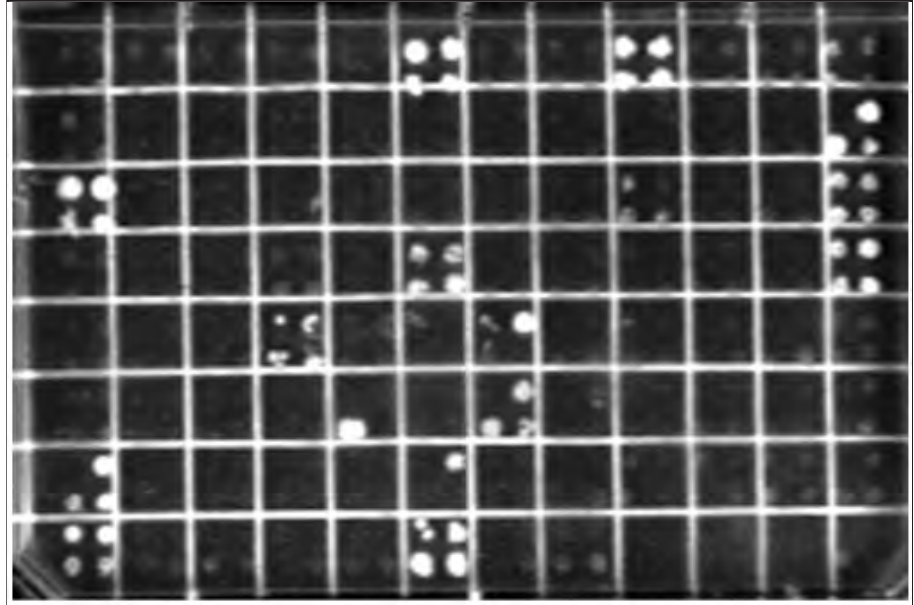

3 mM 3AT

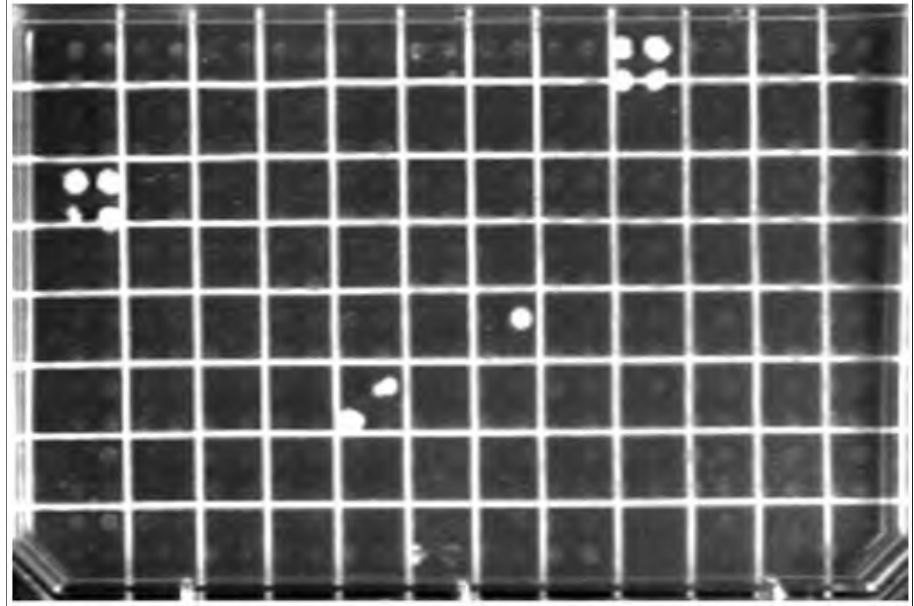

10 mM 3AT

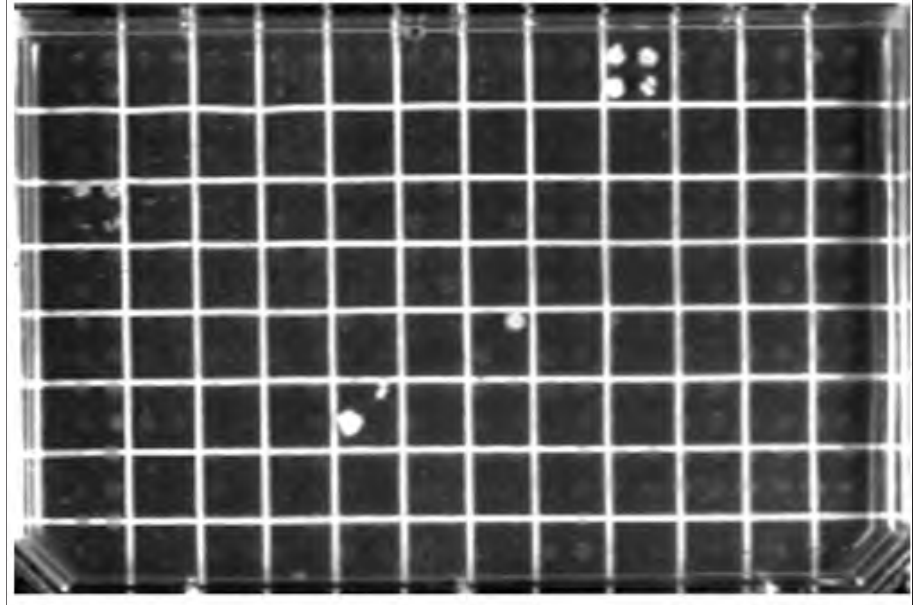

Random reference set

Baits: pGADCg

Preys: pGBKCg

0 mM 3AT

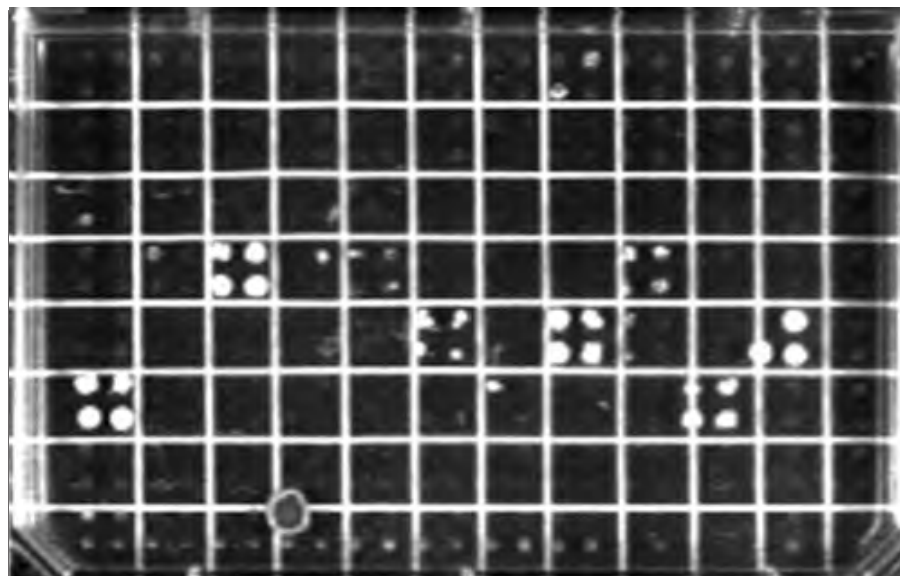

3 mM 3AT

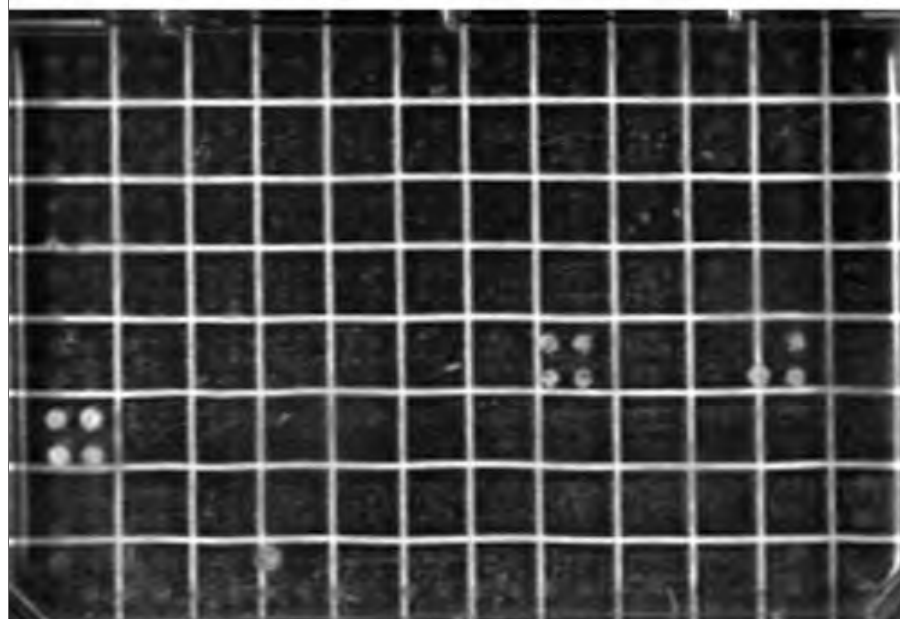

10 mM 3AT

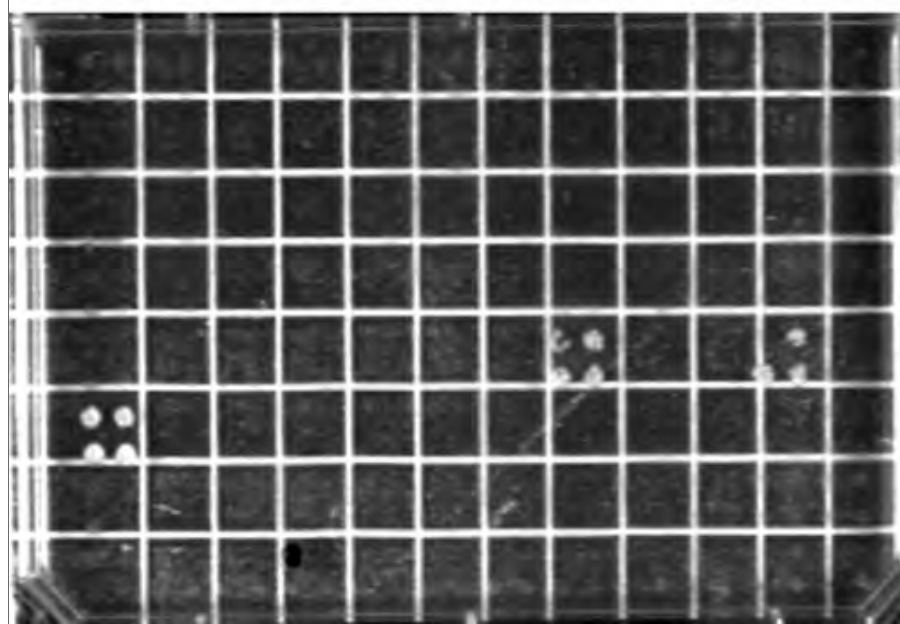

Random reference set

Baits: pGADCg

Preys: pGBKCg

0 mM 3AT

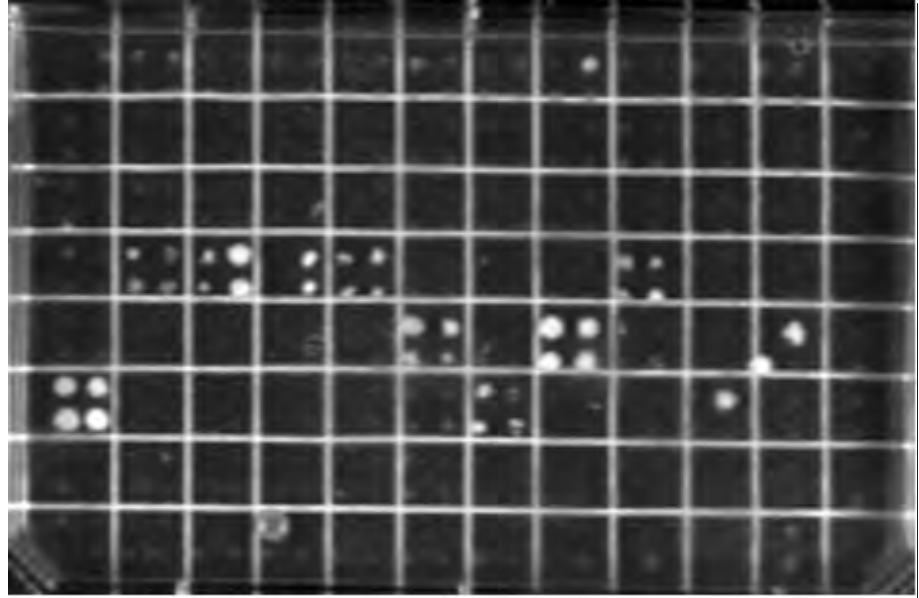

3 mM 3AT

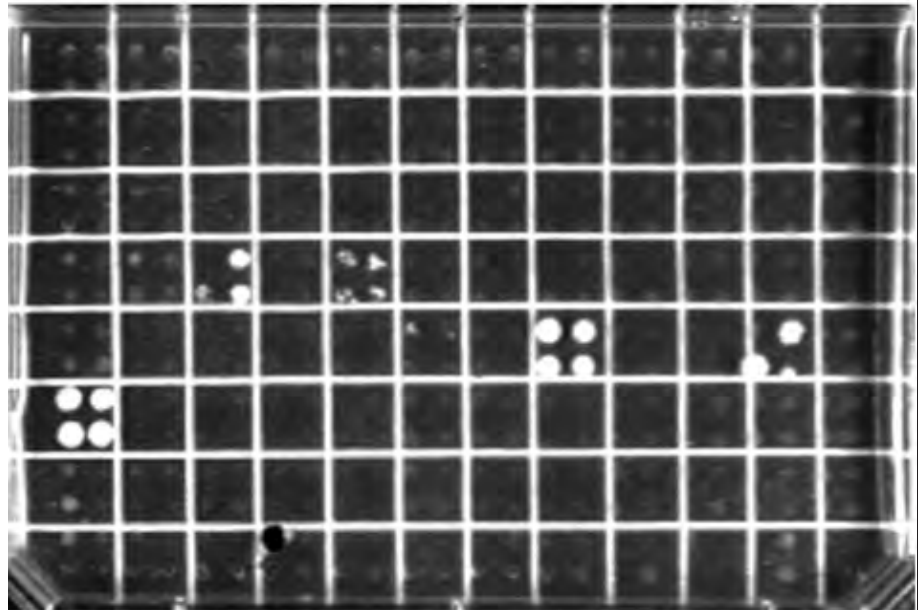

10 mM 3AT

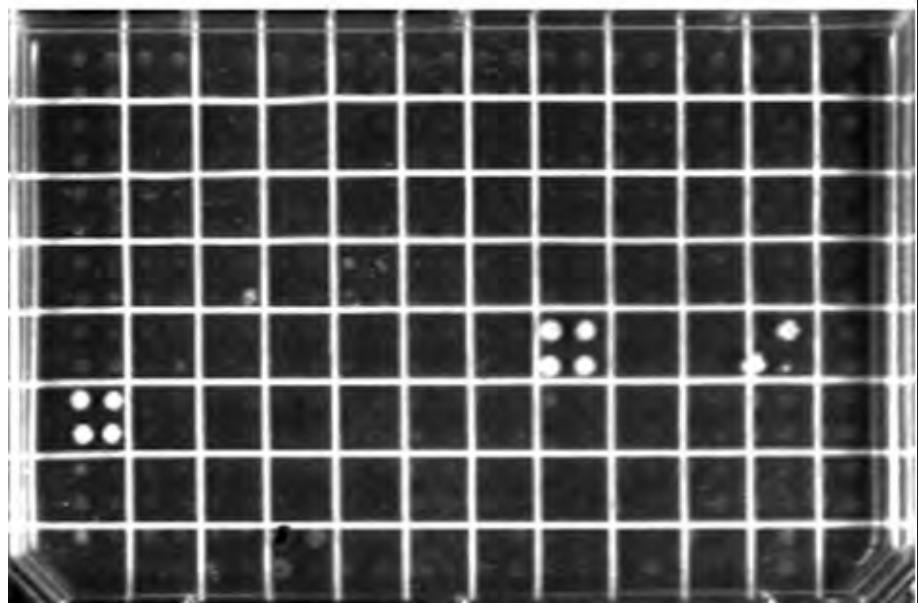

Random reference set

Baits: pGBGT7g

Preys: pGADCg

0 mM 3AT

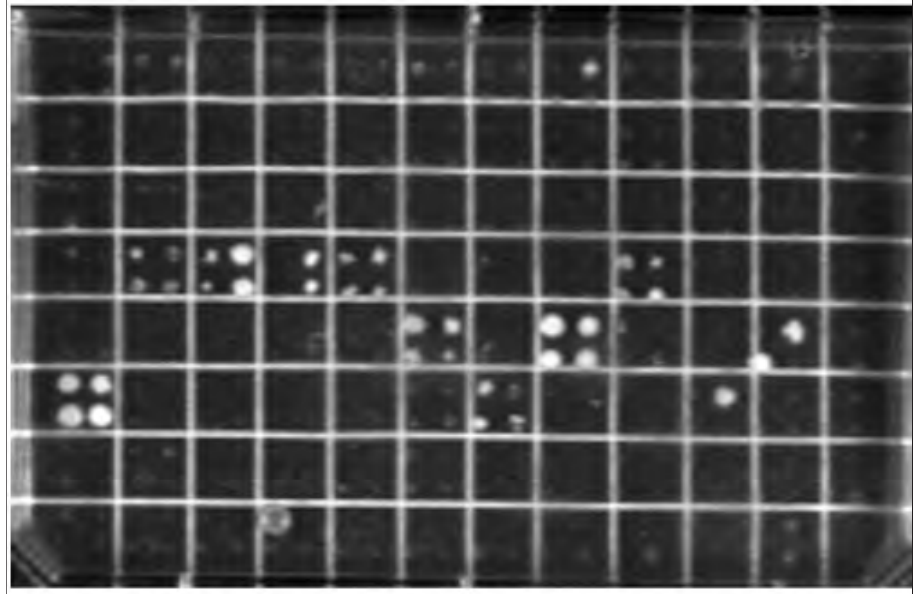

3 mM 3AT

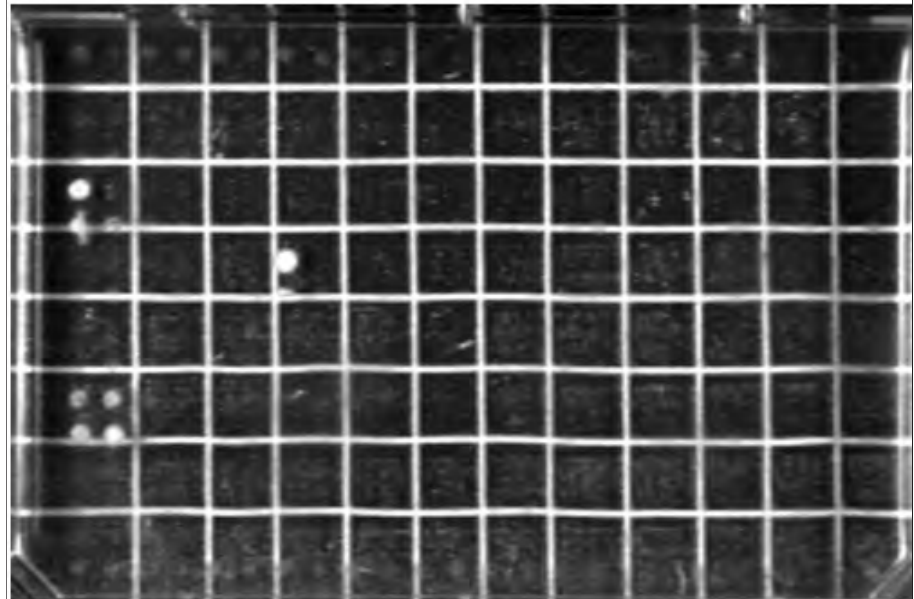

10 mM 3AT

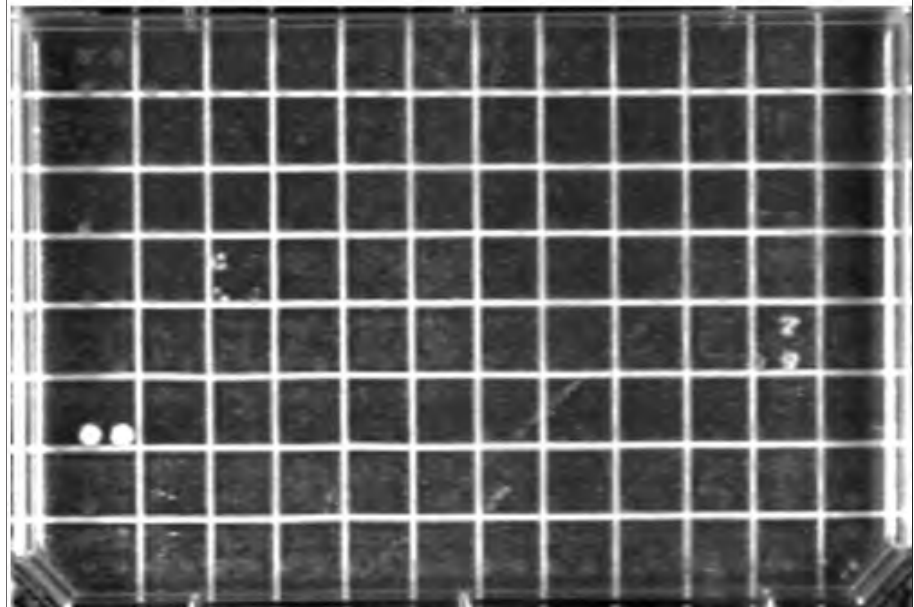

Random reference set

Baits: pGBT7g

Preys: pGADCg

0 mM 3AT

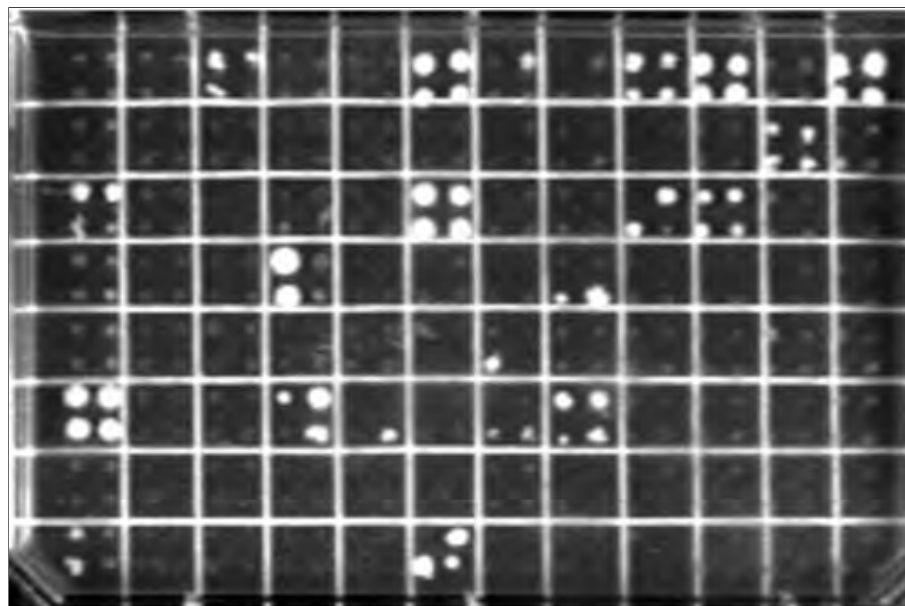

3 mM 3AT

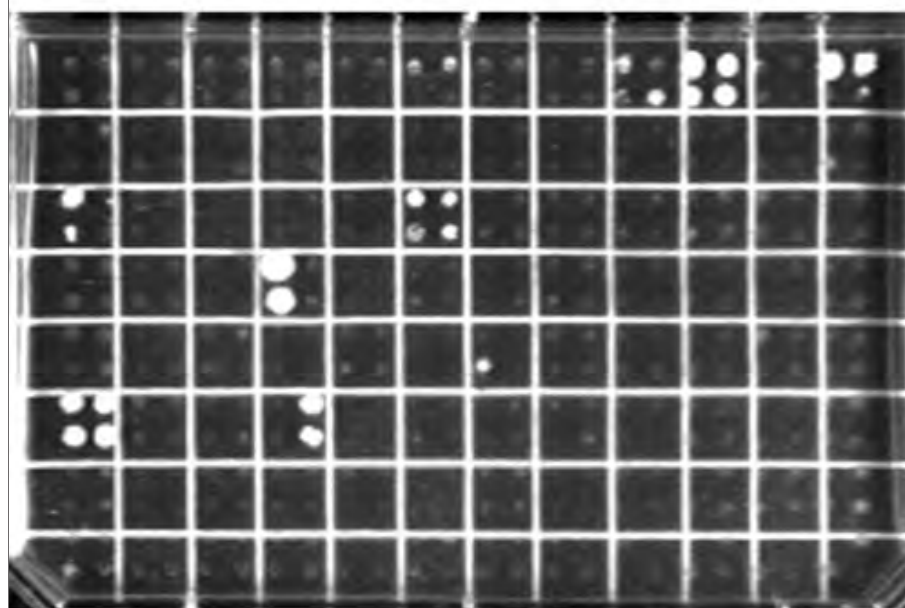

10 mM 3AT

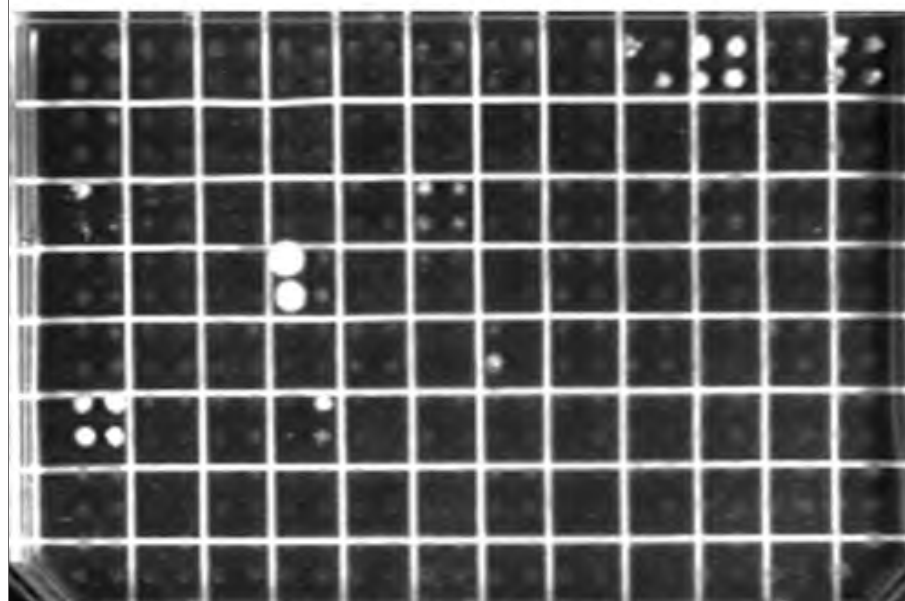

Random reference set

Baits: pGADCg

Preys: pGBGT7g

0 mM 3AT

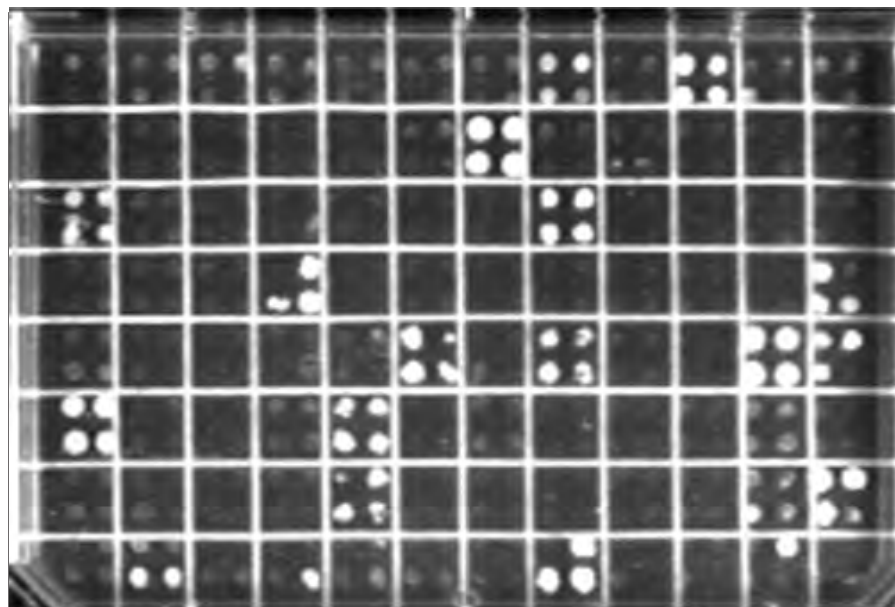

3 mM 3AT

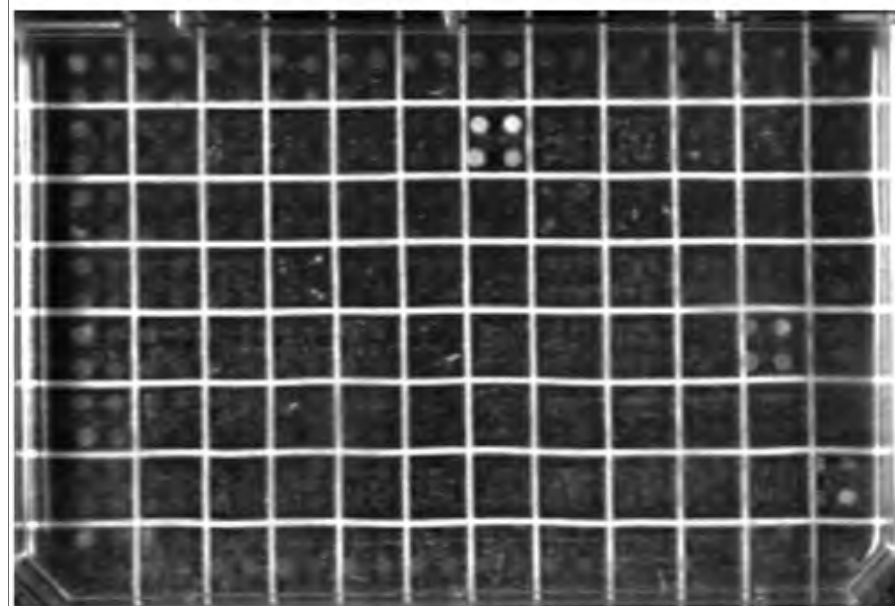

10 mM 3AT

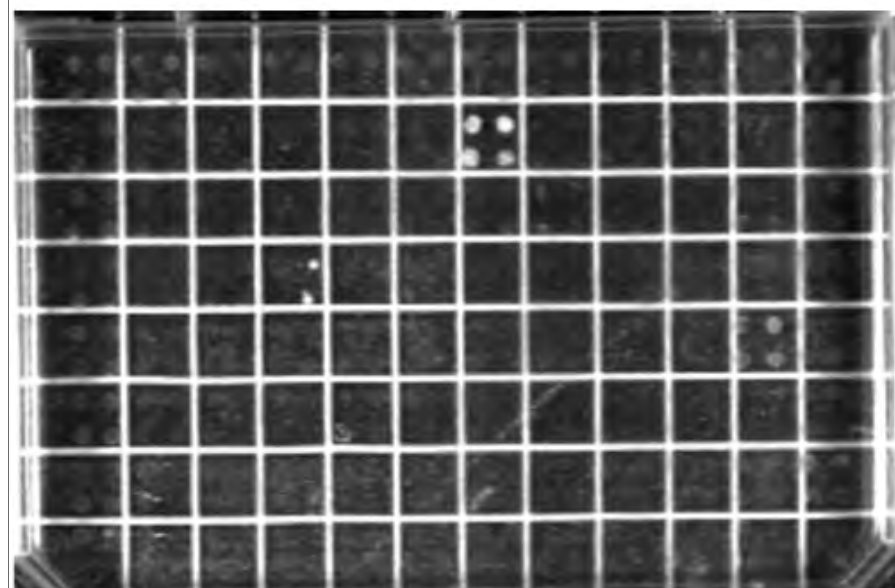

Random reference set

Baits: pGADCg

Preys: pGBGT7g

0 mM 3AT

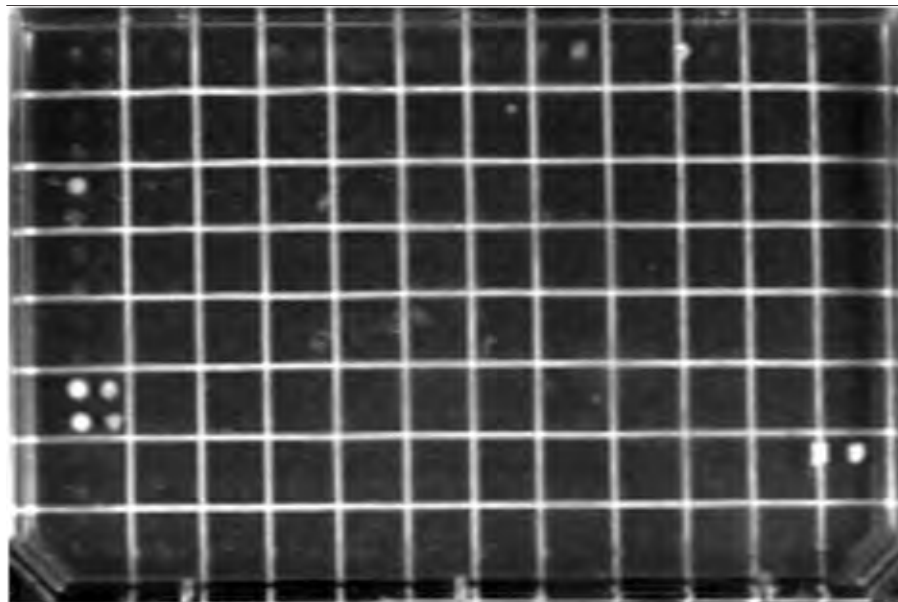

3 mM 3AT

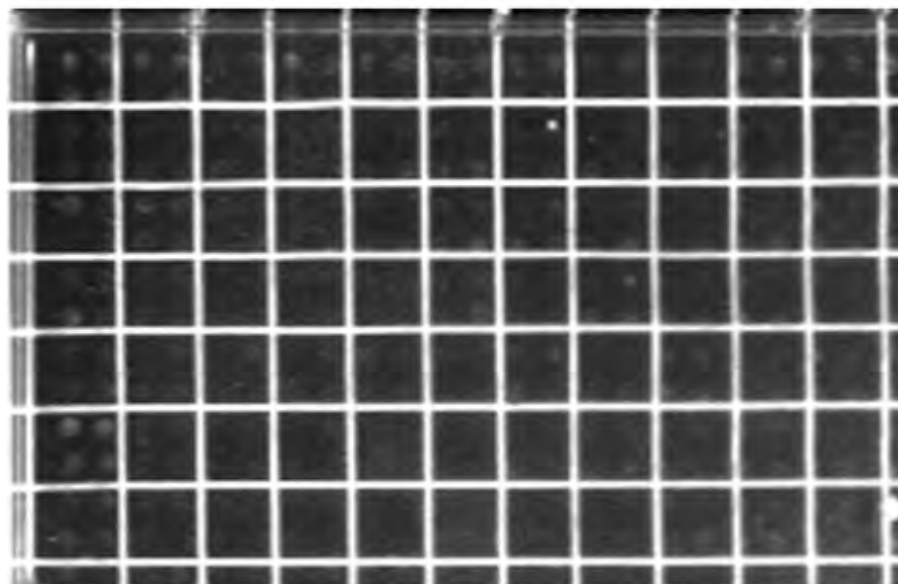

10 mM 3AT

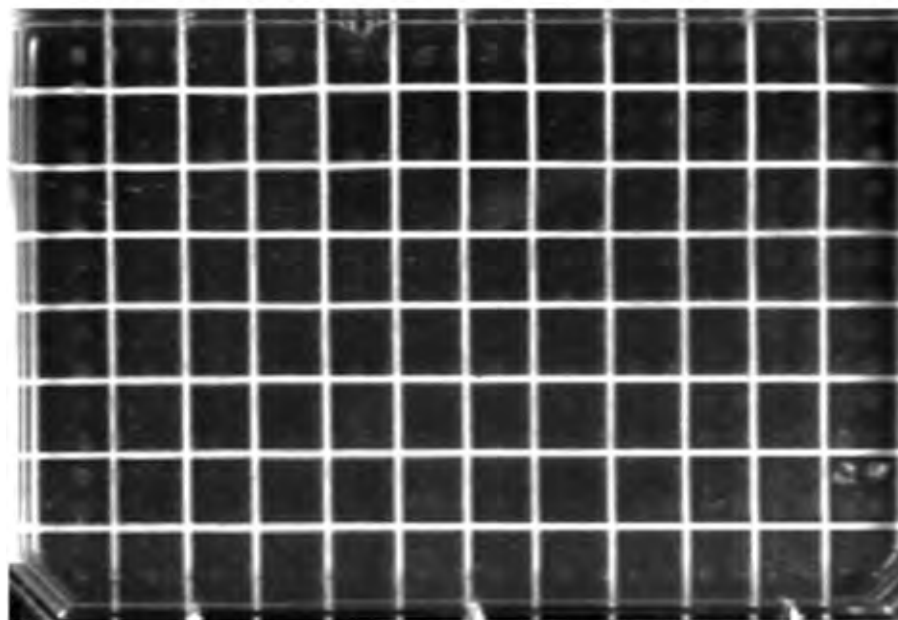



Random reference set

Baits: pGBKCg

Preys: pGADT7g

0 mM 3AT

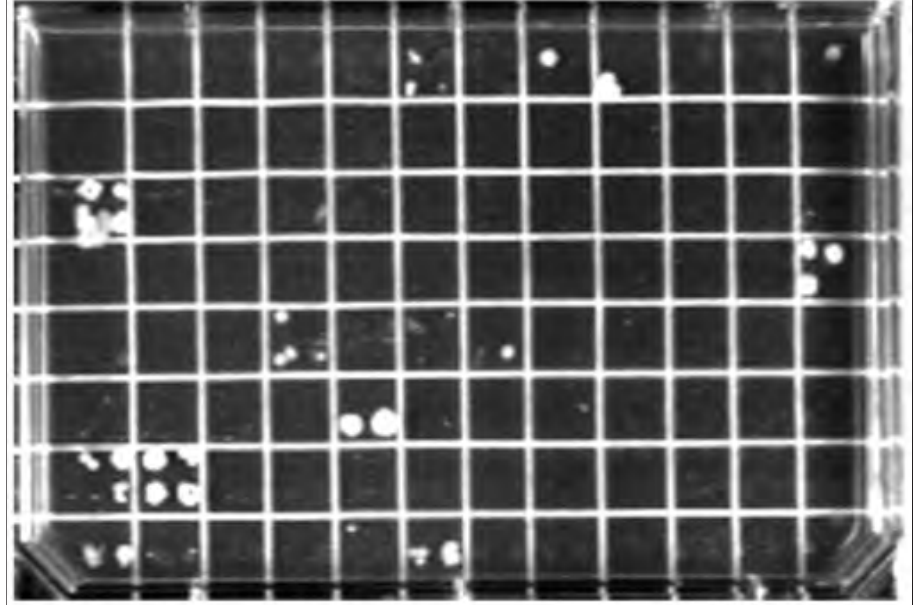

3 mM 3AT

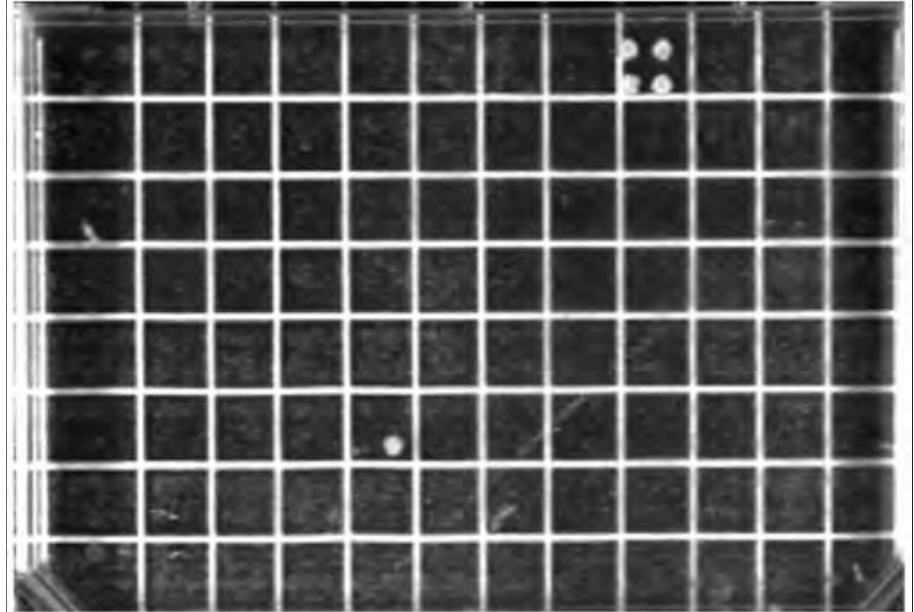

10 mM 3AT

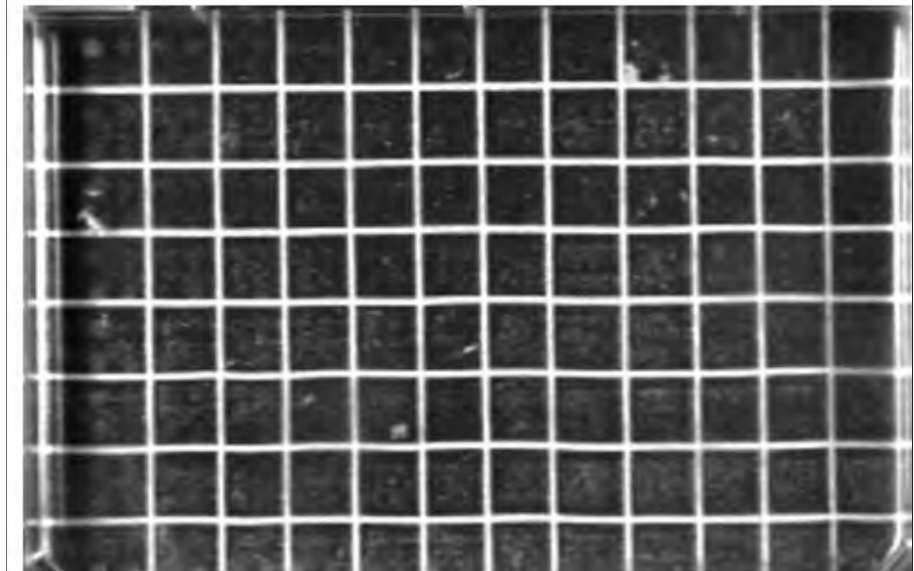

Random reference set  
Baits: pGBKCg  
Preys: pGADT7g

0 mM 3AT

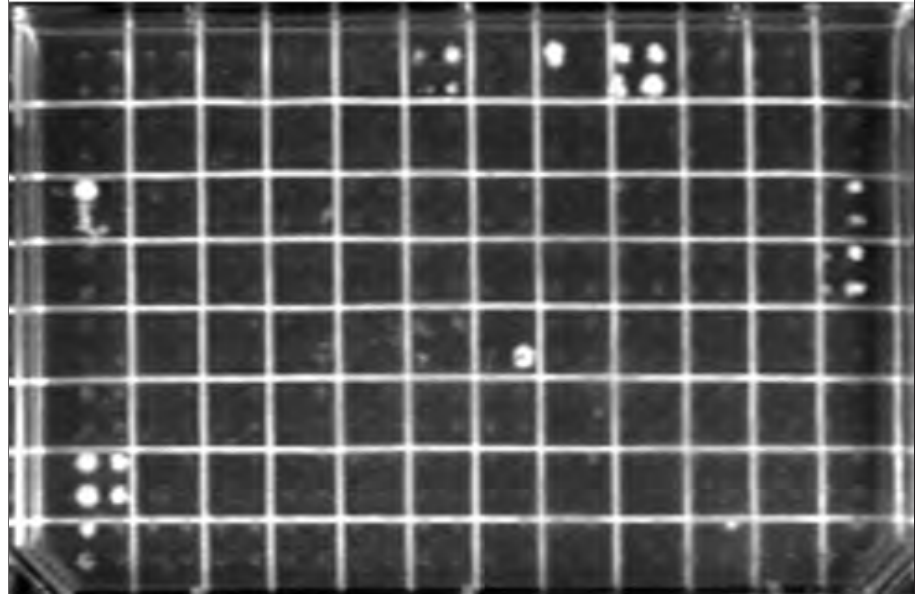

3 mM 3AT

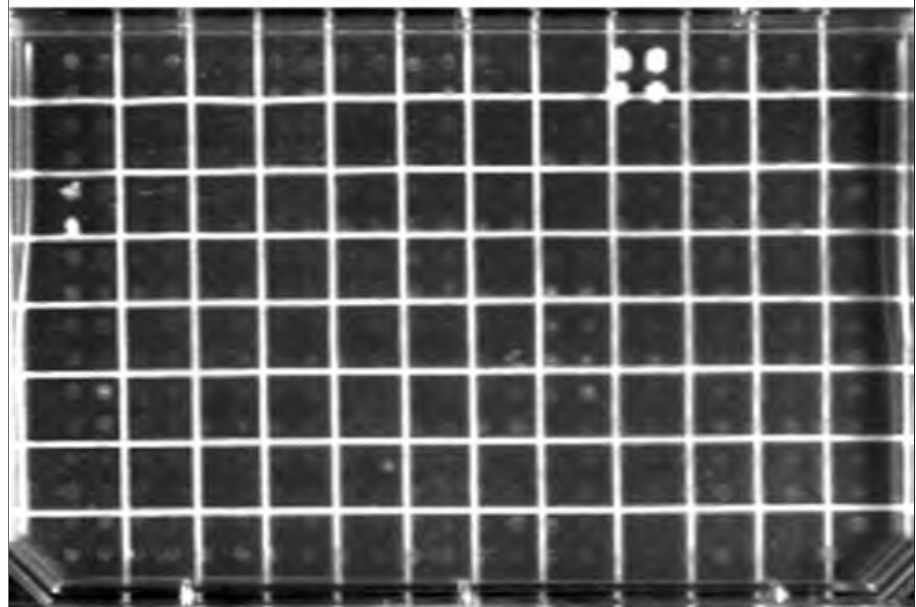

10 mM 3AT

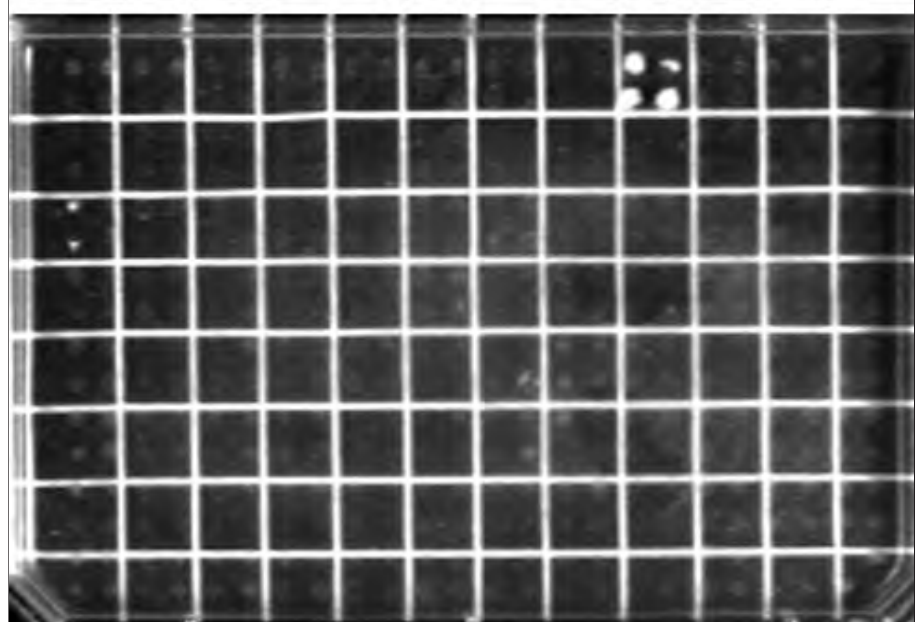

Random reference set

Baits: pGADT7g

Preys: pGBKCg

0 mM 3AT

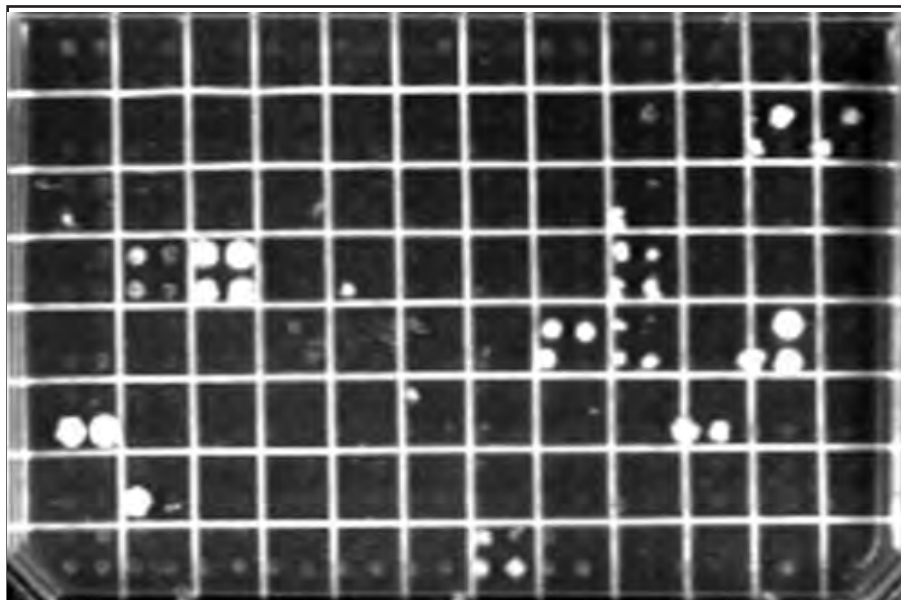

3 mM 3AT

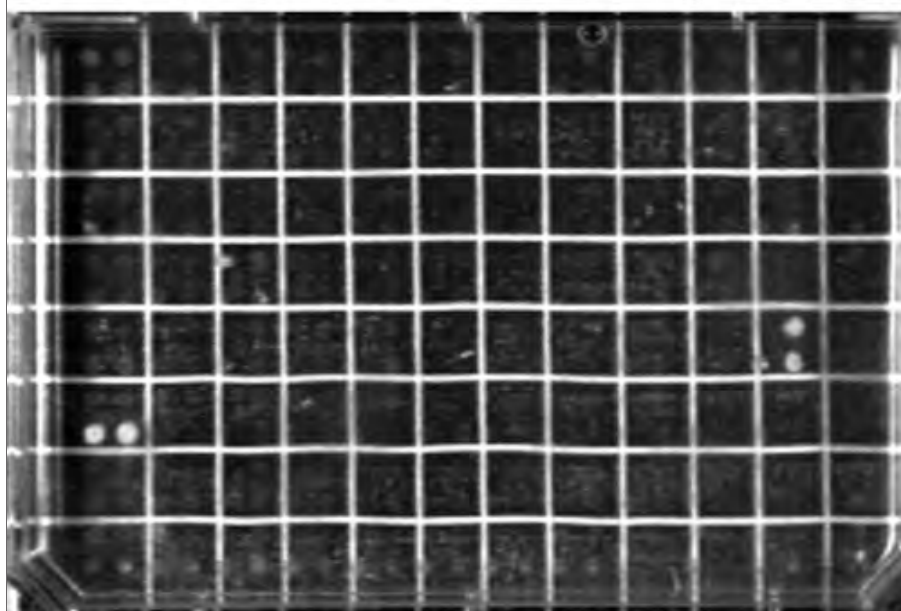

10 mM 3AT

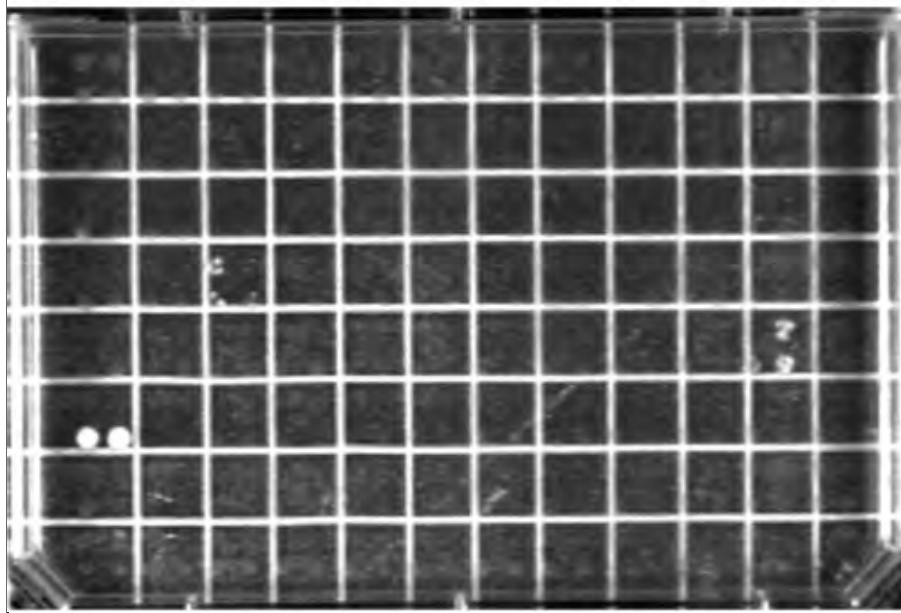

Random reference set

Baits: pGADT7g

Preys: pGBKCg

0 mM 3AT

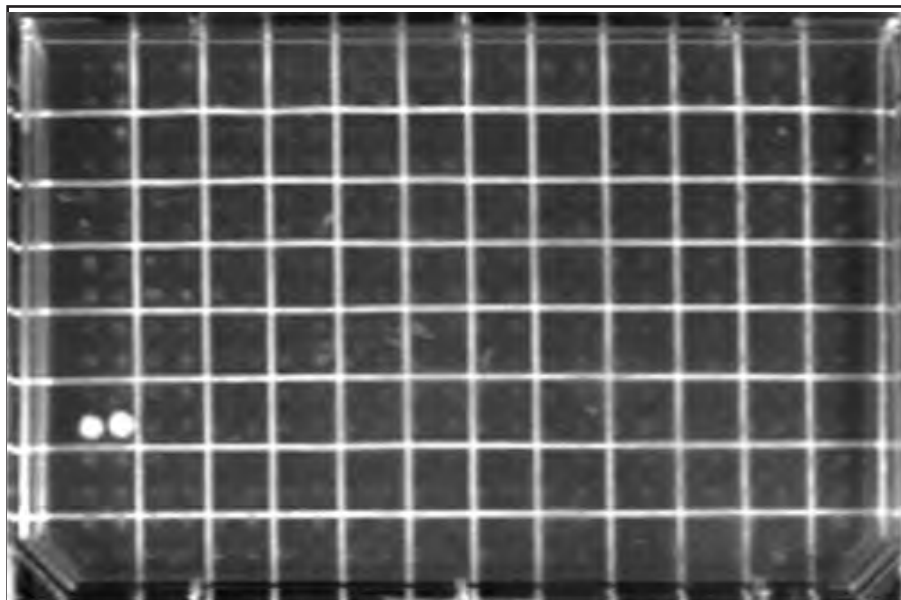

3 mM 3AT

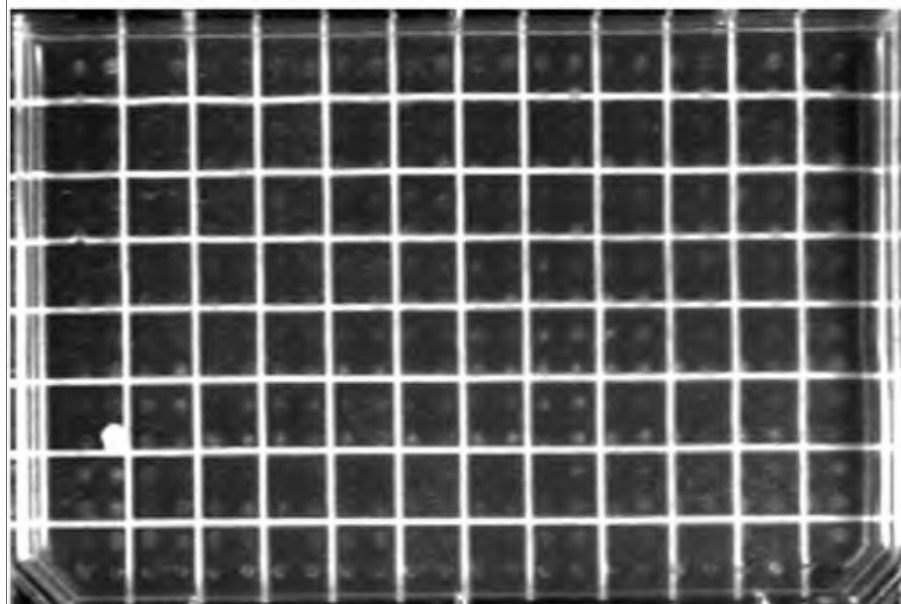

10 mM 3AT

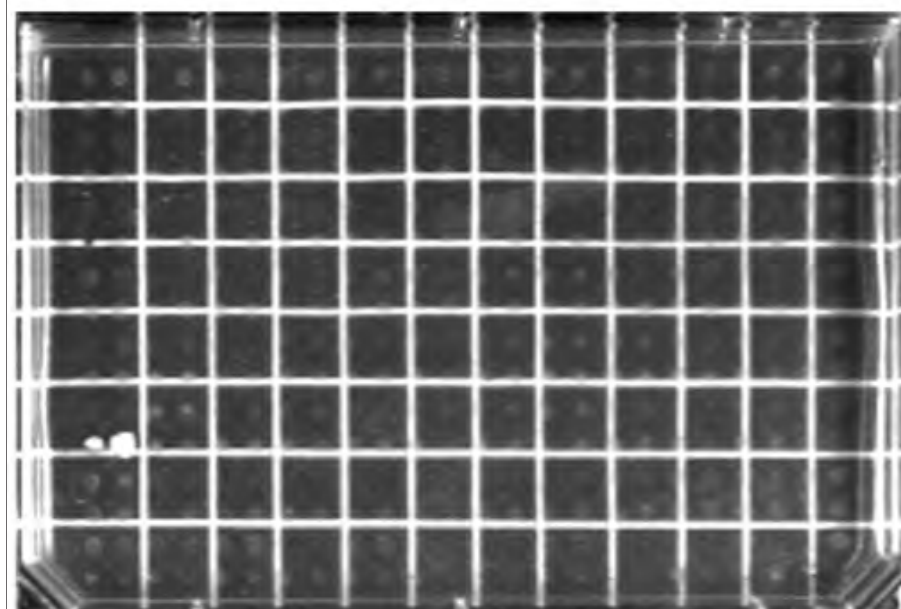

## Positive reference set - Autoactivation tests

Baits: pDEST32

Preys: pDEST22

(empty vector)

0 mM 3AT

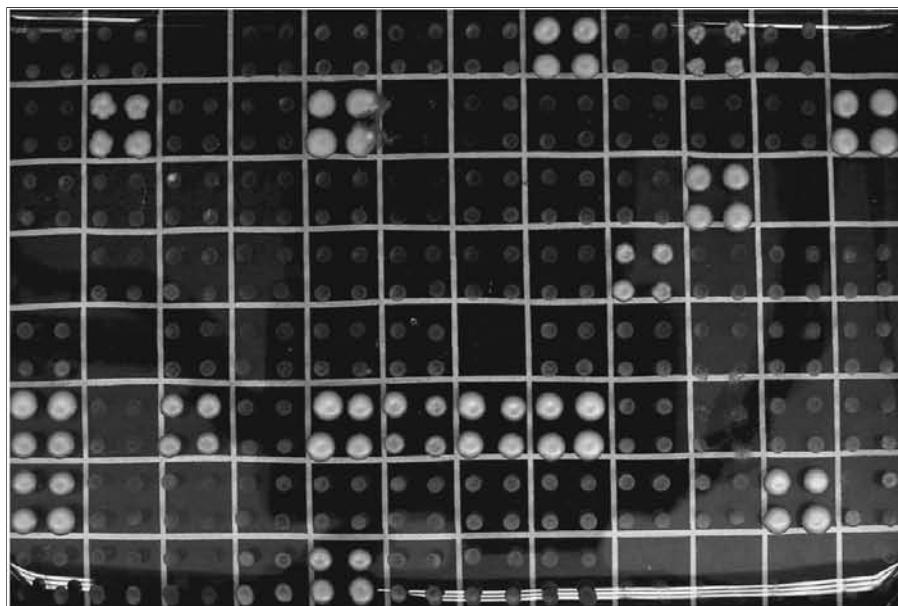

3 mM 3AT

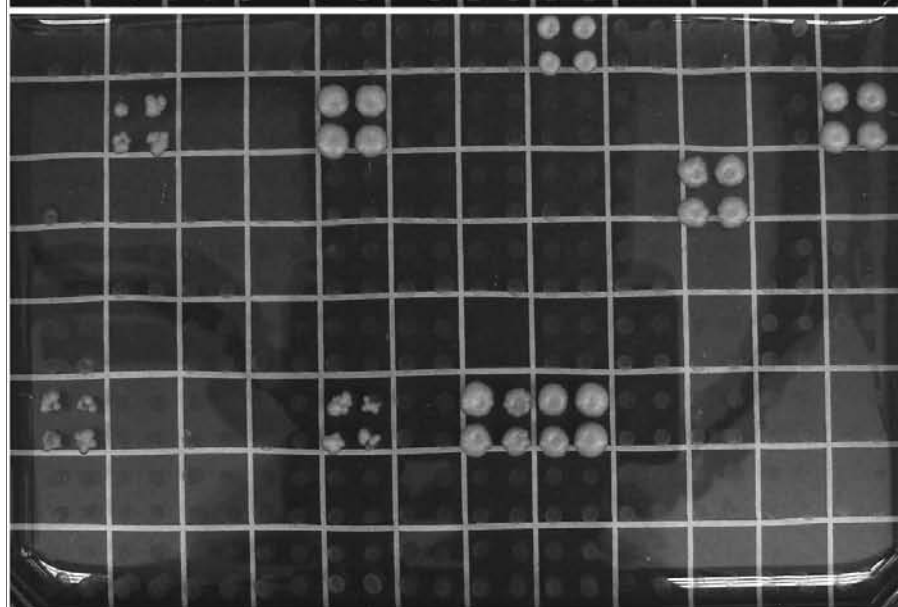

10 mM 3AT

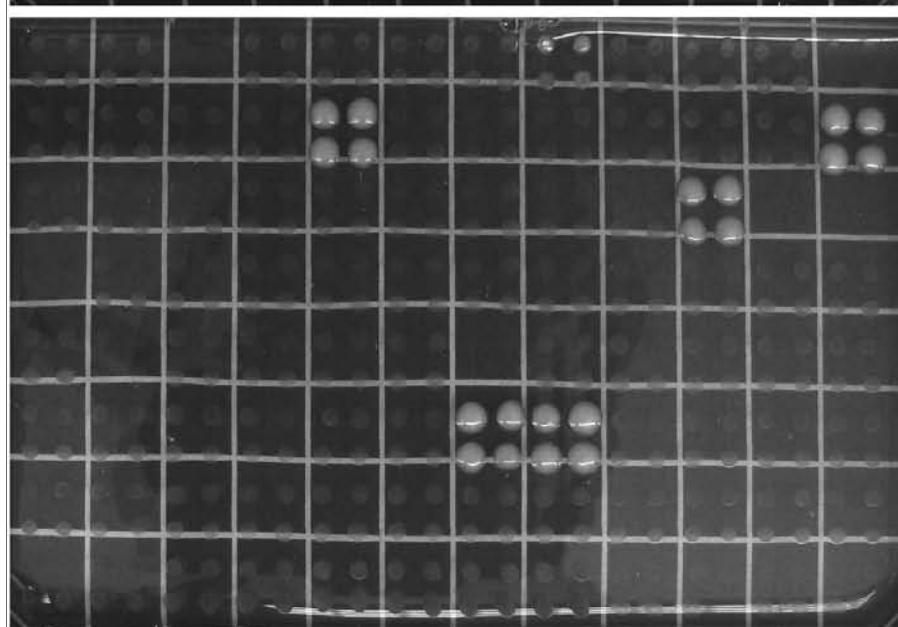

Positive reference set - Autoactivation tests

Baits: pDEST32

Preys: pDEST22

(empty vector)

0 mM 3AT

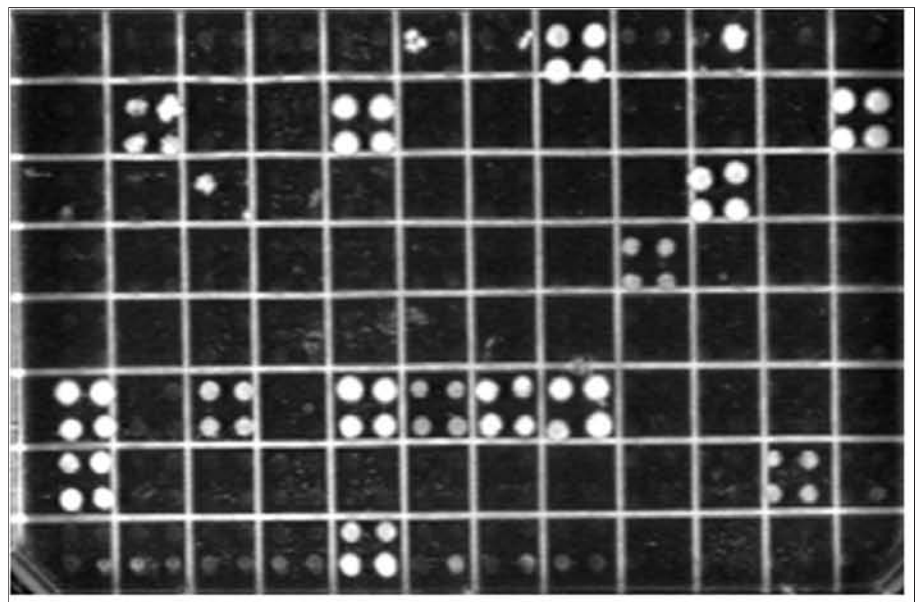

3 mM 3AT

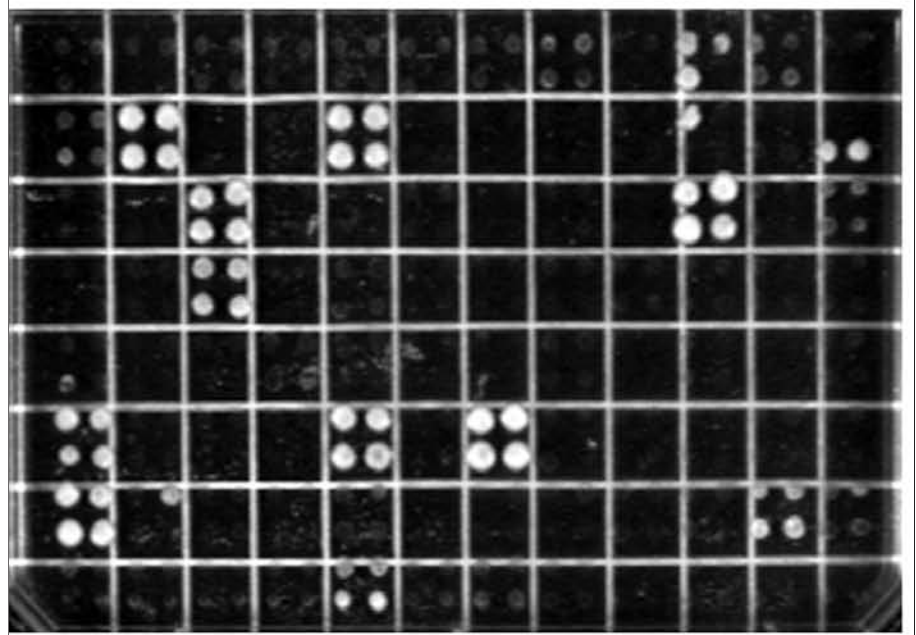

10 mM 3AT

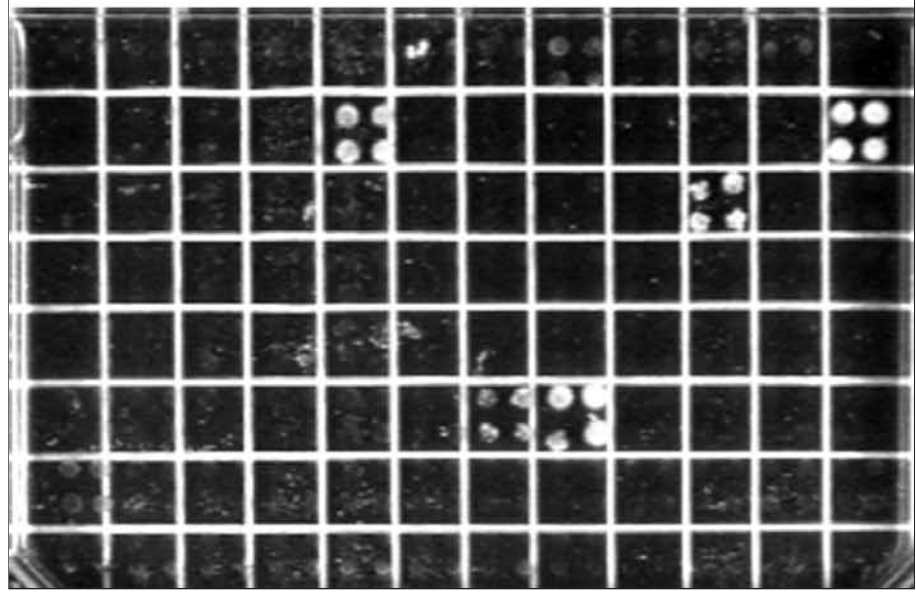

Positive reference set - Autoactivation tests

Baits: pDEST22

Preys: pDEST32

(empty vector)

0 mM 3AT

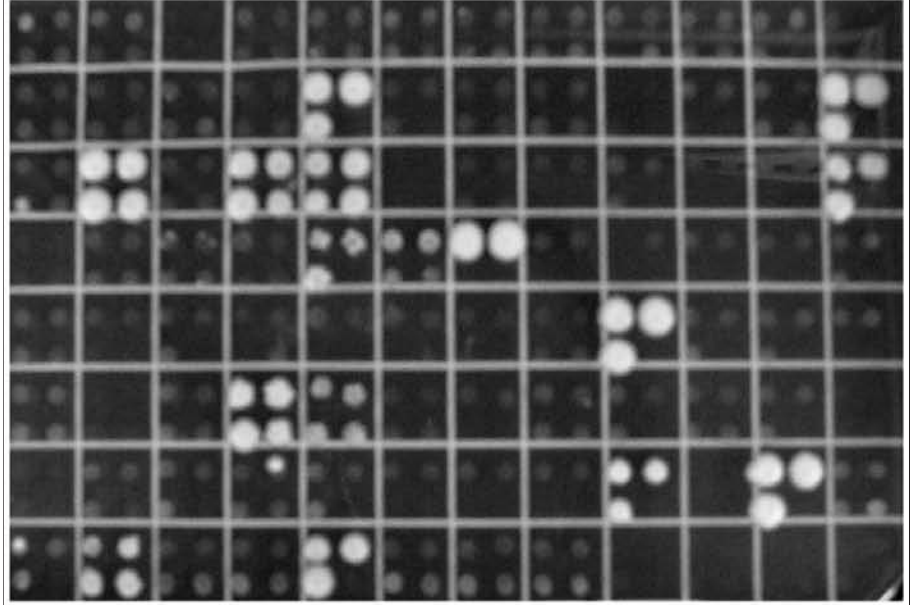

3 mM 3AT

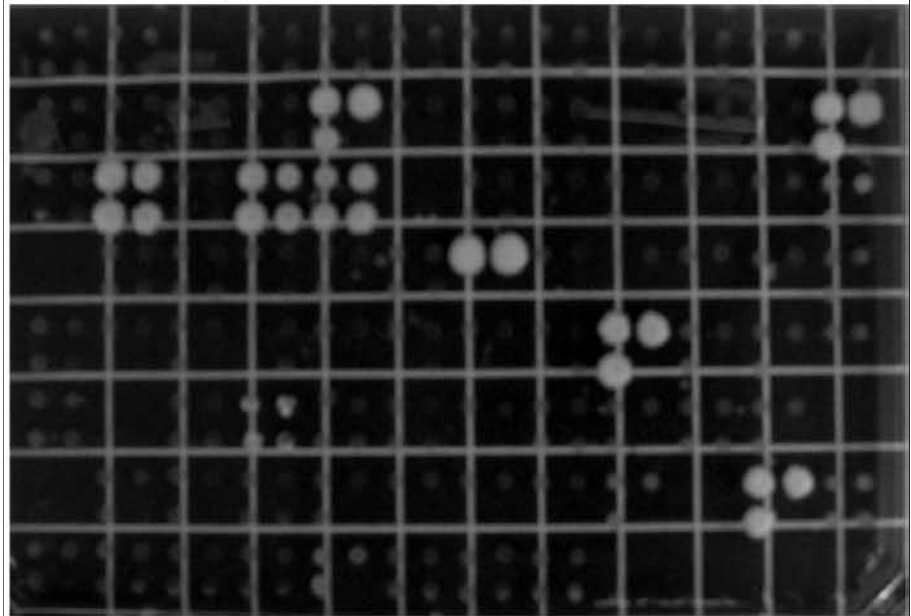

10 mM 3AT

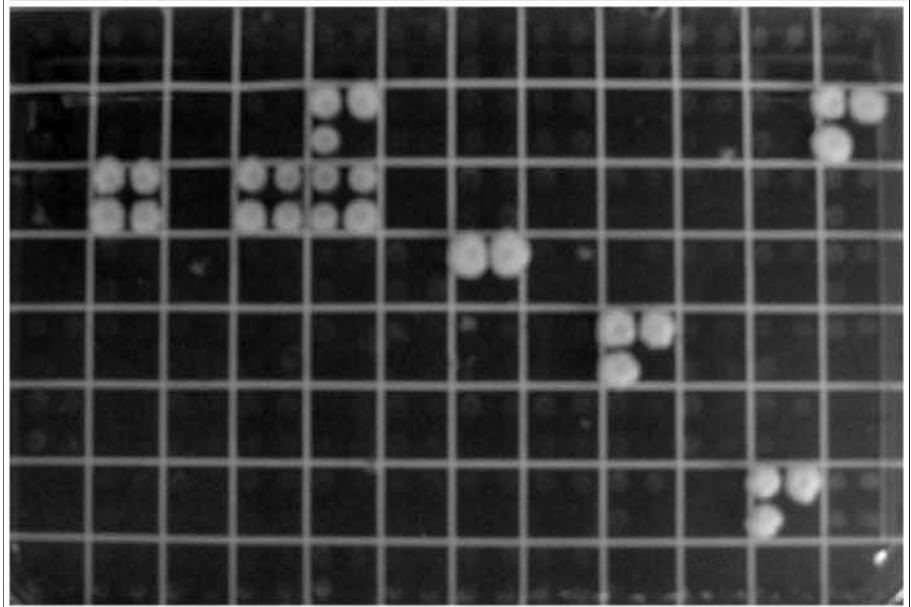

## Positive reference set - Autoactivation tests

Baits: pDEST22

Preys: pDEST32

(empty vector)

0 mM 3AT

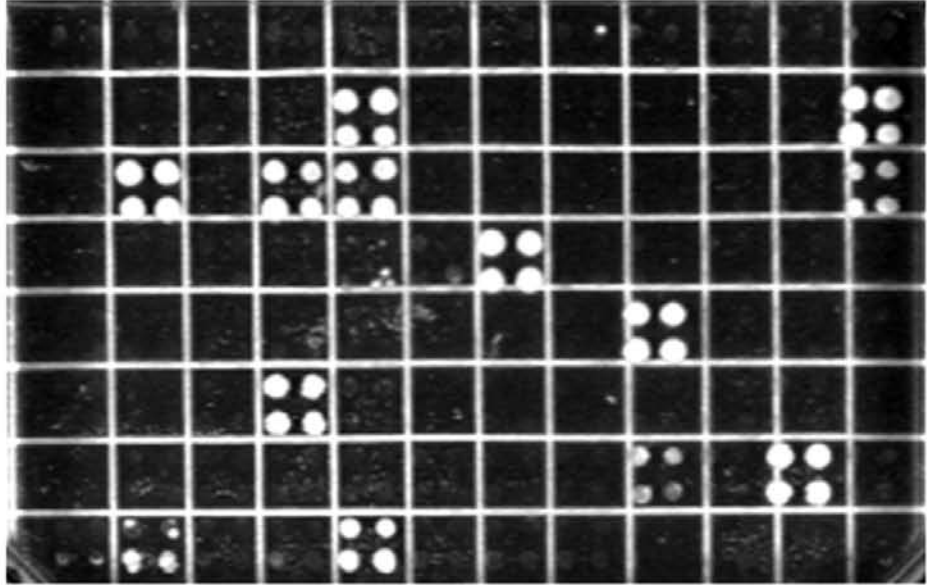

3 mM 3AT

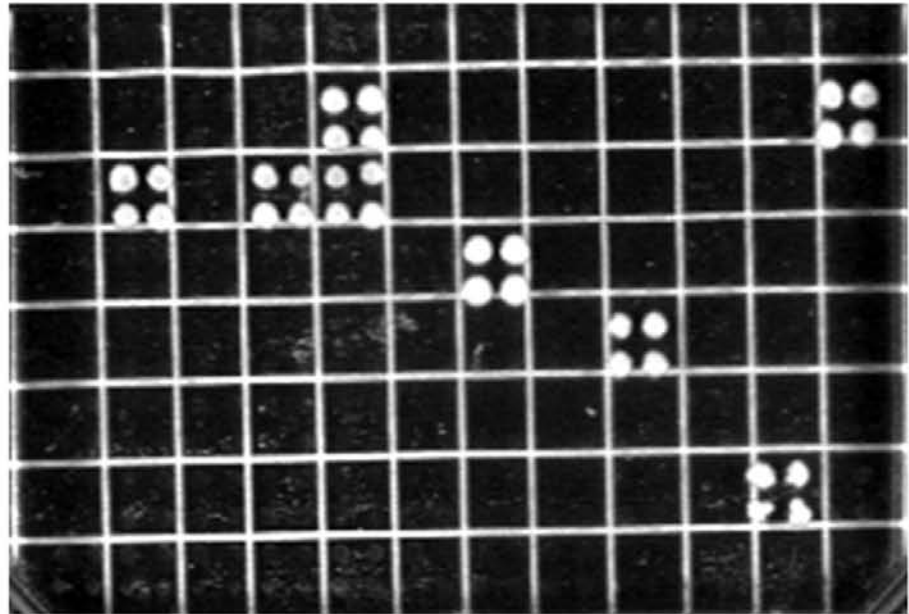

10 mM 3AT

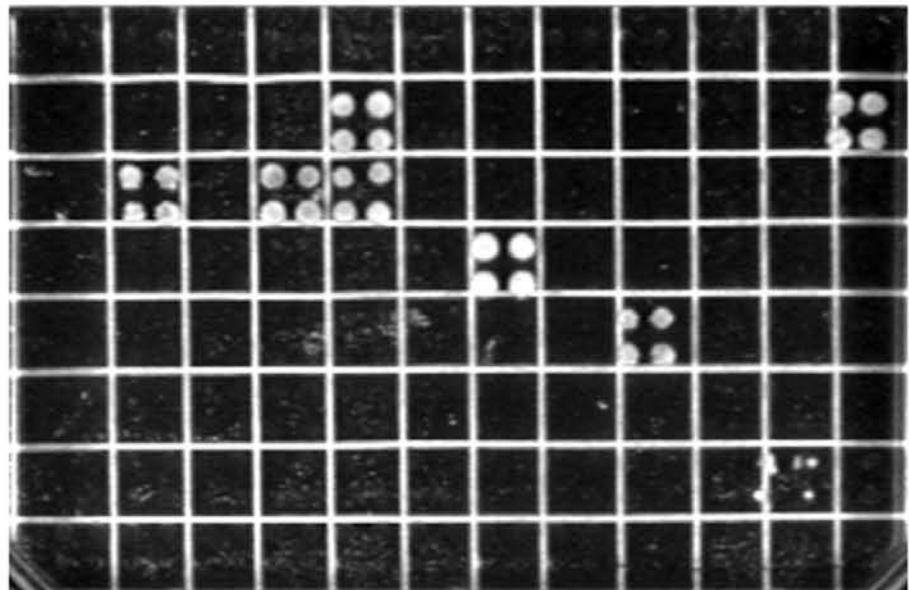



## Positive reference set - Autoactivation tests

Baits: pGBGT7g

Preys: pGADT7g  
(empty vector)

0 mM 3AT

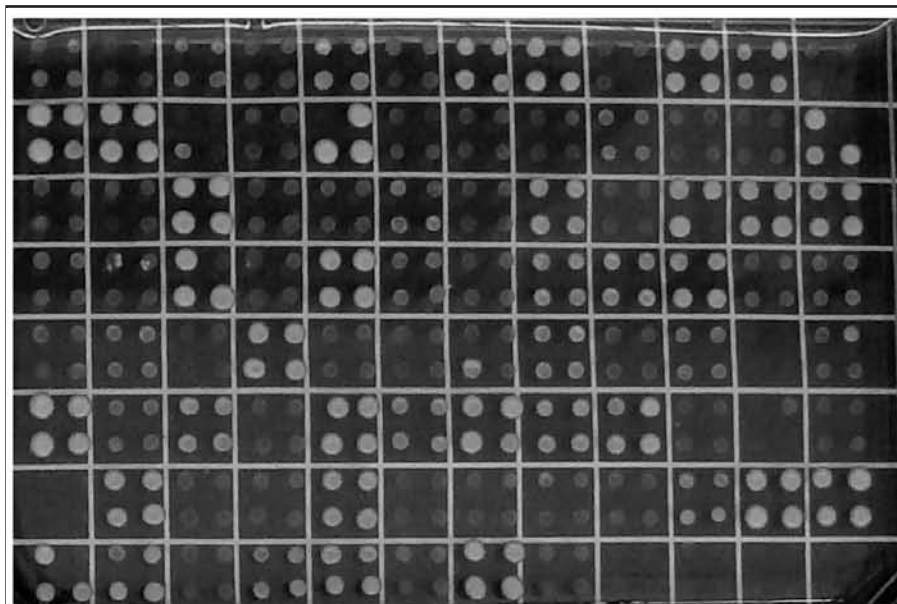

3 mM 3AT

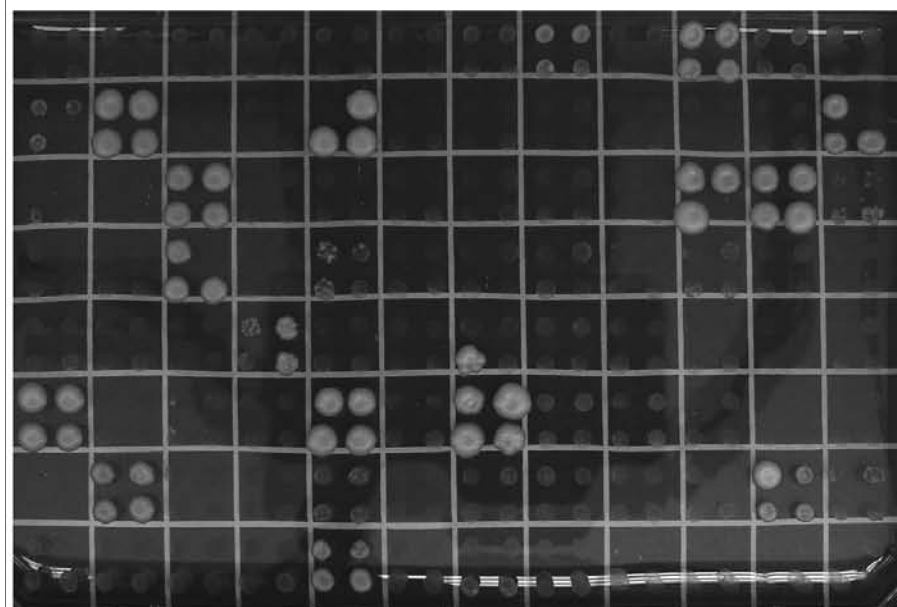

10 mM 3AT

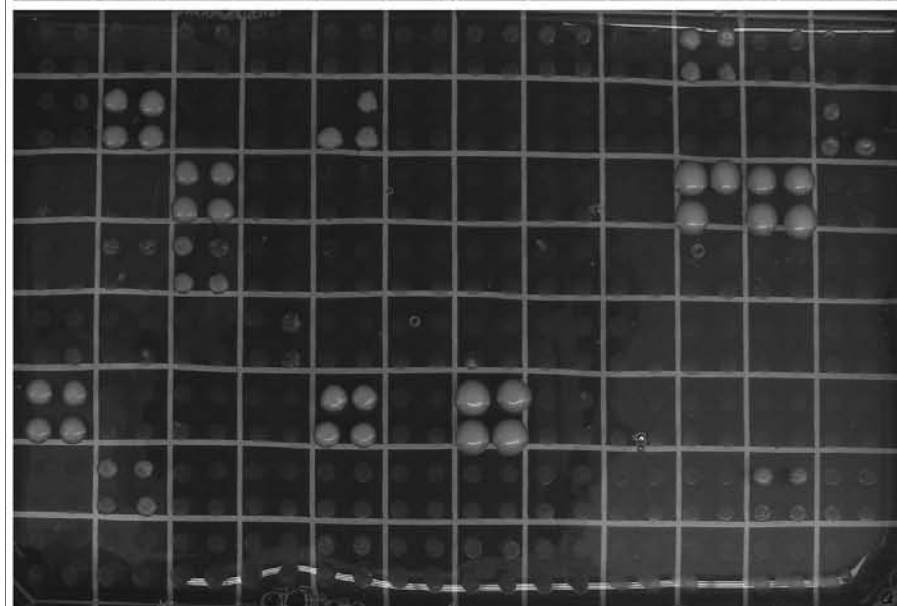

## Positive reference set - Autoactivation tests

Baits: pGBGT7g

Preys: pGADT7g

(empty vector)

0 mM 3AT

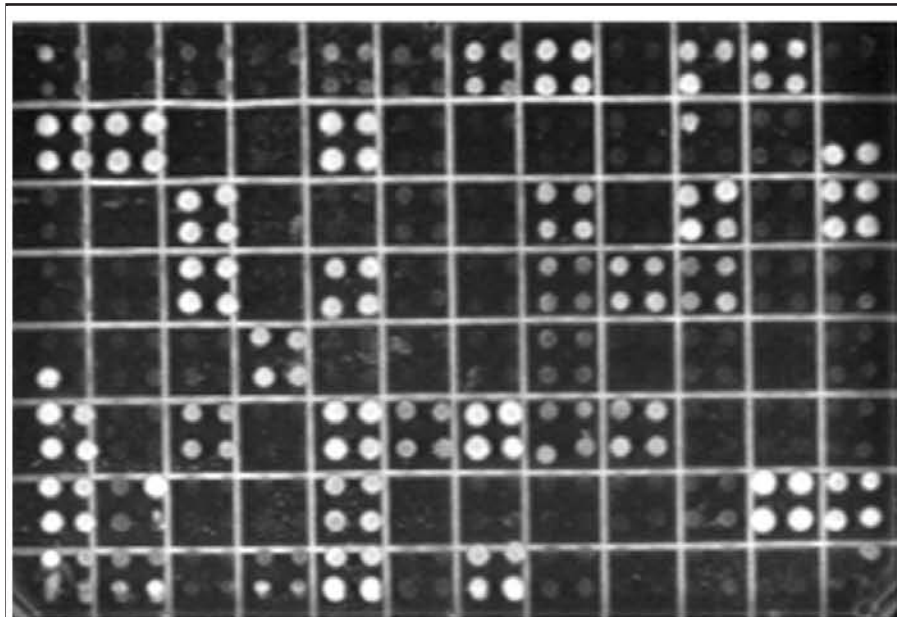

3 mM 3AT

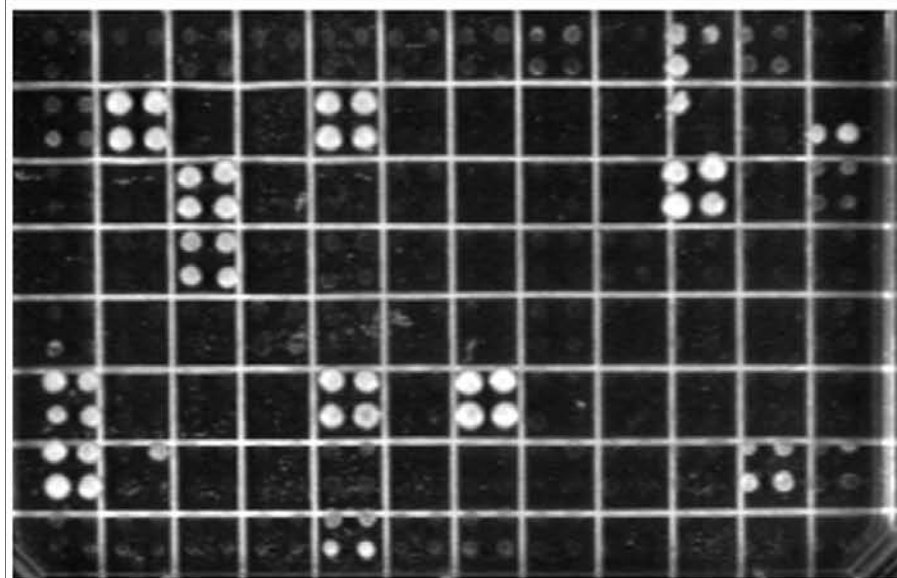

10 mM 3AT

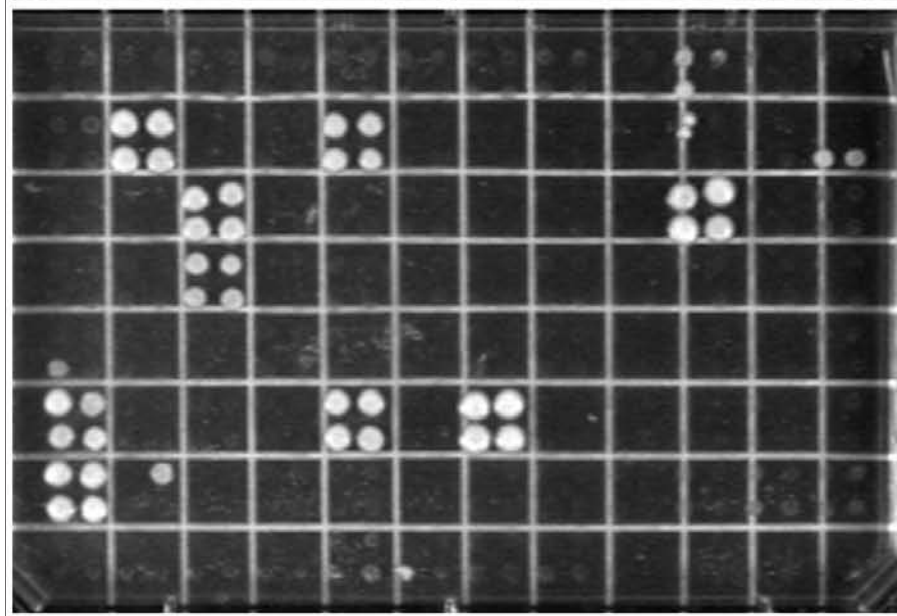

Positive reference set - Autoactivation tests

Baits: pGADT7g

Preys: pGBGT7g  
(empty vector)

0 mM 3AT

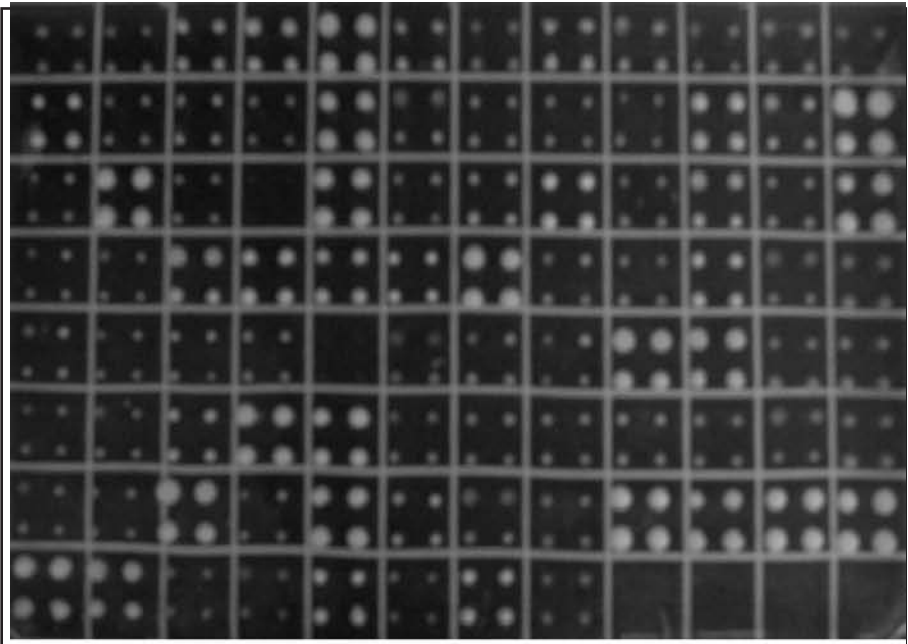

3 mM 3AT

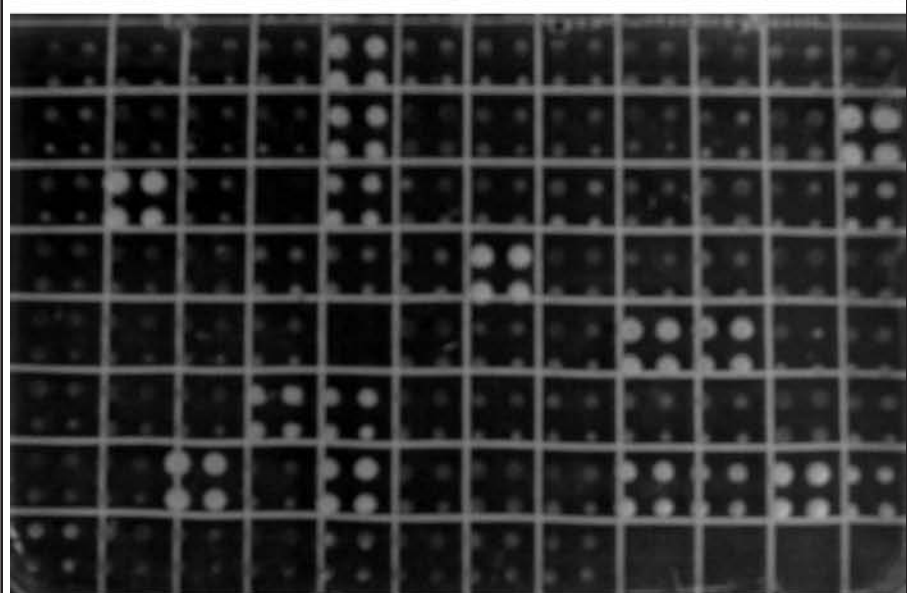

10 mM 3AT

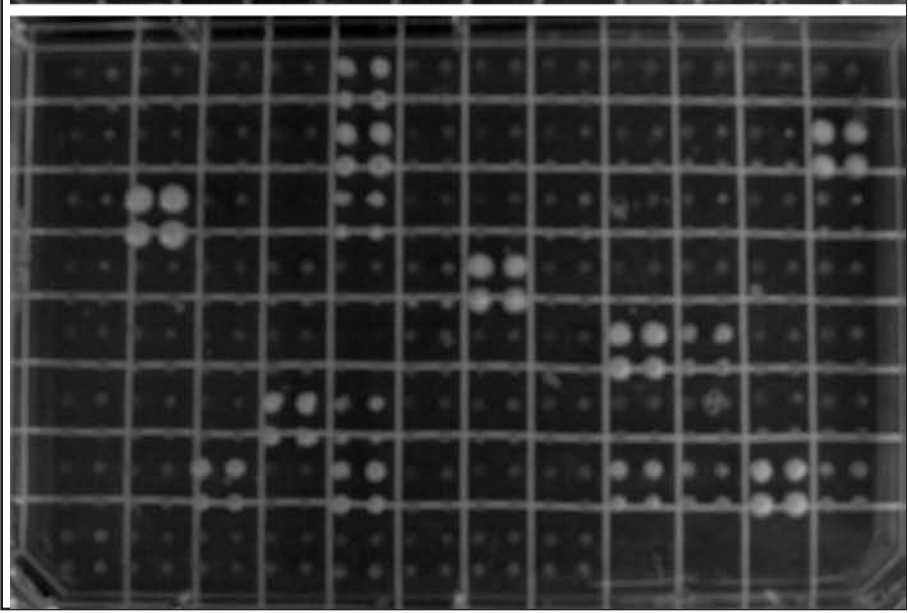

## Positive reference set - Autoactivation tests

Baits: pGADT7g

Preys: pGBGT7g  
(empty vector)

0 mM 3AT

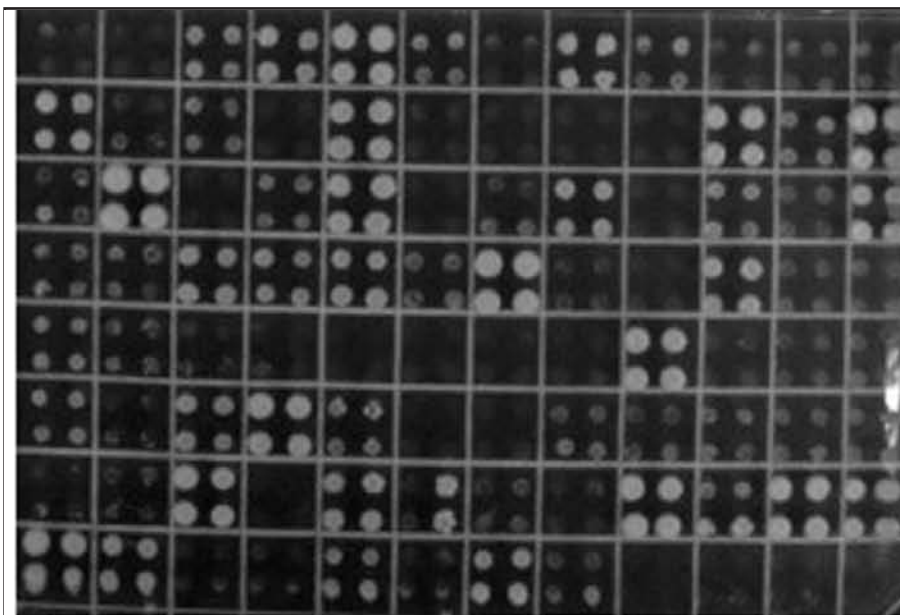

3 mM 3AT

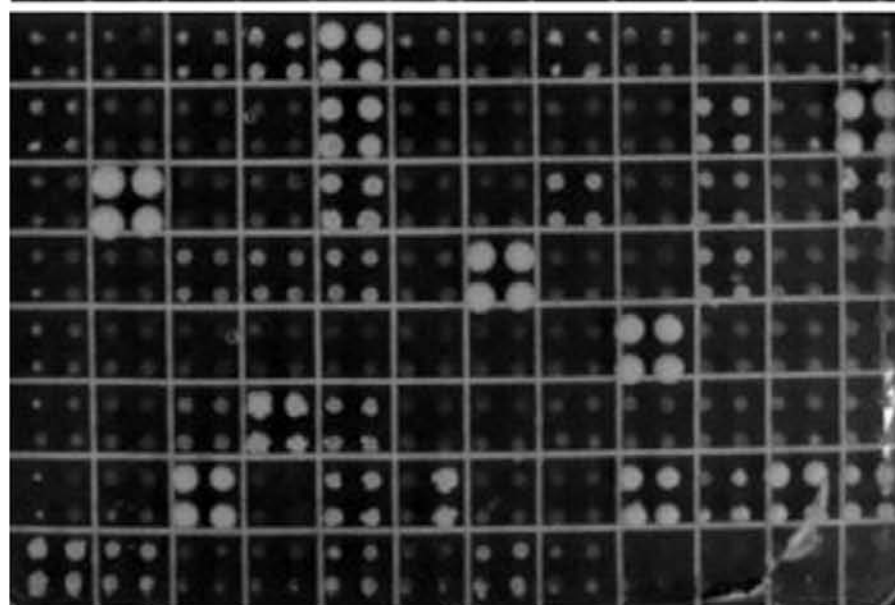

10 mM 3AT

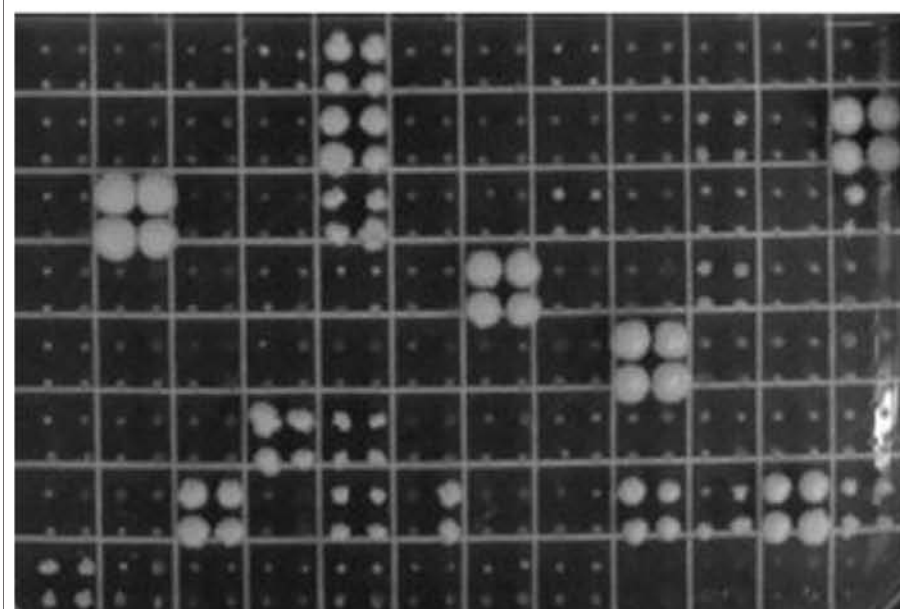

## Positive reference set - Autoactivation tests

Baits: pGBKcG

Preys: pGADCg

(empty vector)

0 mM 3AT

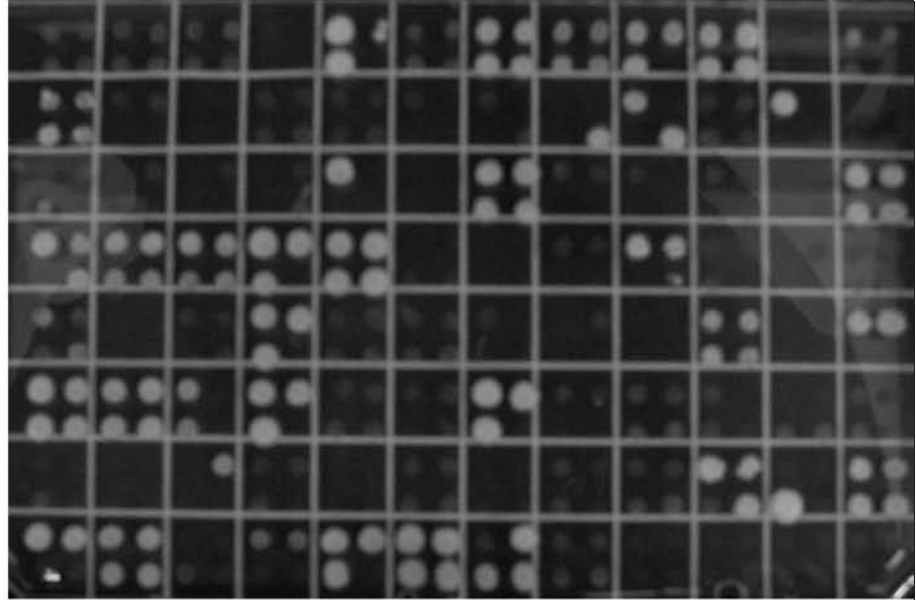

3 mM 3AT

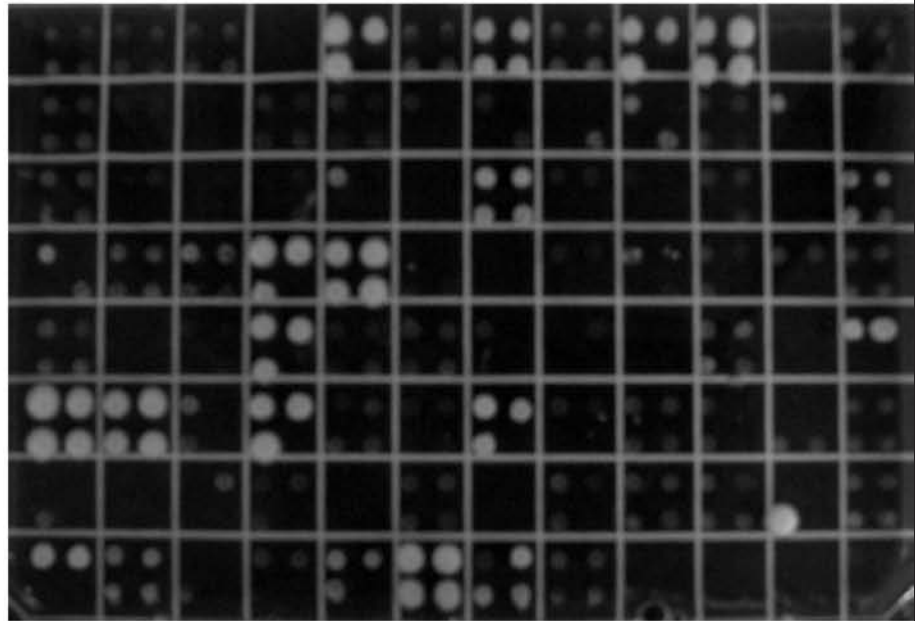

10 mM 3AT

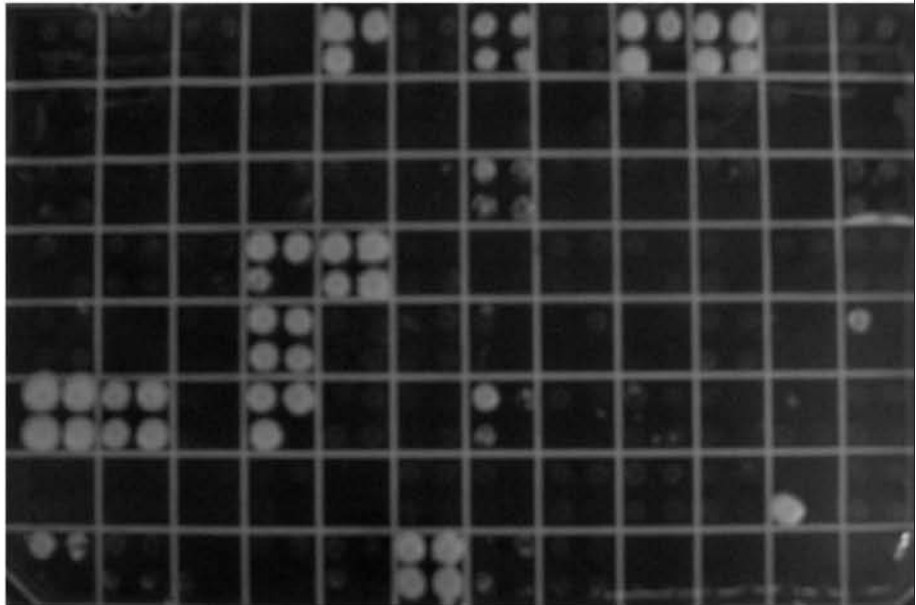

## Positive reference set - Autoactivation tests

Baits: pGBKcG

Preys: pGADCg

(empty vector)

0 mM 3AT

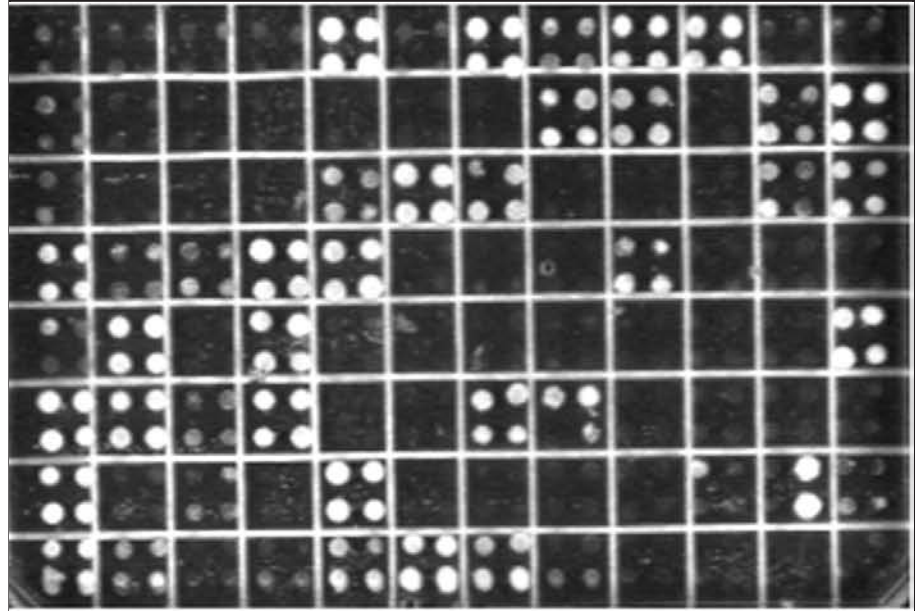

3 mM 3AT

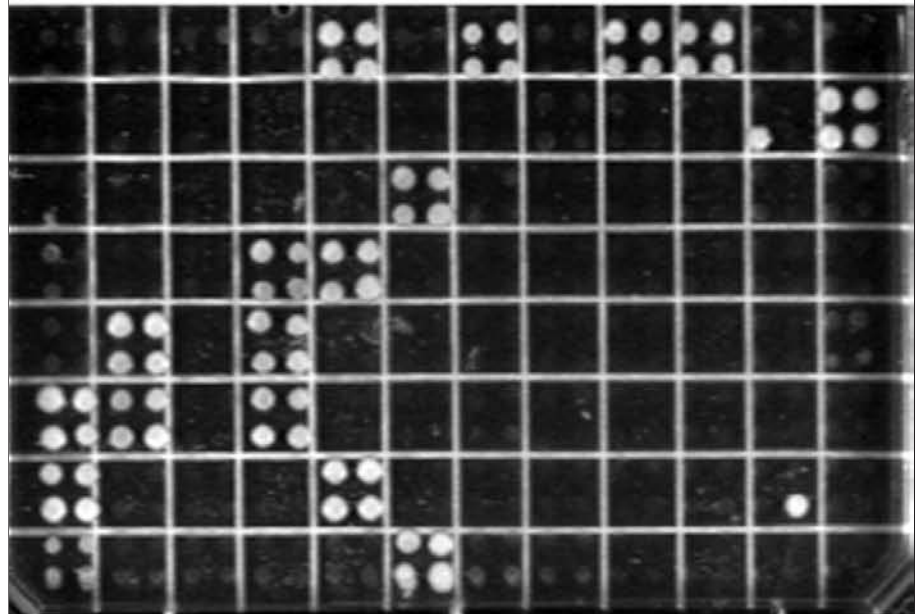

10 mM 3AT

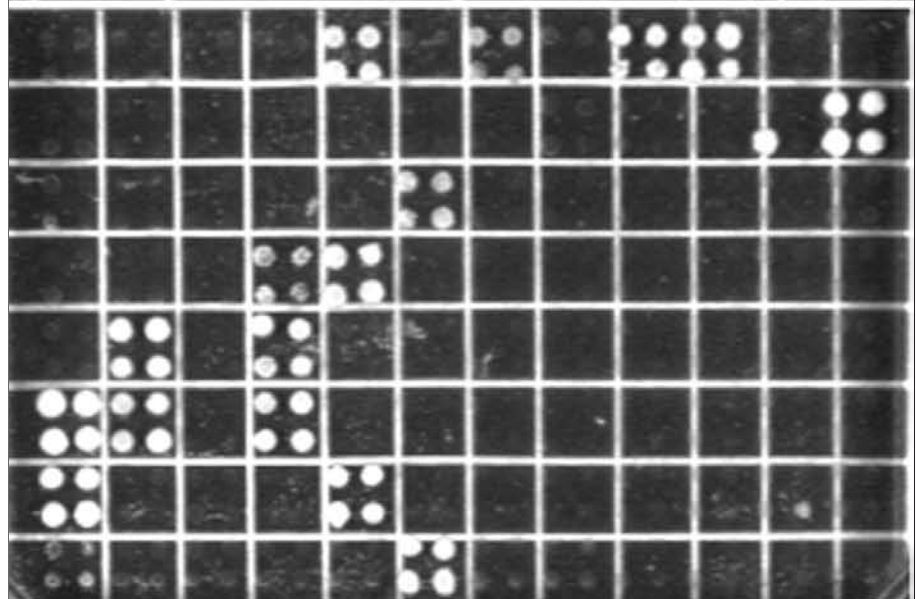

## Positive reference set - Autoactivation tests

Baits: pGADCg

Preys: pGBKCg

(empty vector)

0 mM 3AT

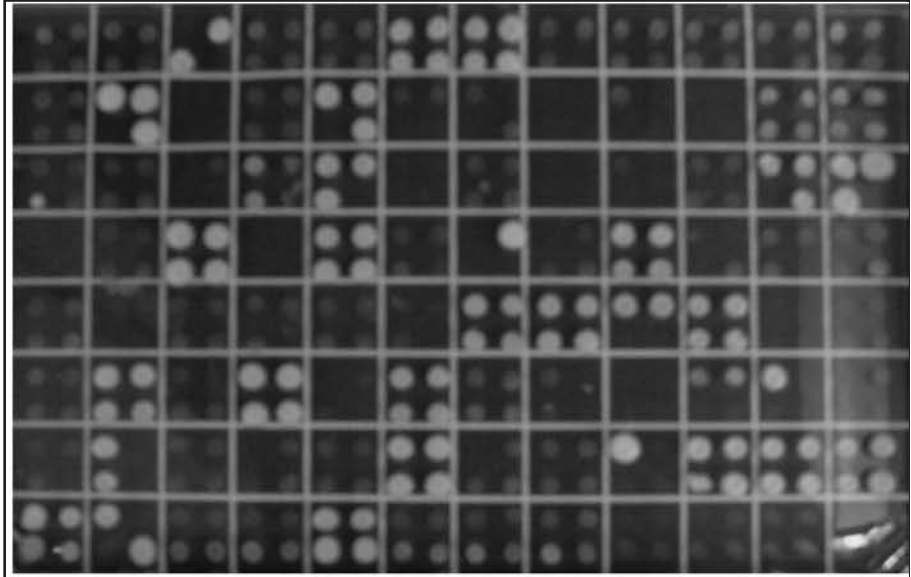

3 mM 3AT

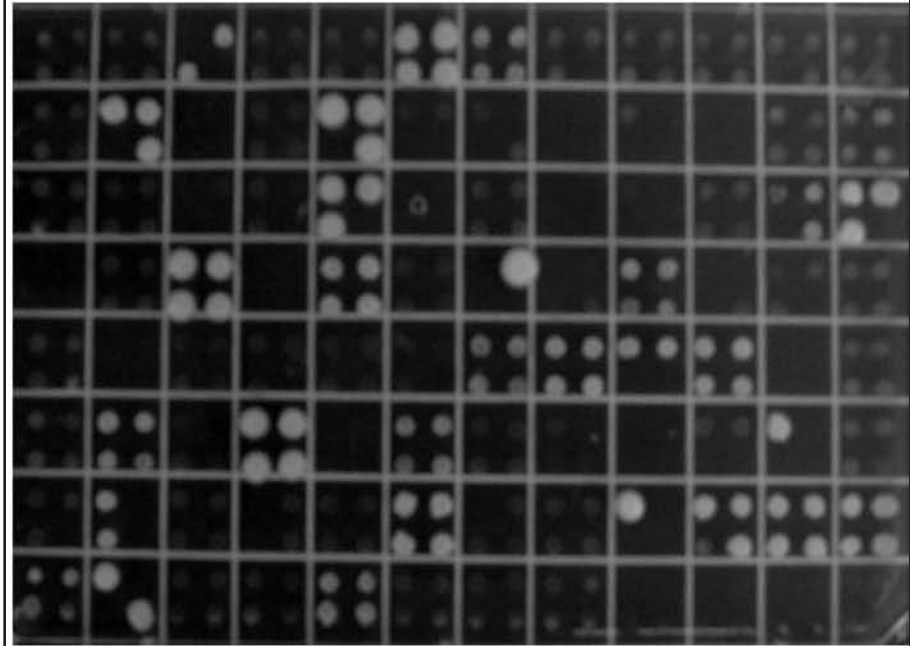

10 mM 3AT

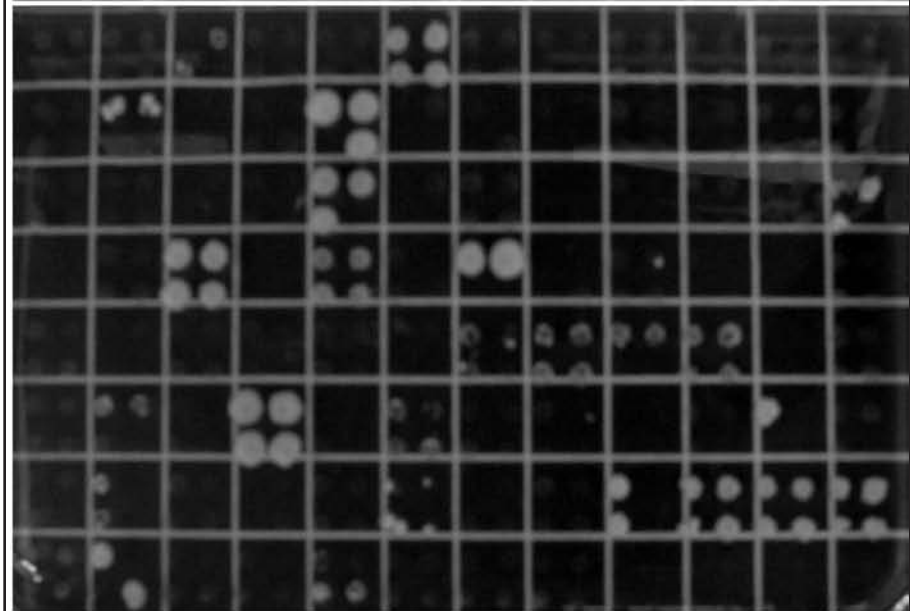

## Positive reference set - Autoactivation tests

Baits: pGADCg

Preys: pGBKCg

(empty vector)

0 mM 3AT

3 mM 3AT

10 mM 3AT

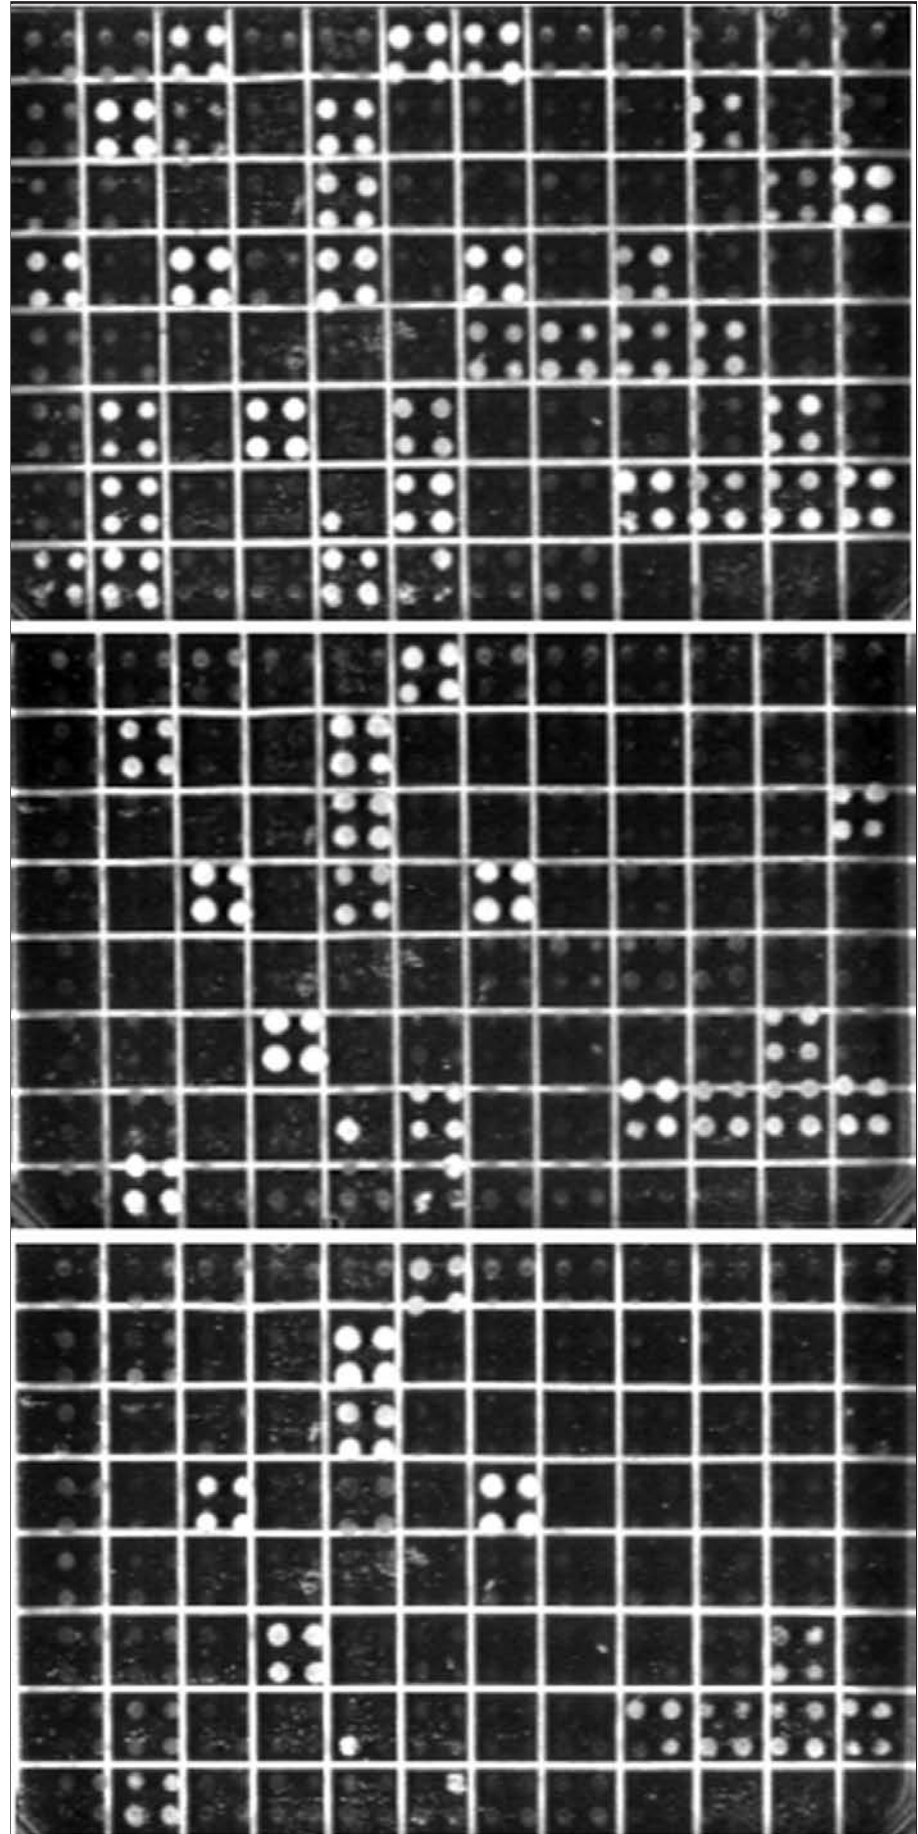



## Positive reference set - Autoactivation tests

Baits: pGBGT7g

Preys: pGADCg

(empty vector)

0 mM 3AT

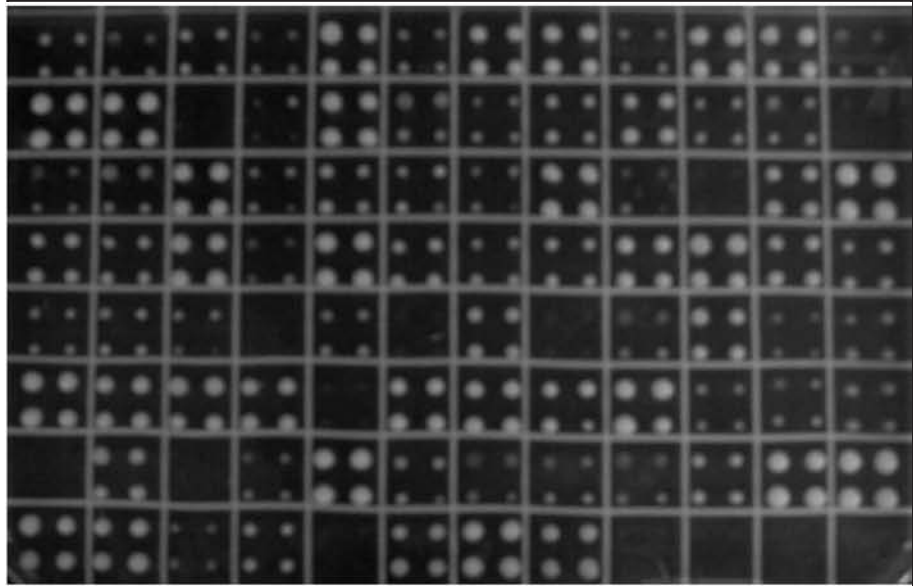

3 mM 3AT

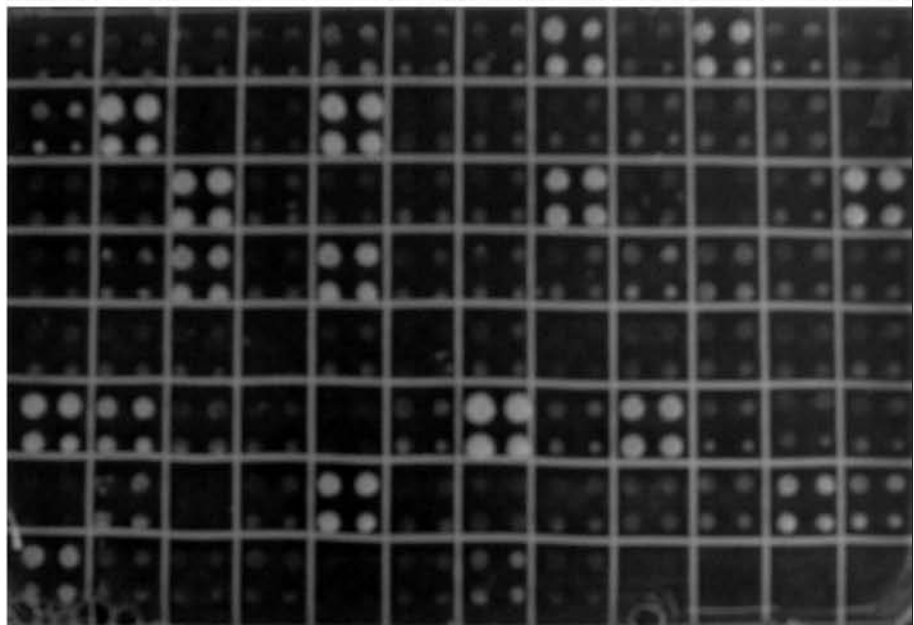

10 mM 3AT

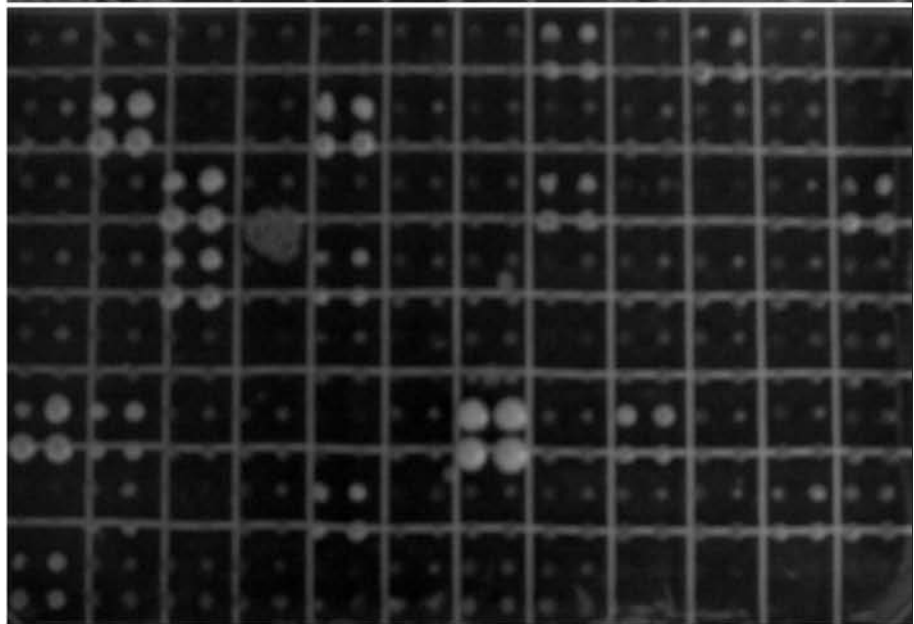

## Positive reference set - Autoactivation tests

Baits: pGBGT7g

Preys: pGADCg

(empty vector)

0 mM 3AT

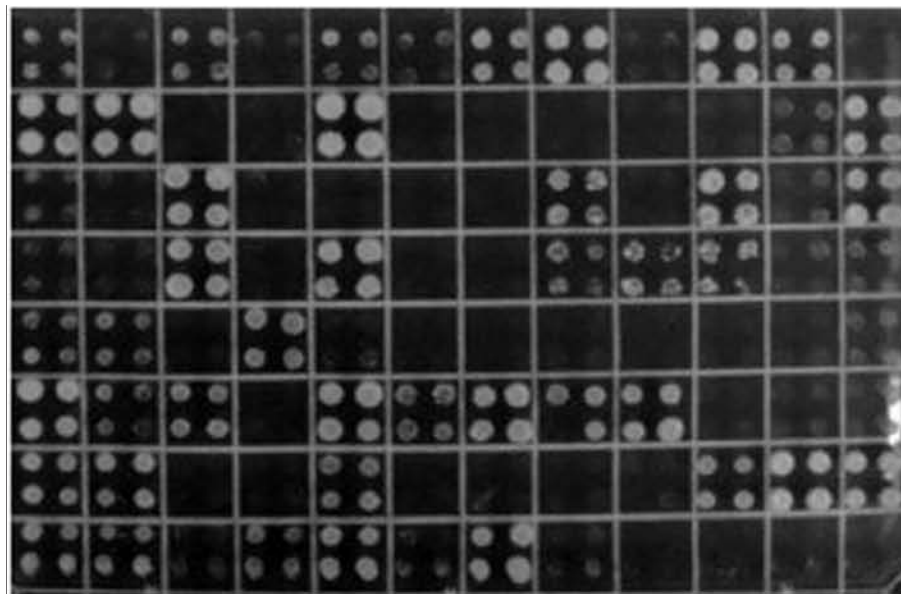

3 mM 3AT

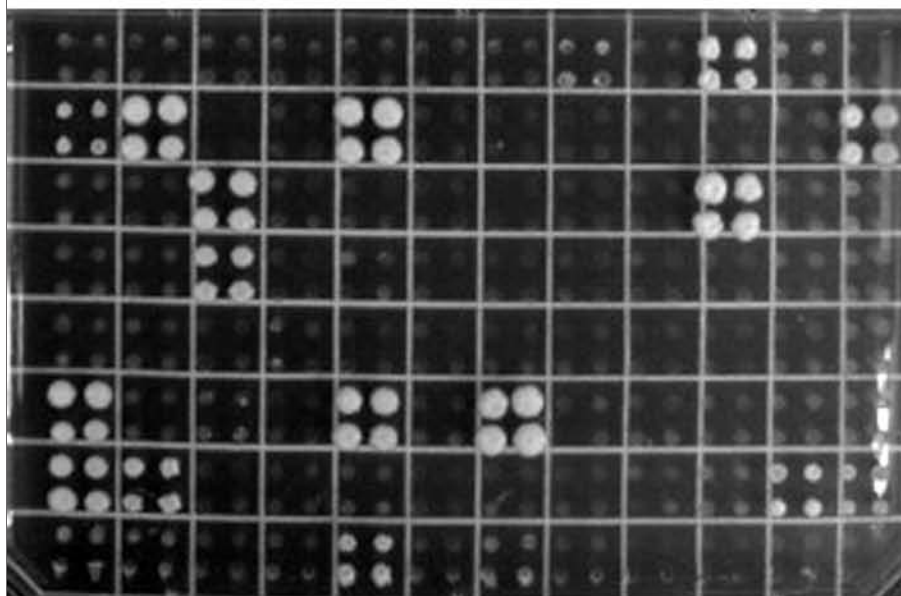

10 mM 3AT

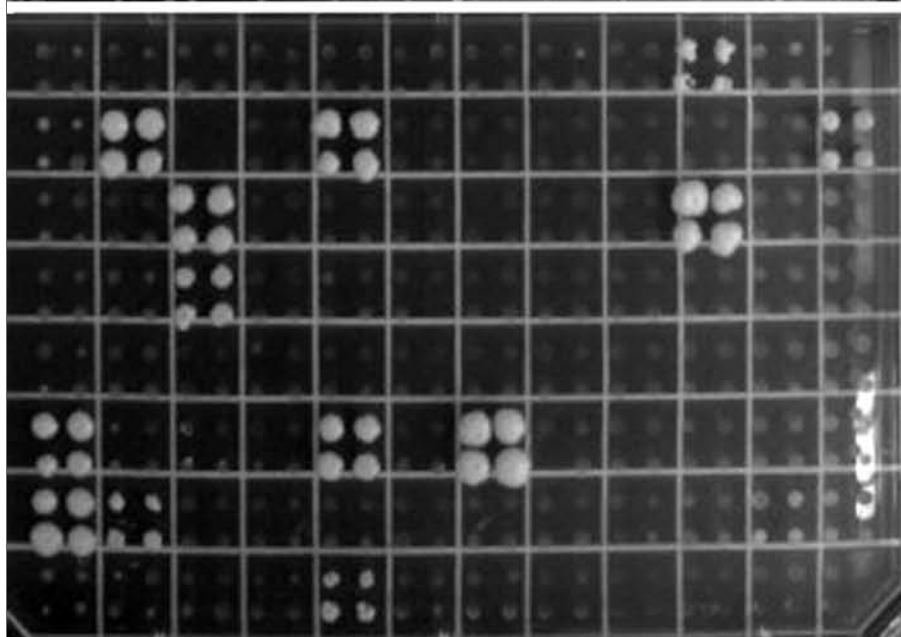

Positive reference set - Autoactivation tests

Baits: pGADCg

Preys: pGBGT7g  
(empty vector)

0 mM 3AT

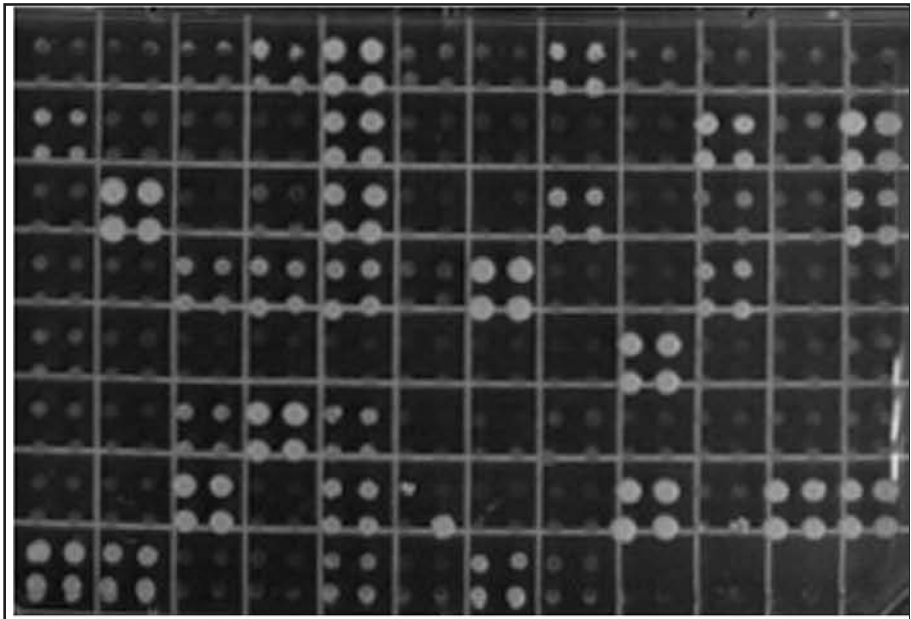

3 mM 3AT

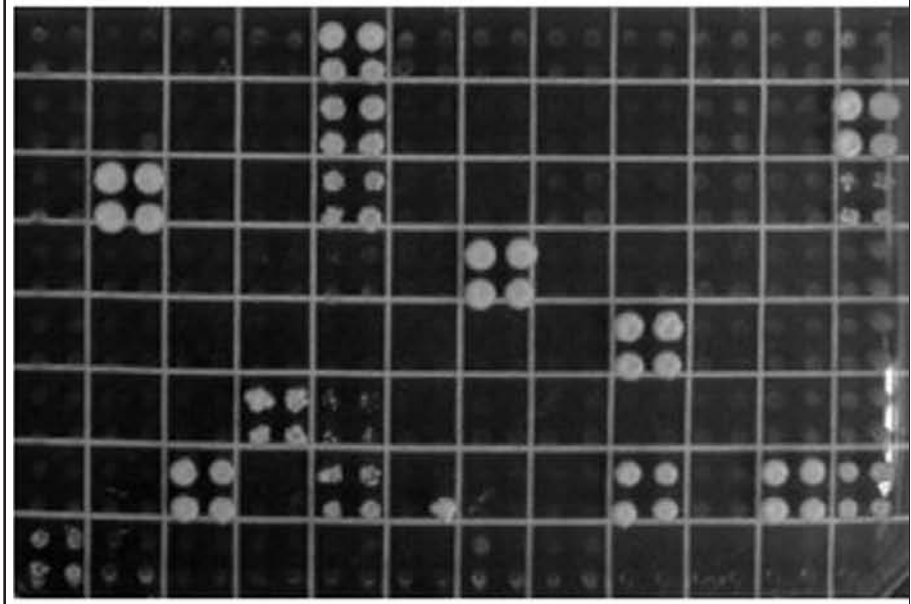

10 mM 3AT

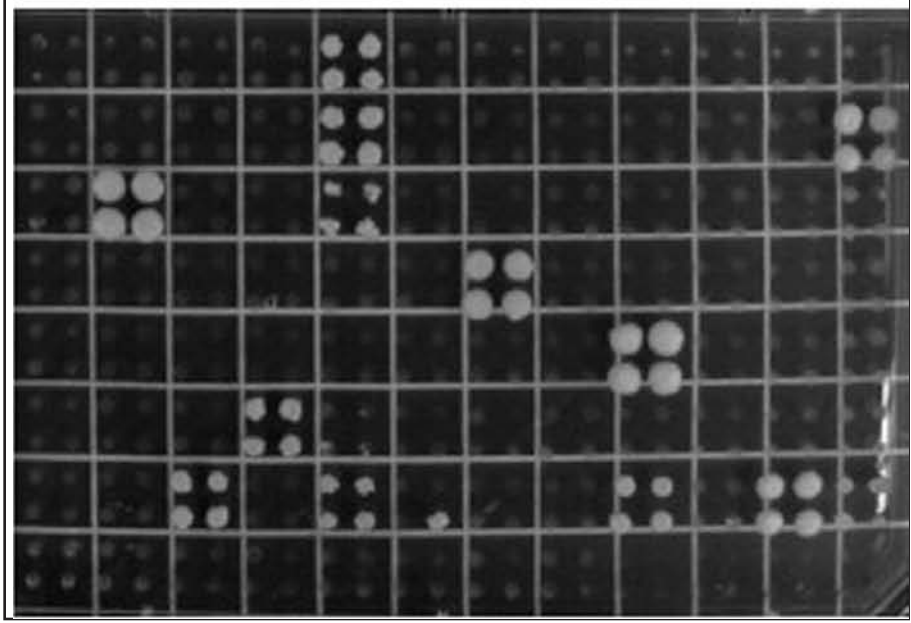

## Positive reference set - Autoactivation tests

Baits: pGADCg

Preys: pGBGT7g  
(empty vector)

0 mM 3AT

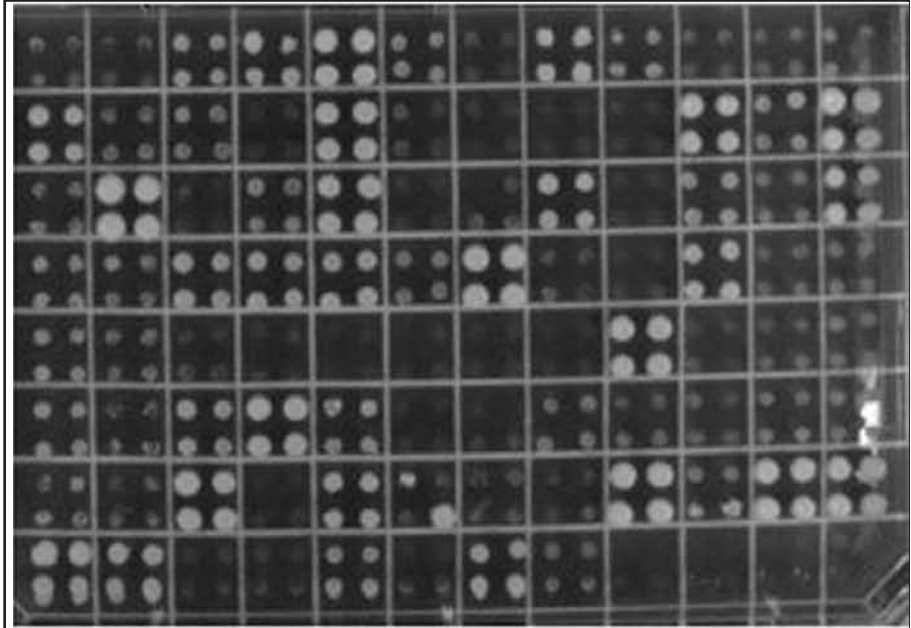

3 mM 3AT

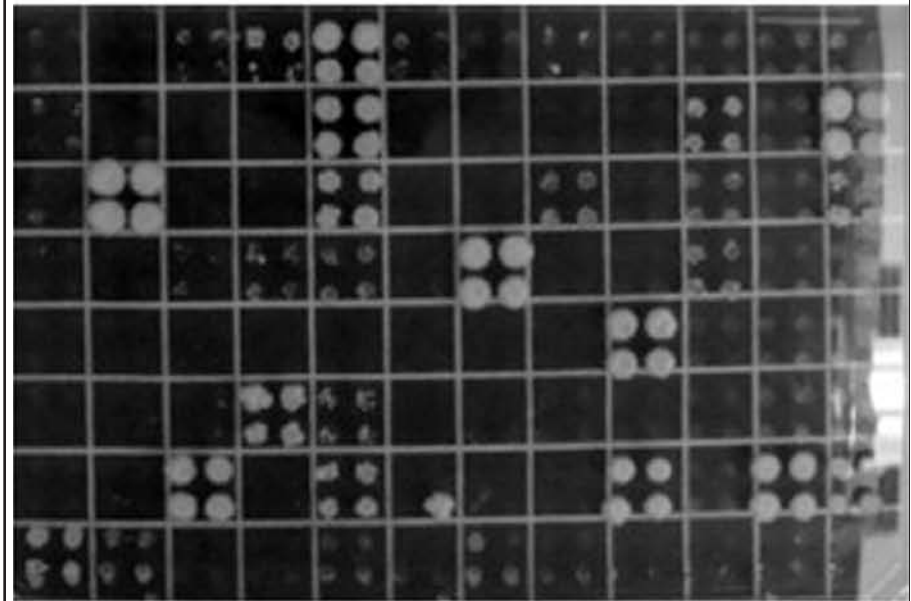

10 mM 3AT

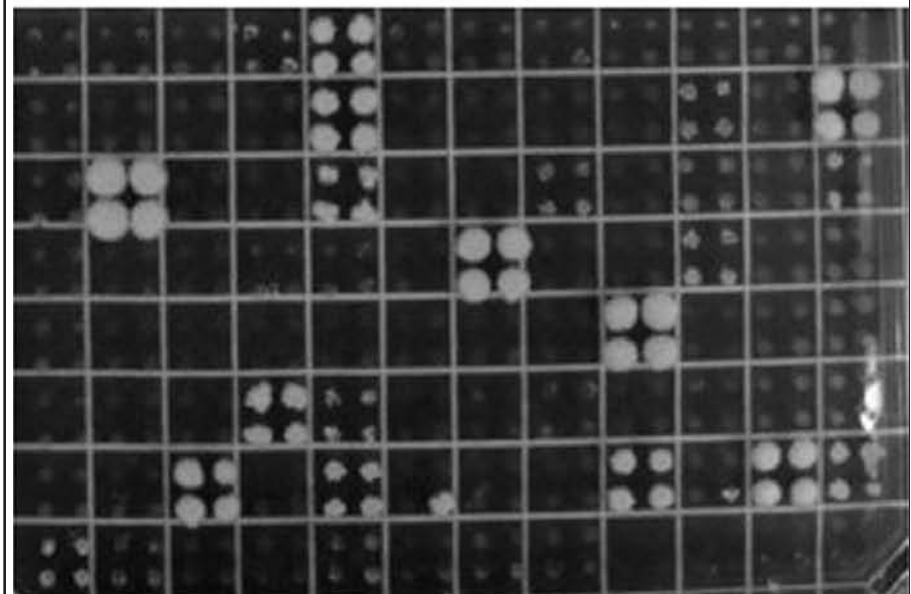

## Positive reference set - Autoactivation tests

Baits: pGBKcG

Preys: pGADT7g  
(empty vector)

0 mM 3AT

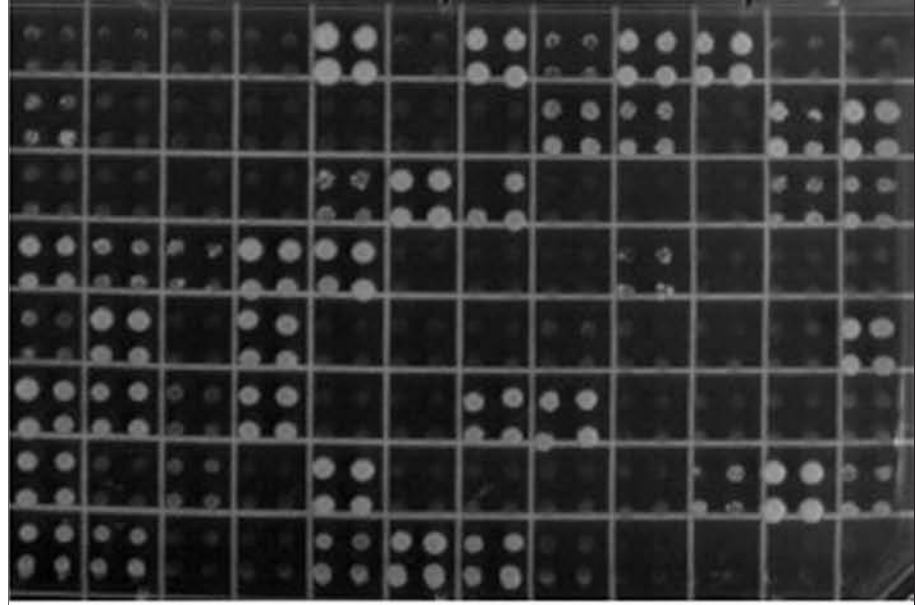

3 mM 3AT

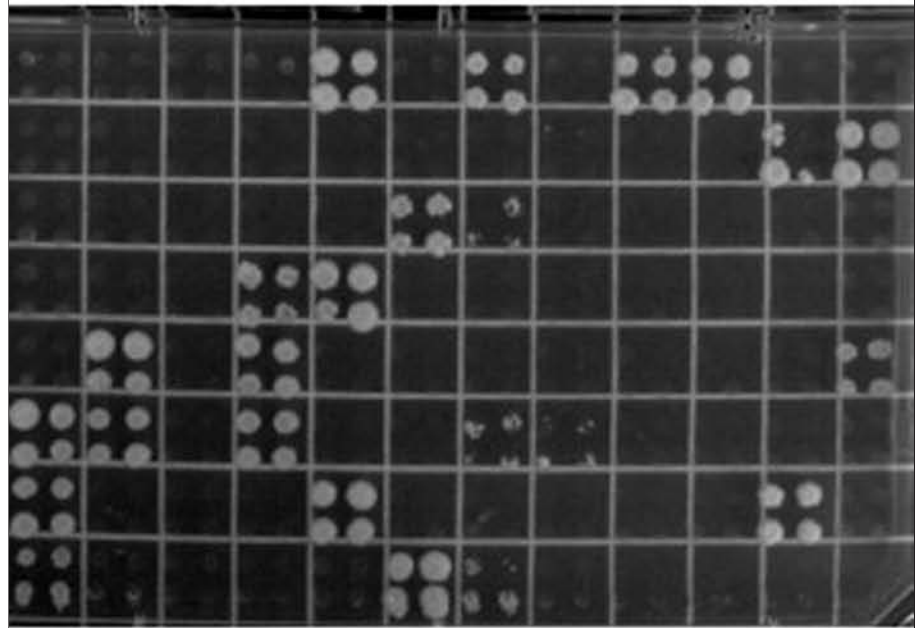

10 mM 3AT

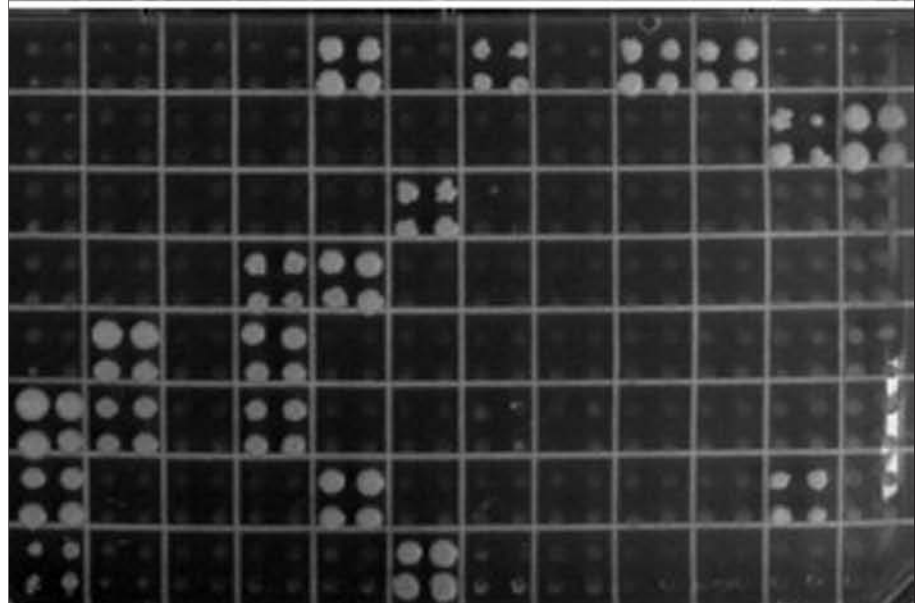

## Positive reference set - Autoactivation tests

Baits: pGBKcG

Preys: pGADT7g

(empty vector)

0 mM 3AT

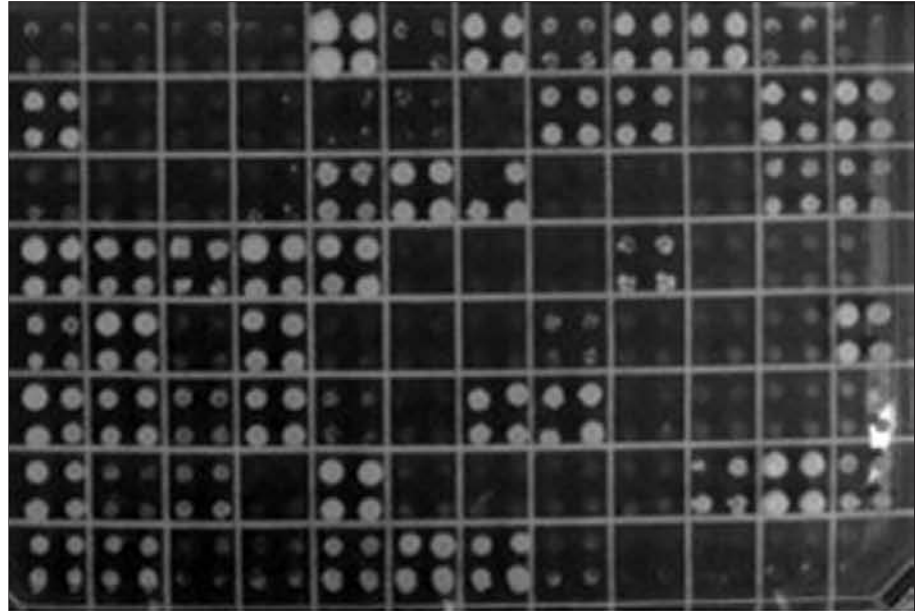

3 mM 3AT

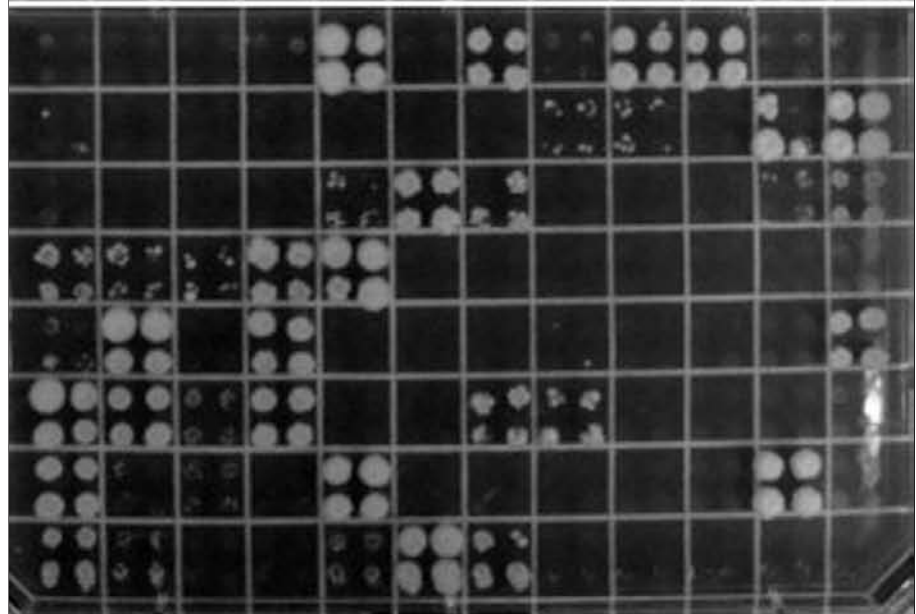

10 mM 3AT

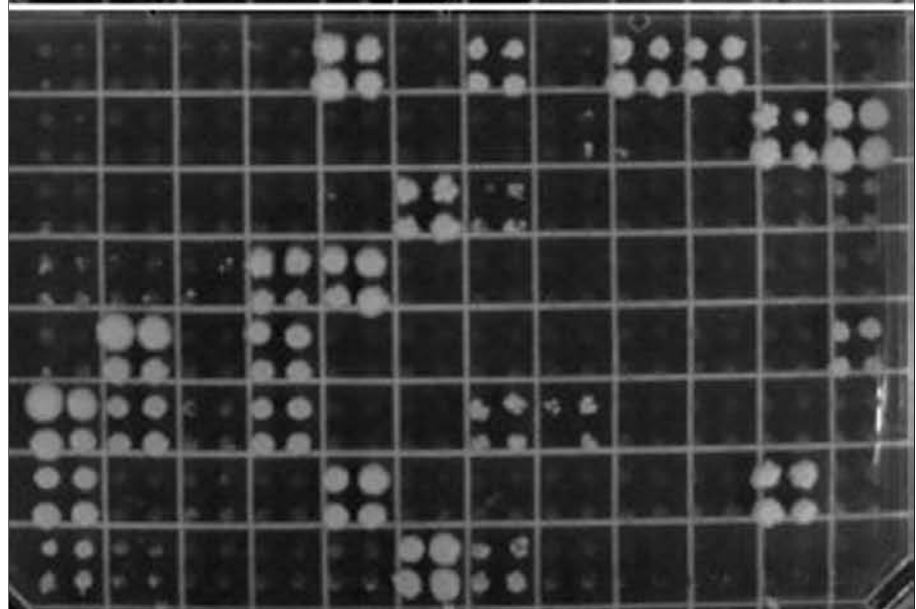

Positive reference set - Autoactivation tests

Baits: pGADT7g

Preys: pGBKCg  
(empty vector)

0 mM 3AT

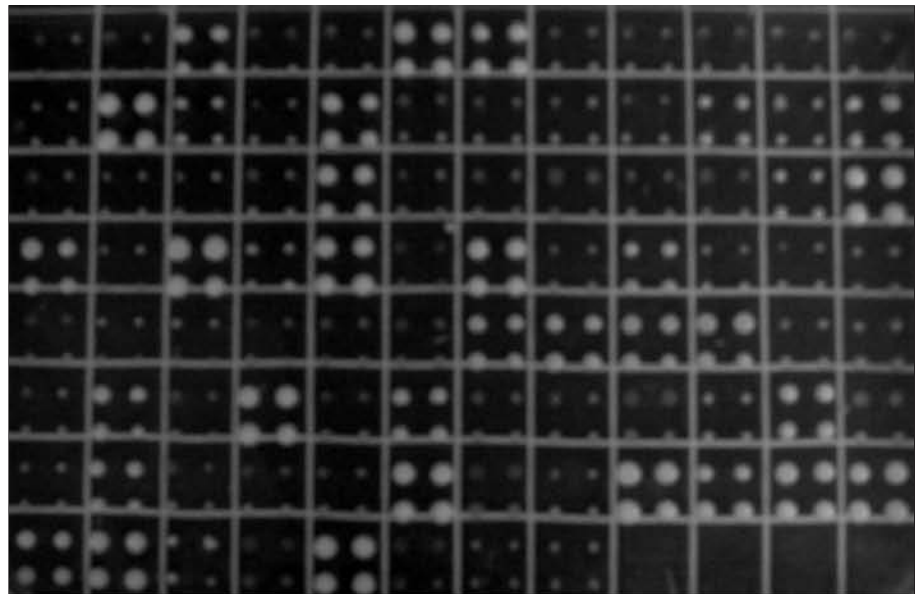

3 mM 3AT

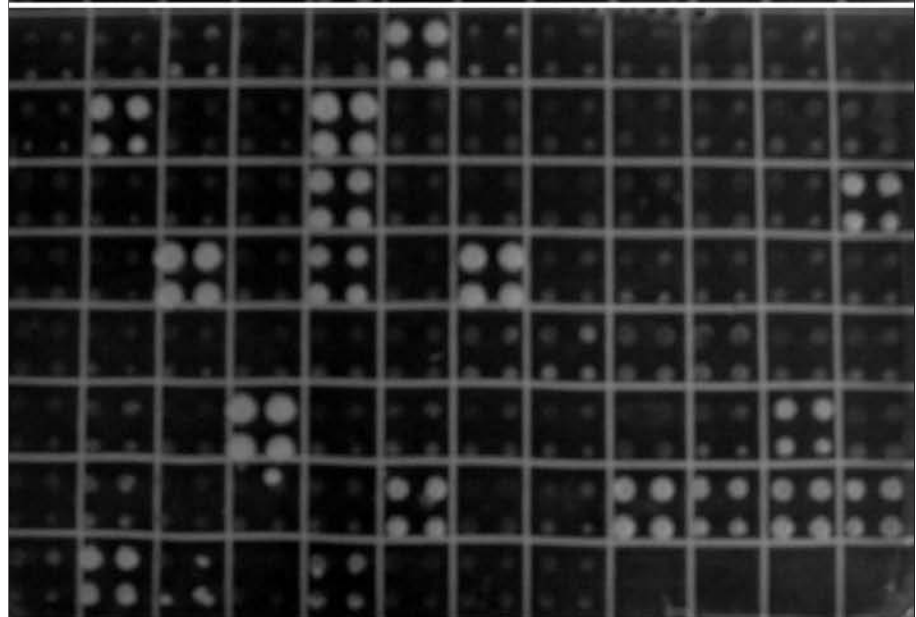

10 mM 3AT

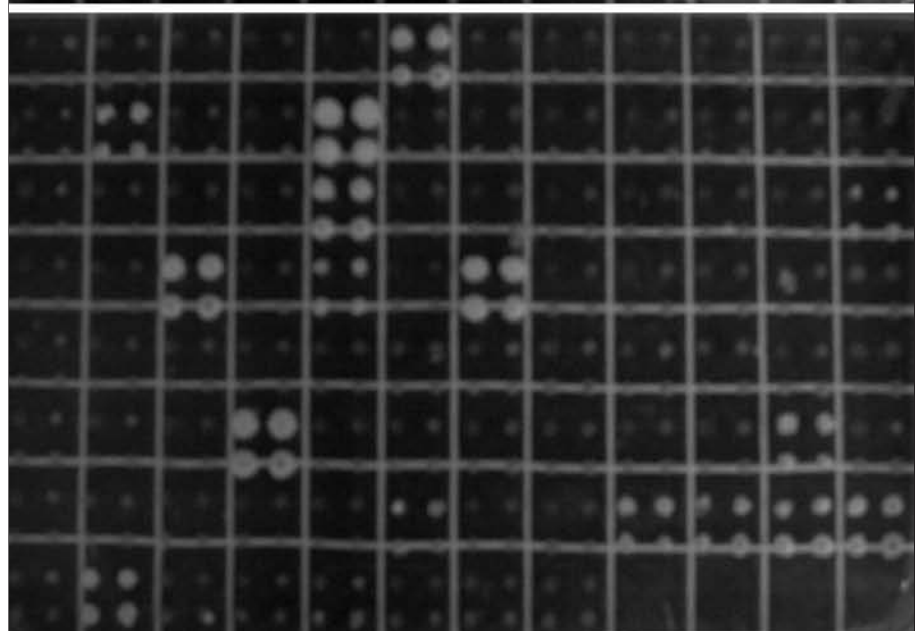

## Positive reference set - Autoactivation tests

Baits: pGADT7g

Preys: pGBKCg

(empty vector)

0 mM 3AT

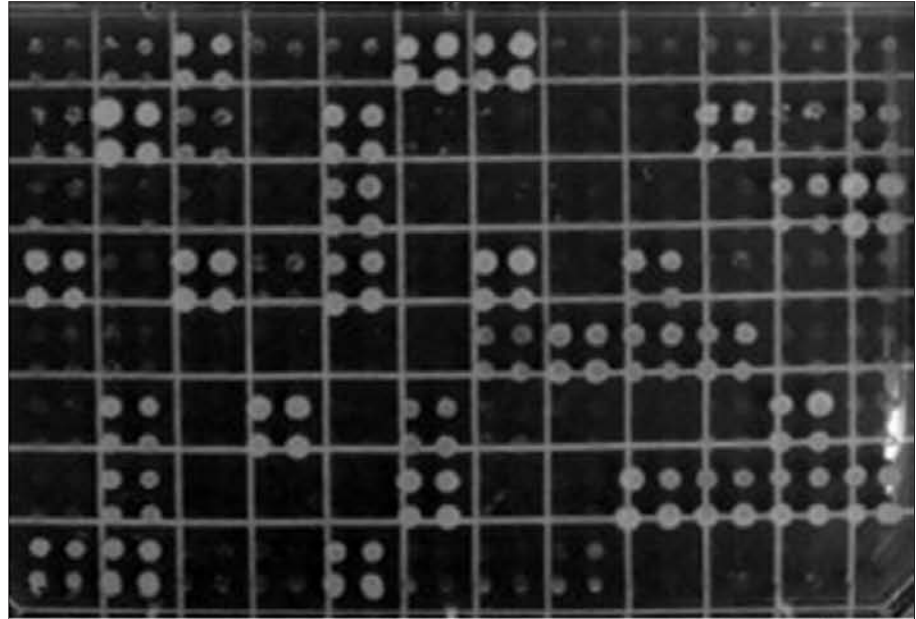

3 mM 3AT

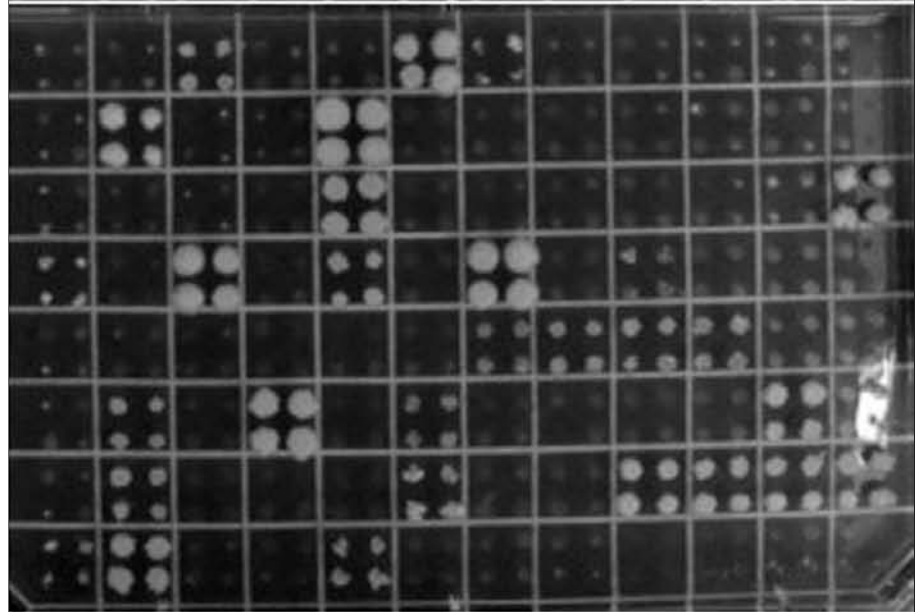

10 mM 3AT

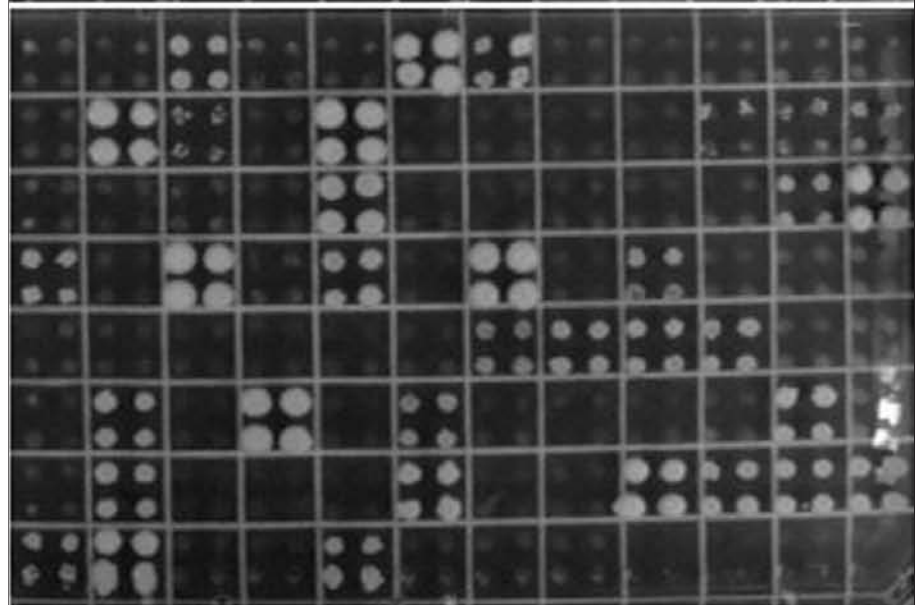



## Random reference set - Autoactivation tests

Baits: pDEST32

Preys: pDEST22

(empty vector)

0 mM 3AT

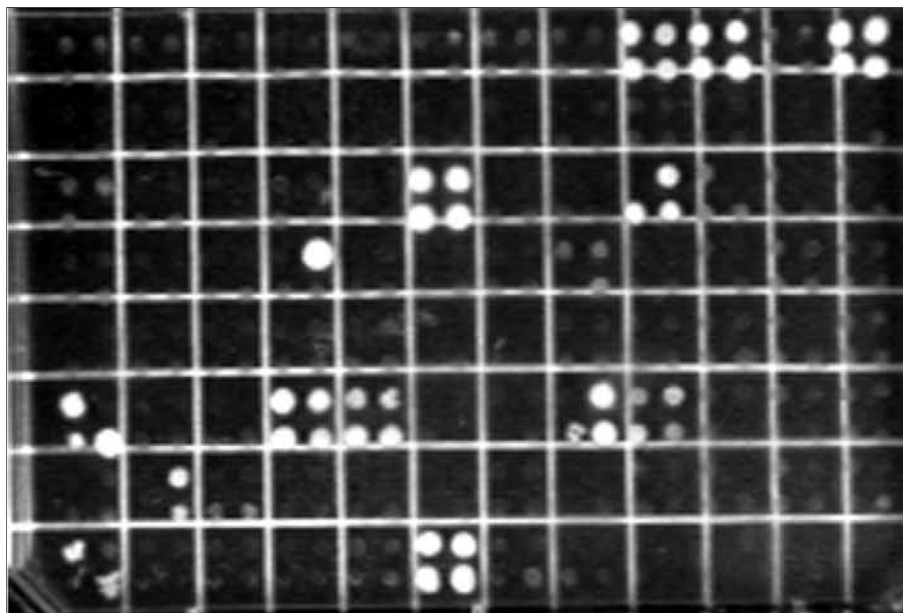

3 mM 3AT

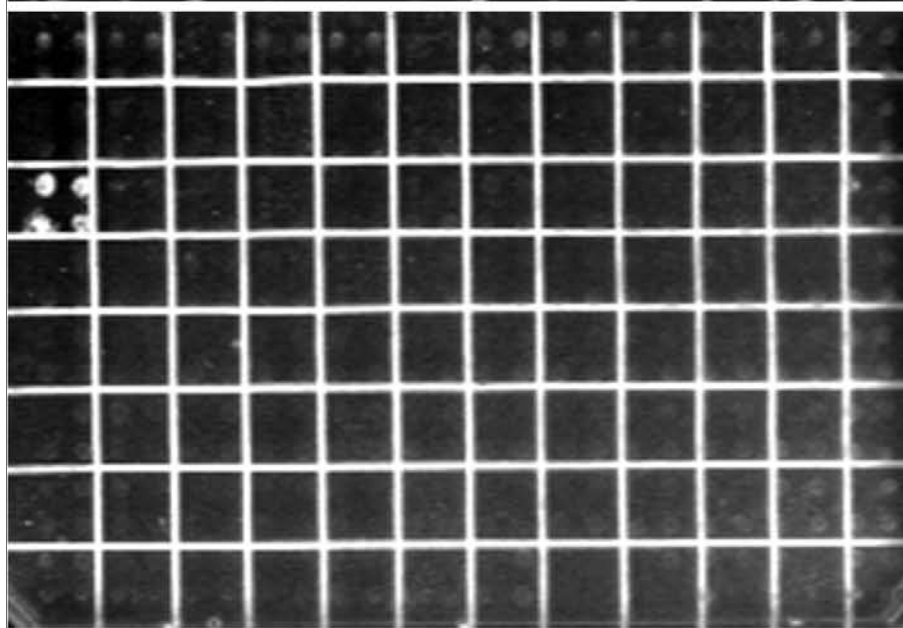

10 mM 3AT

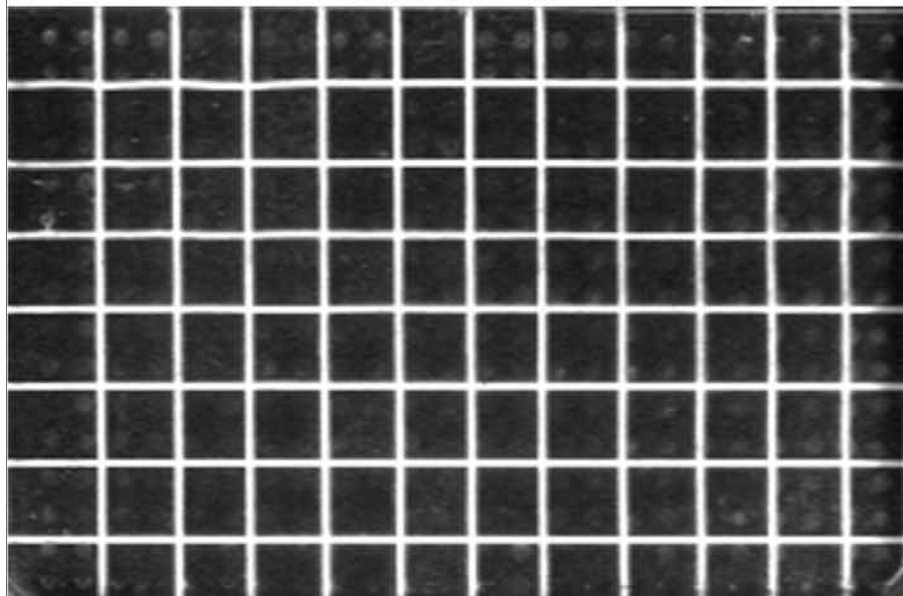

## Random reference set - Autoactivation tests

Baits: pDEST32

Preys: pDEST22

(empty vector)

0 mM 3AT

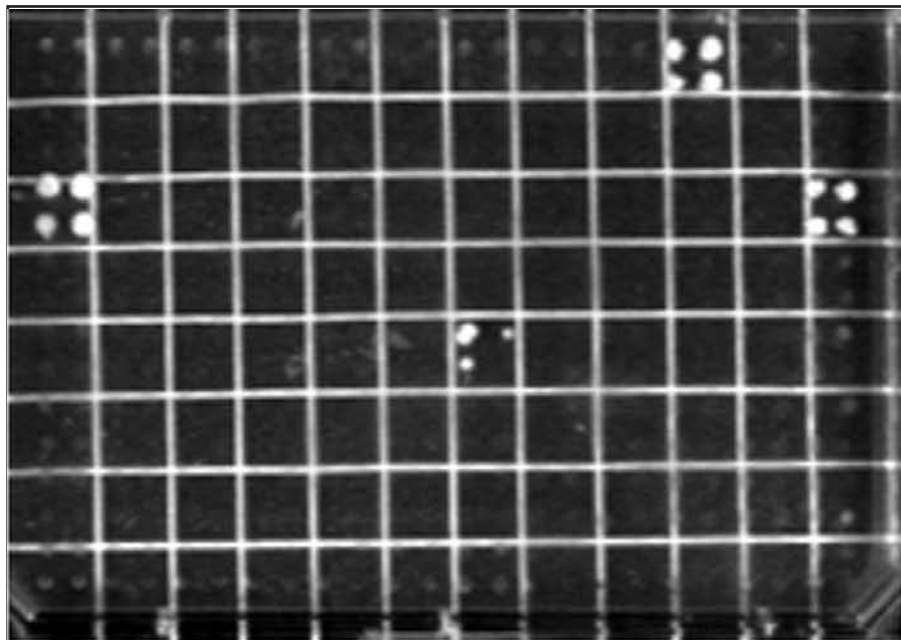

3 mM 3AT

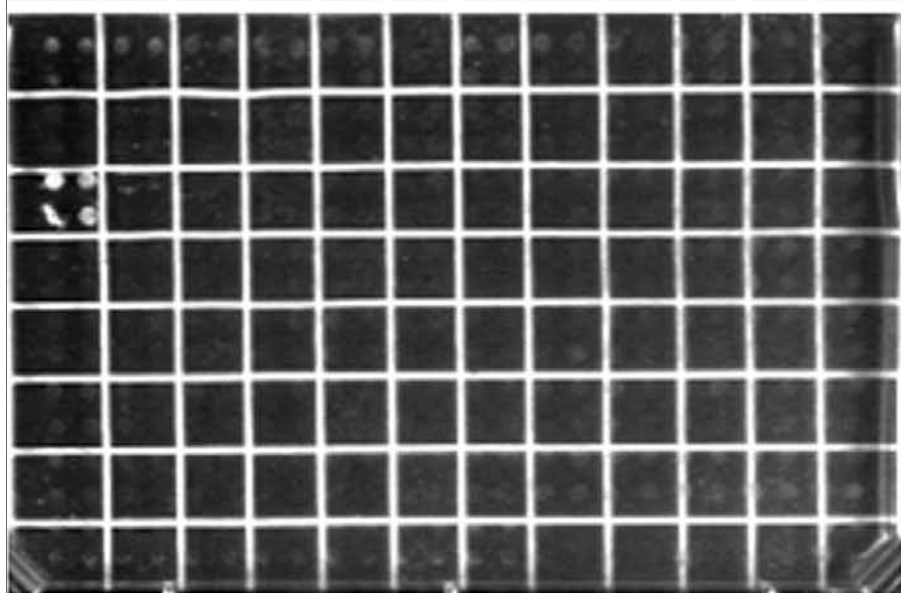

10 mM 3AT

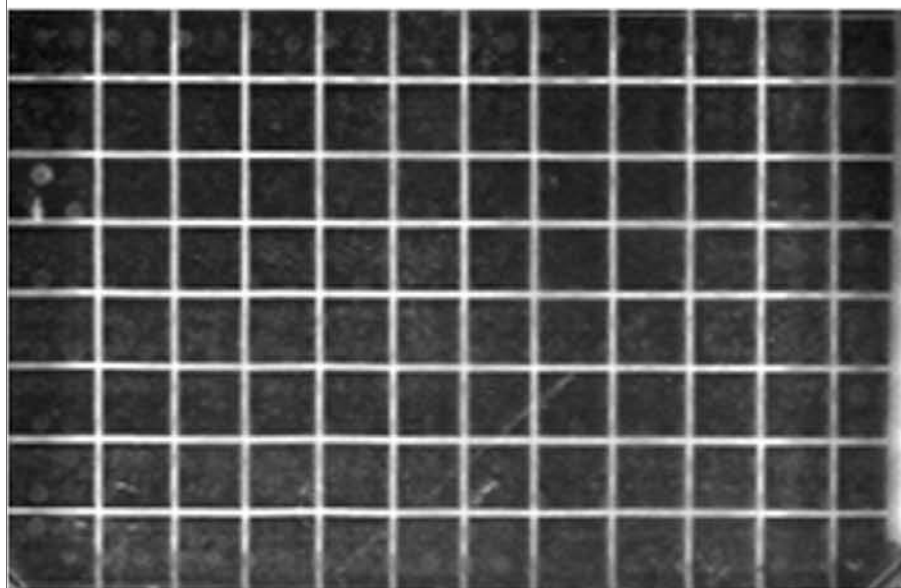

## Random reference set - Autoactivation tests

Baits: pDEST22

Preys: pDEST32

(empty vector)

0 mM 3AT

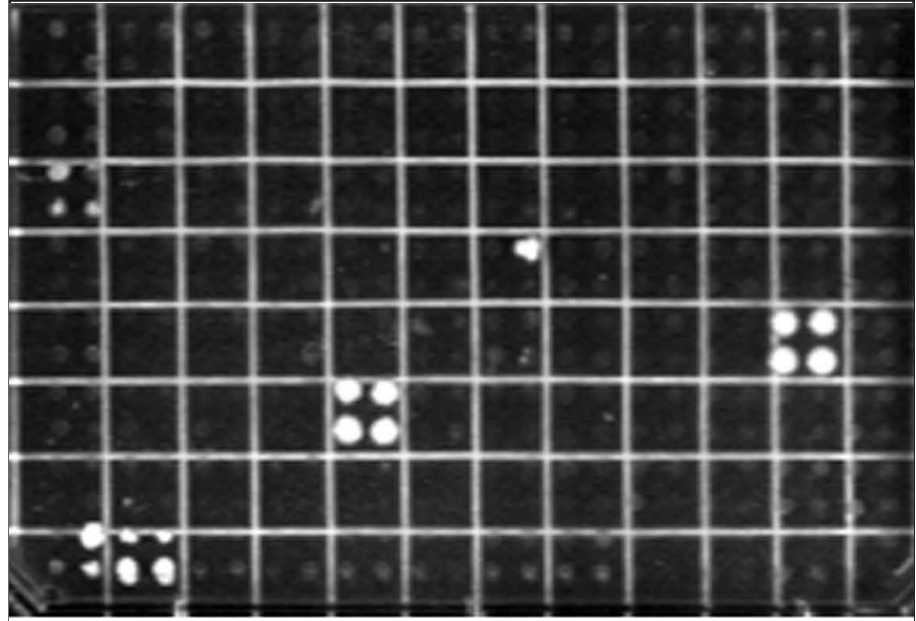

3 mM 3AT

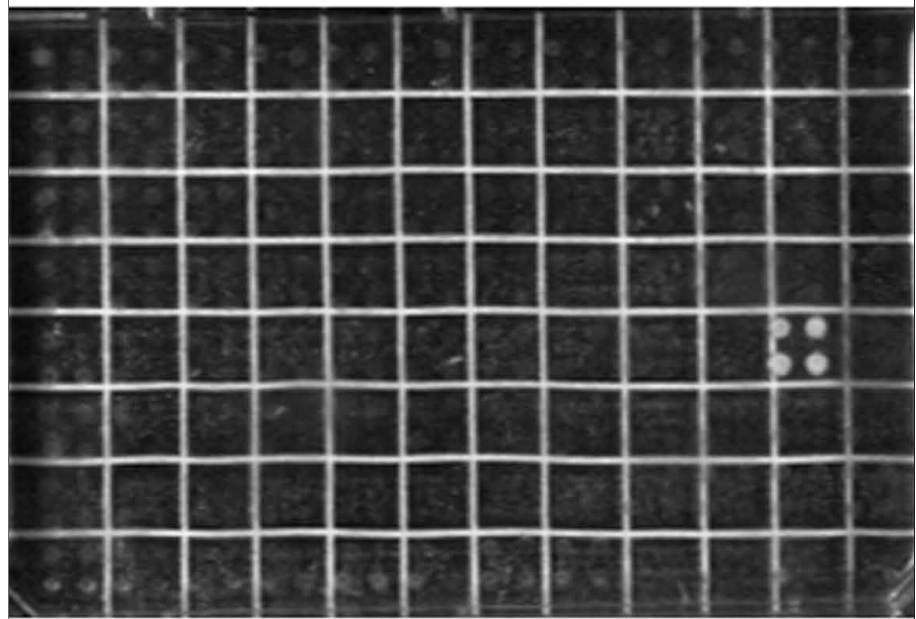

10 mM 3AT

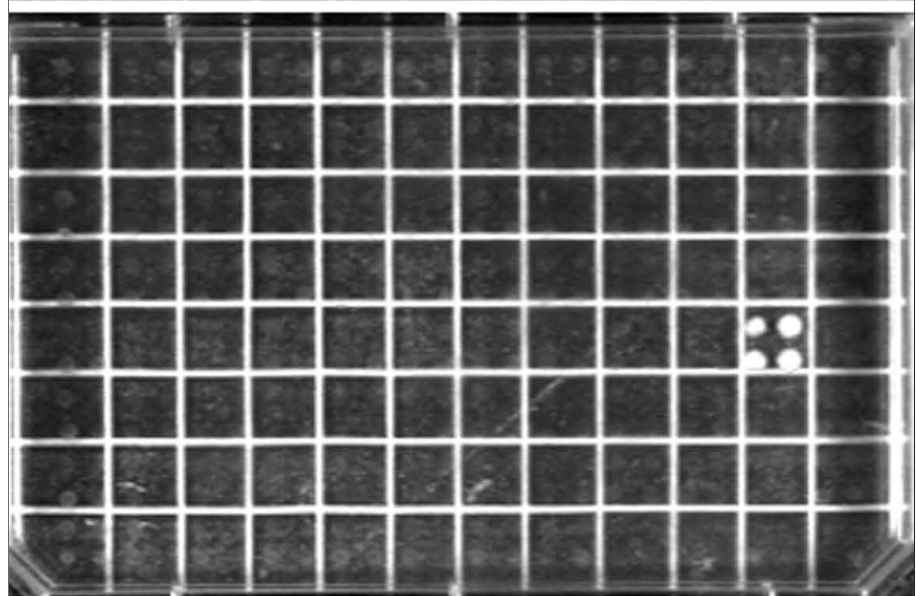

## Random reference set - Autoactivation tests

Baits: pDEST22

Preys: pDEST32

(empty vector)

0 mM 3AT

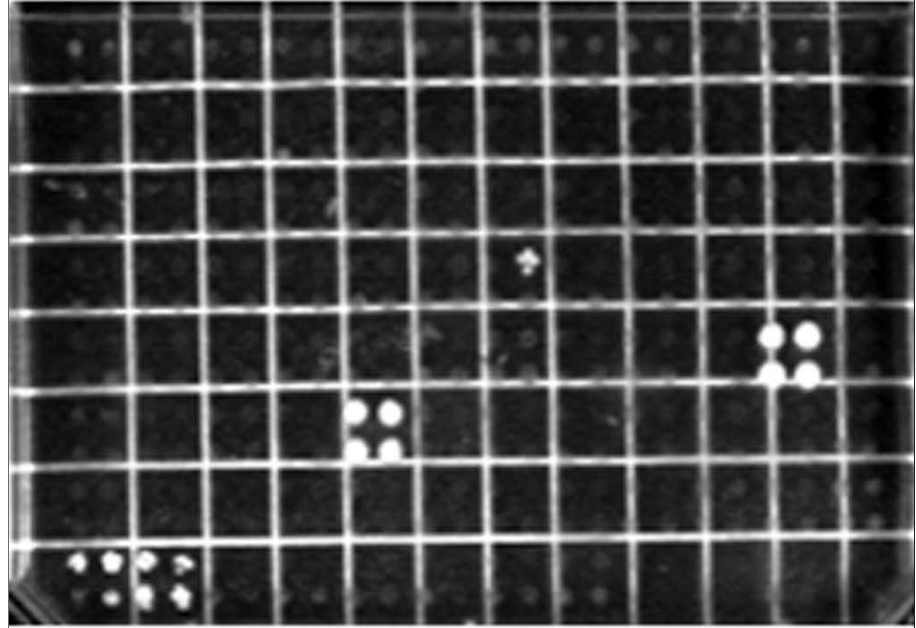

3 mM 3AT

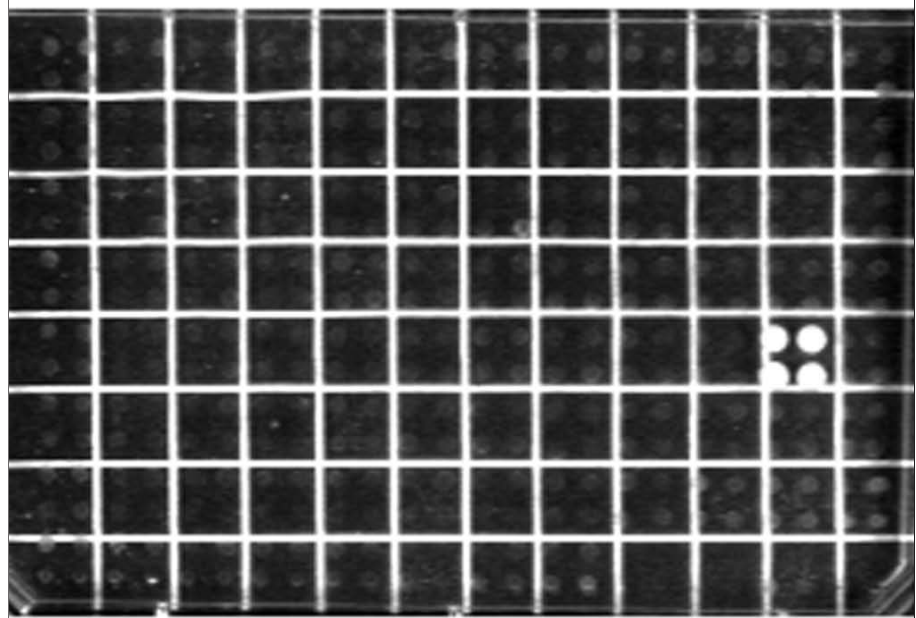

10 mM 3AT

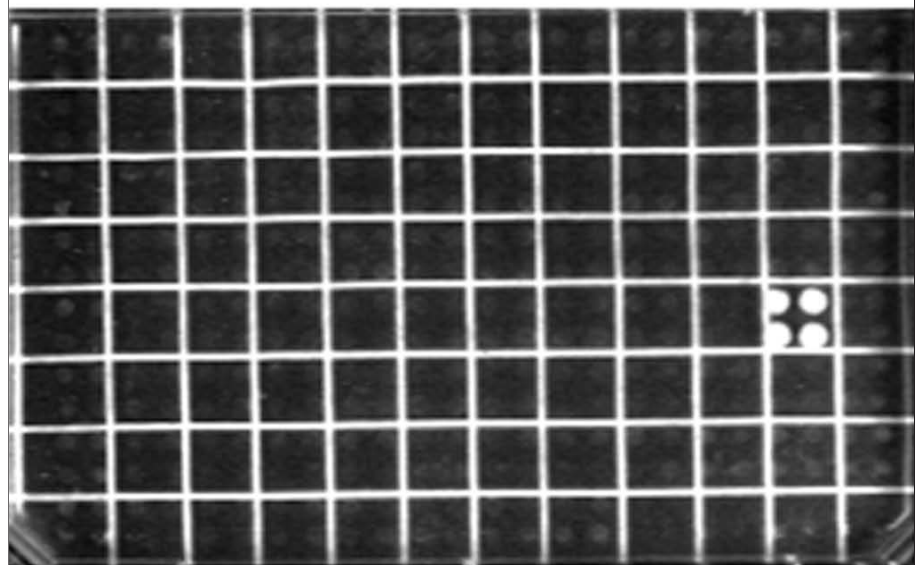

## Random reference set - Autoactivation tests

Baits: pGBGT7g

Preys: pGADT7g

(empty vector)

0 mM 3AT

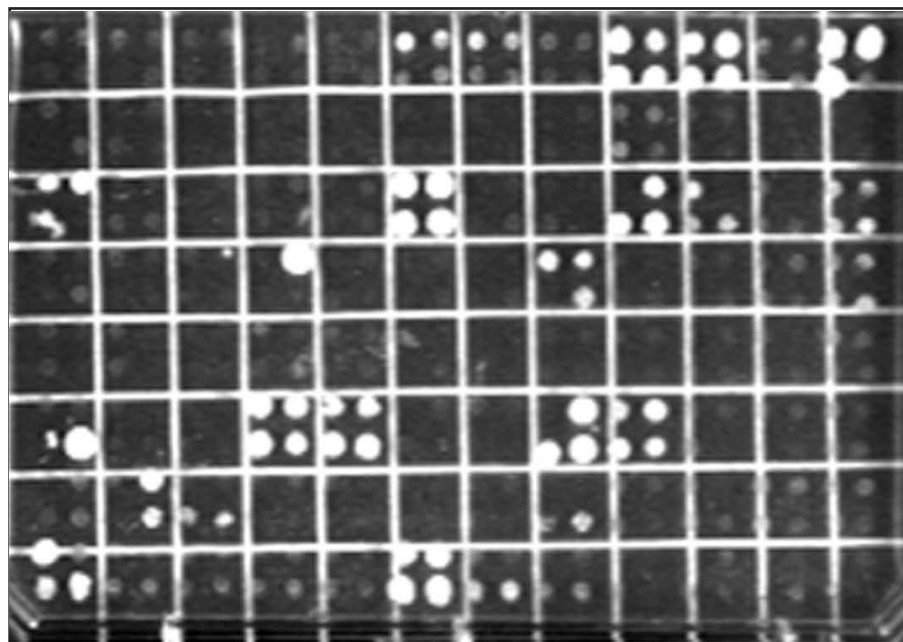

3 mM 3AT

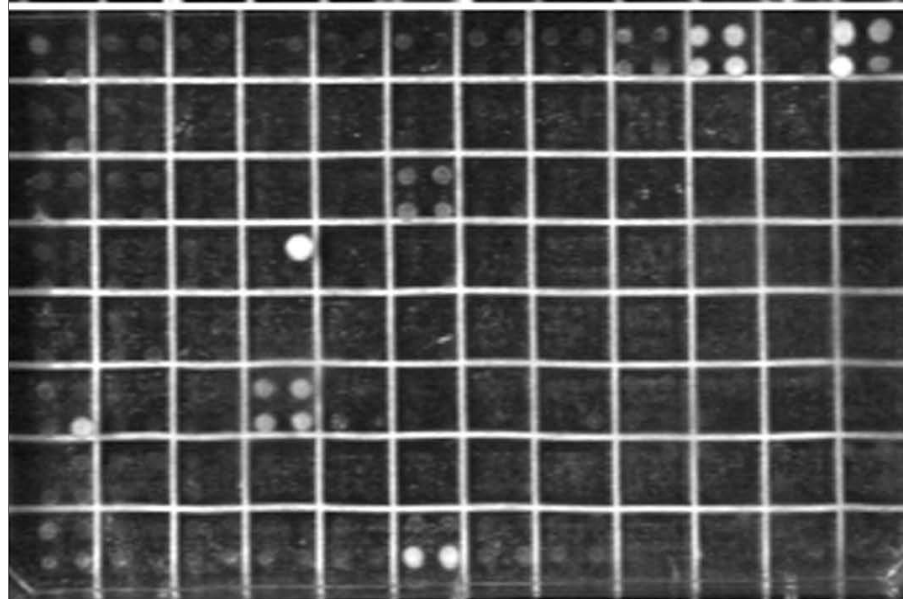

10 mM 3AT

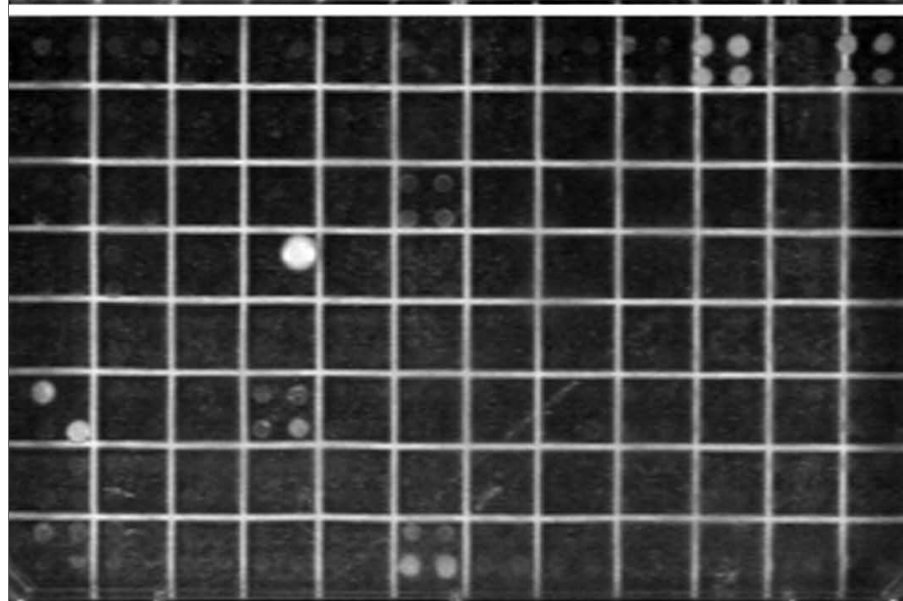

## Random reference set - Autoactivation tests

Baits: pGBGT7g

Preys: pGADT7g  
(empty vector)

0 mM 3AT

3 mM 3AT

10 mM 3AT

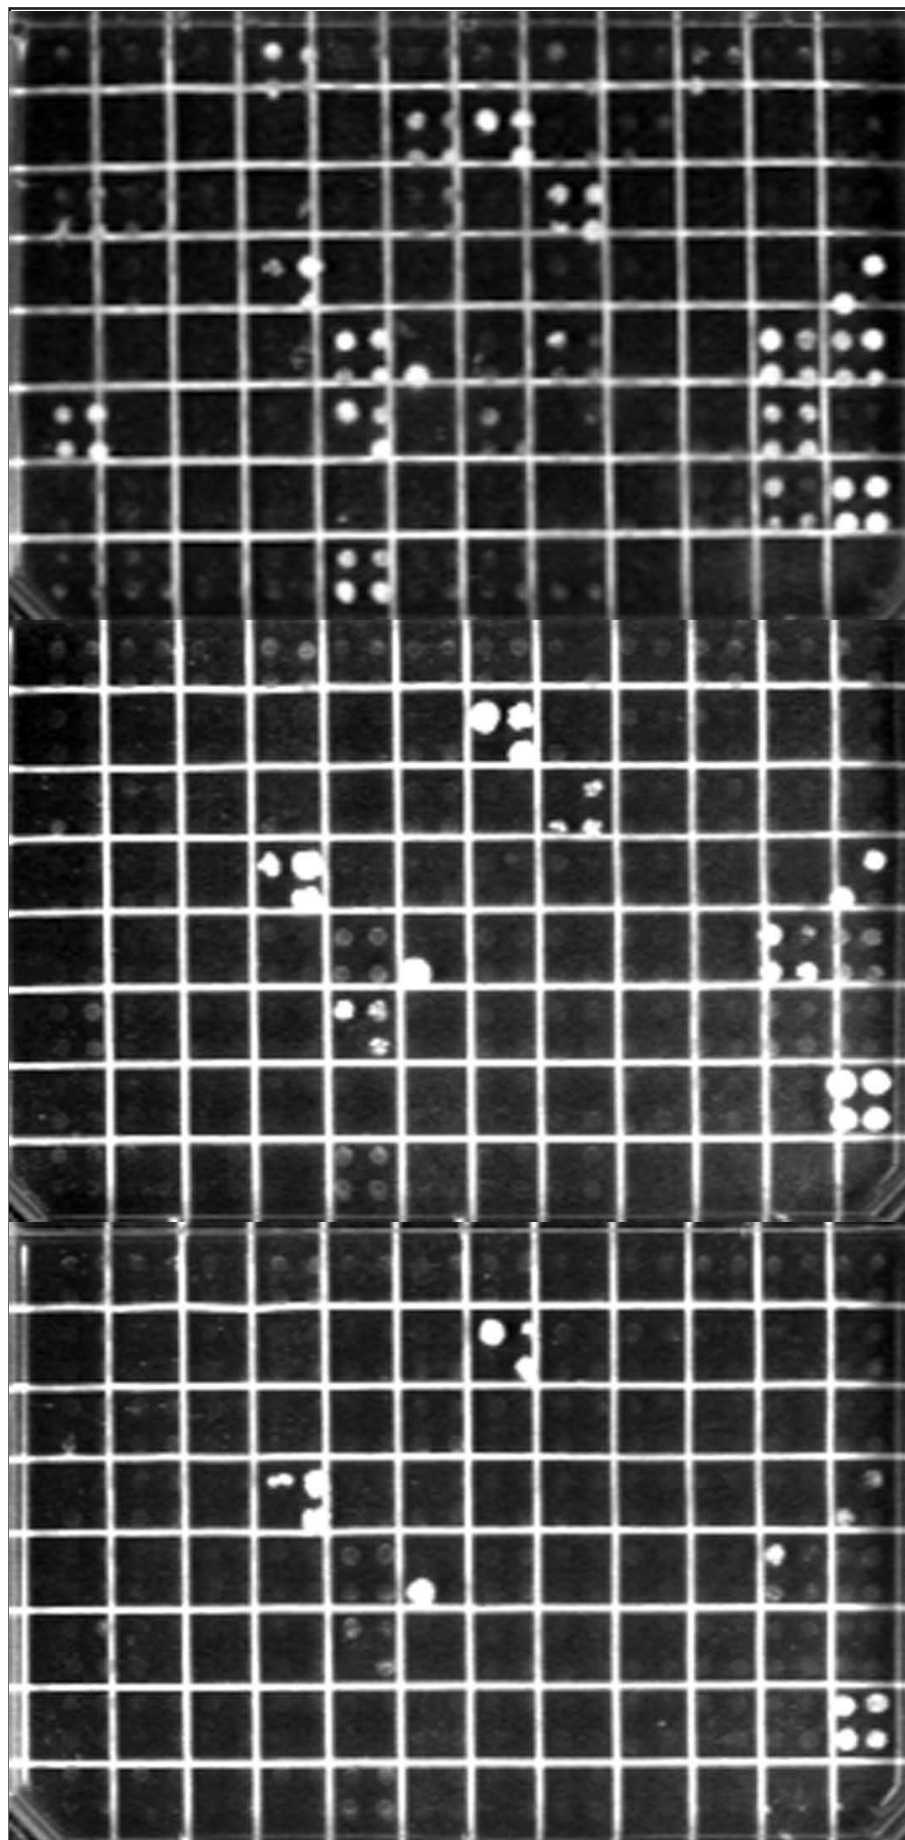

Random reference set - Autoactivation tests

Baits: pGADT7g

Preys: pGBGT7g  
(empty vector)

0 mM 3AT

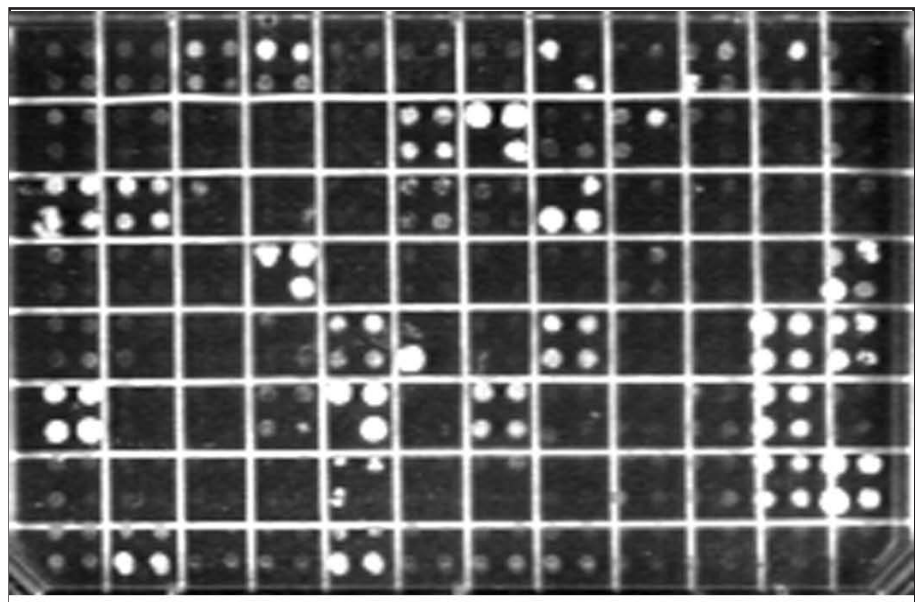

3 mM 3AT

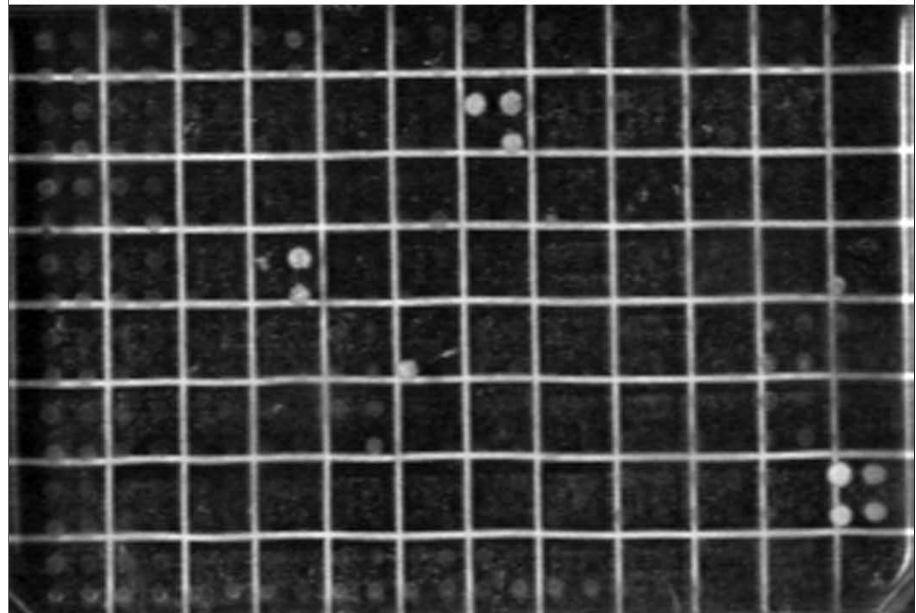

10 mM 3AT

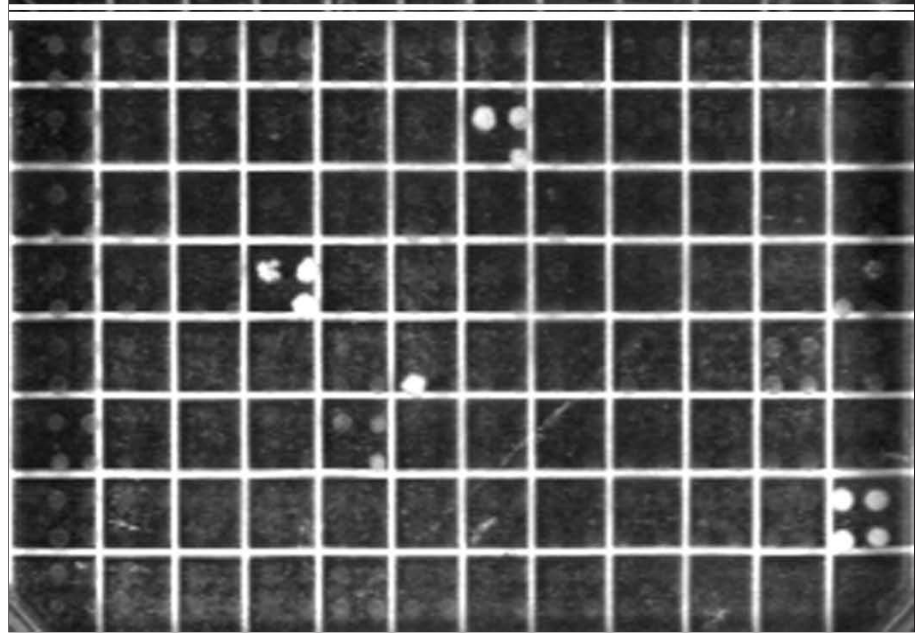

## Random reference set - Autoactivation tests

Baits: pGADT7g

Preys: pGBGT7g  
(empty vector)

0 mM 3AT

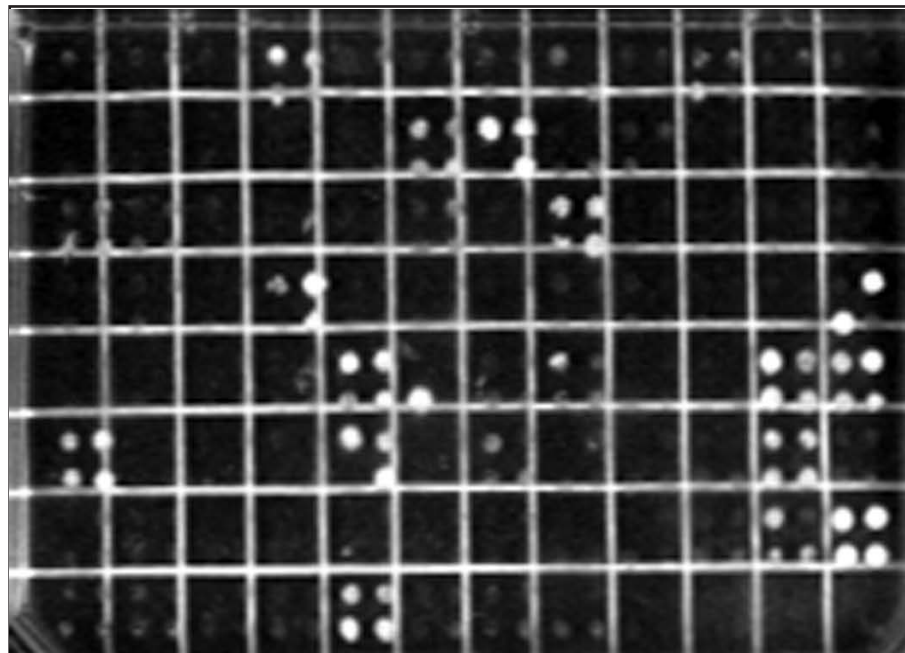

3 mM 3AT

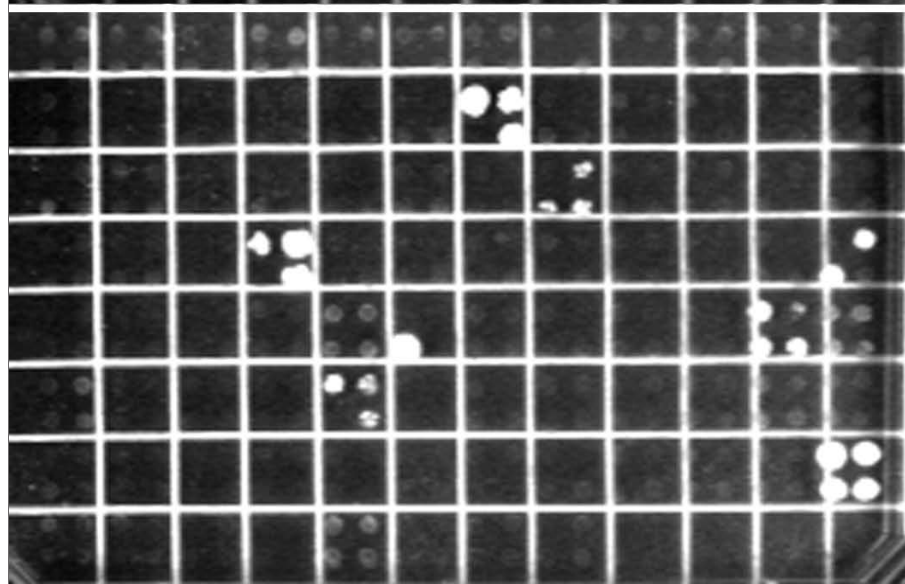

10 mM 3AT

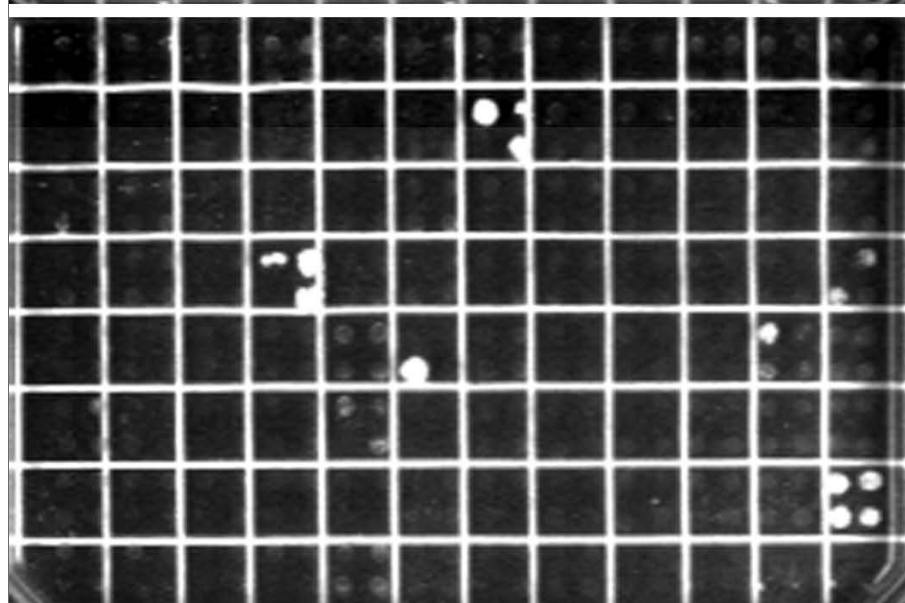



Random reference set - Autoactivation tests

Baits: pGBKcG

Preys: pGADCg

(empty vector)

0 mM 3AT

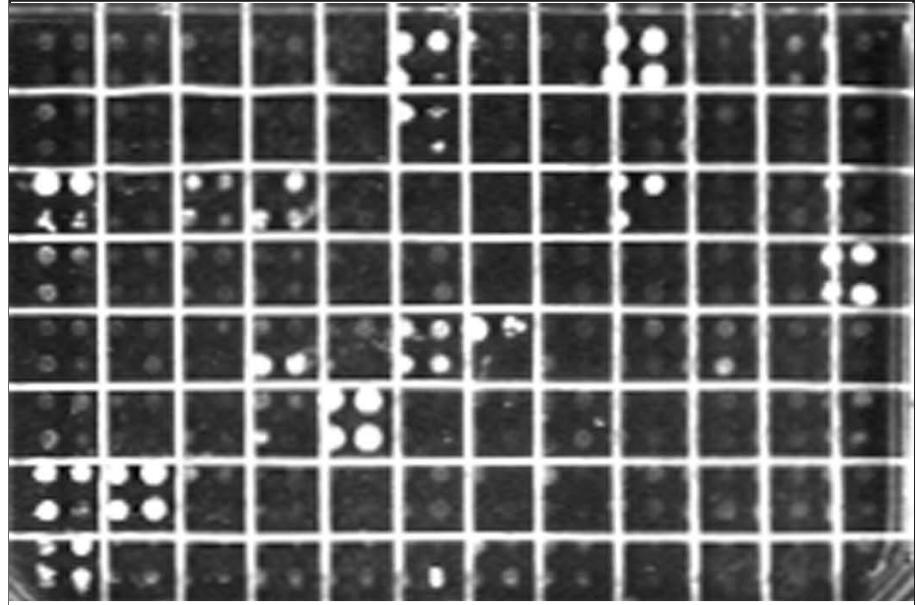

3 mM 3AT

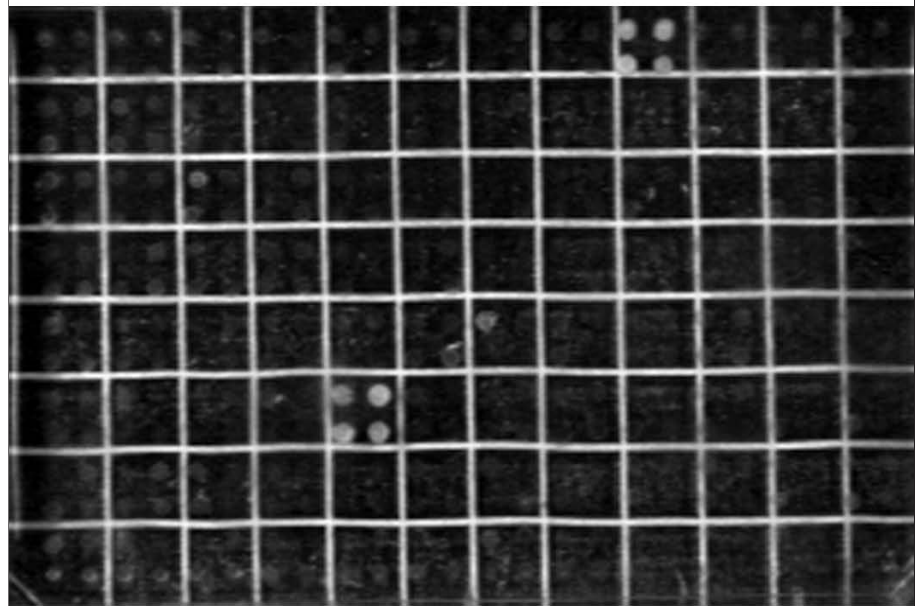

10 mM 3AT

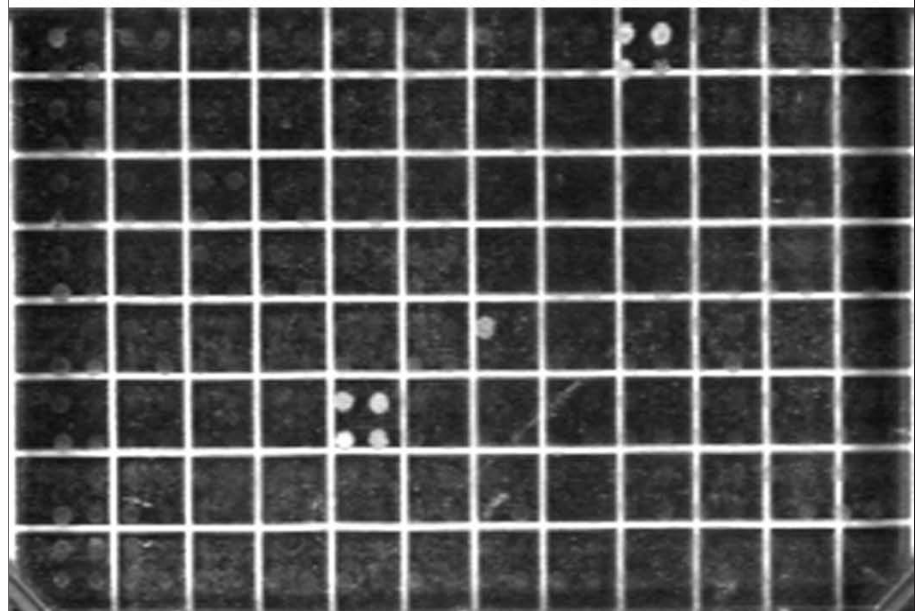

## Random reference set - Autoactivation tests

Baits: pGBKcG

Preys: pGADCg

(empty vector)

0 mM 3AT

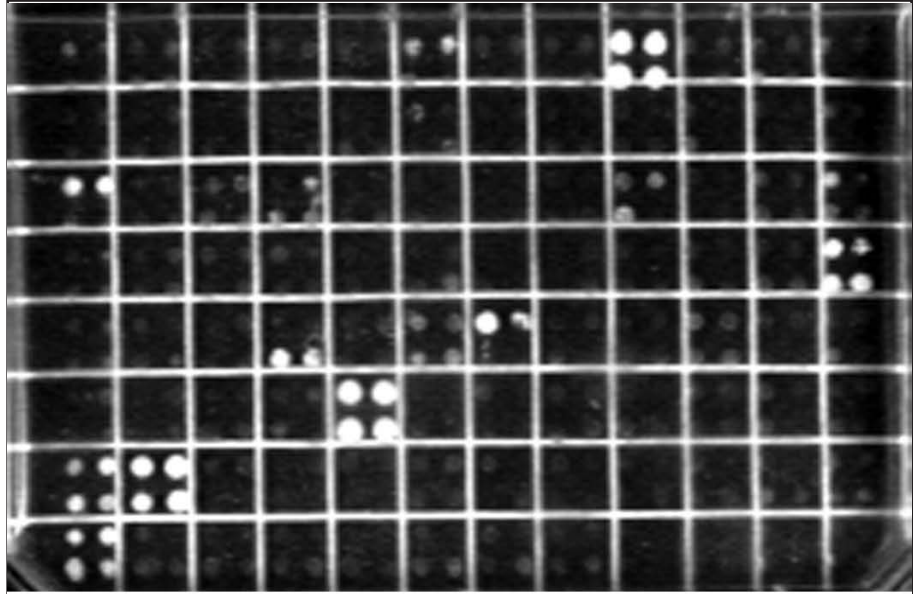

3 mM 3AT

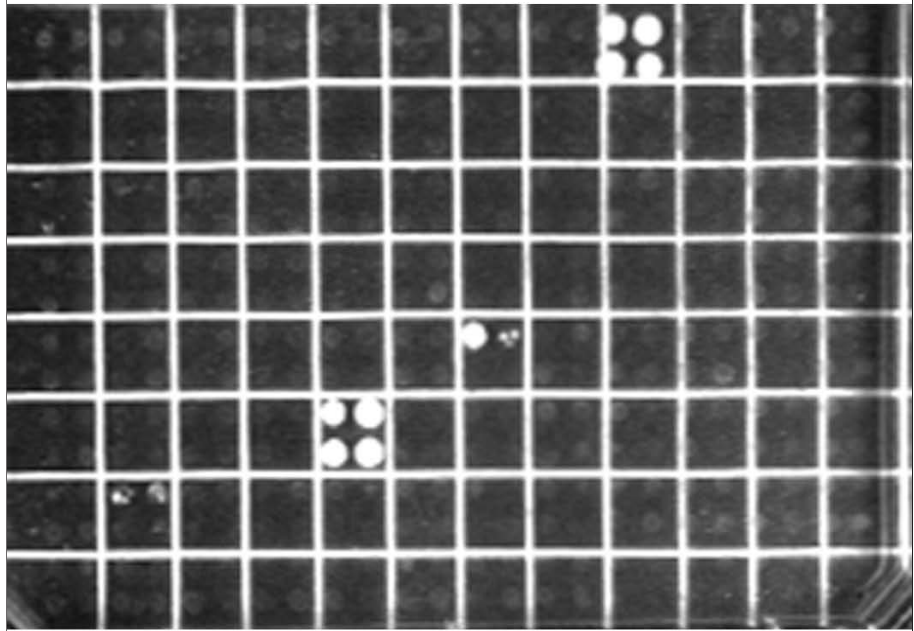

10 mM 3AT

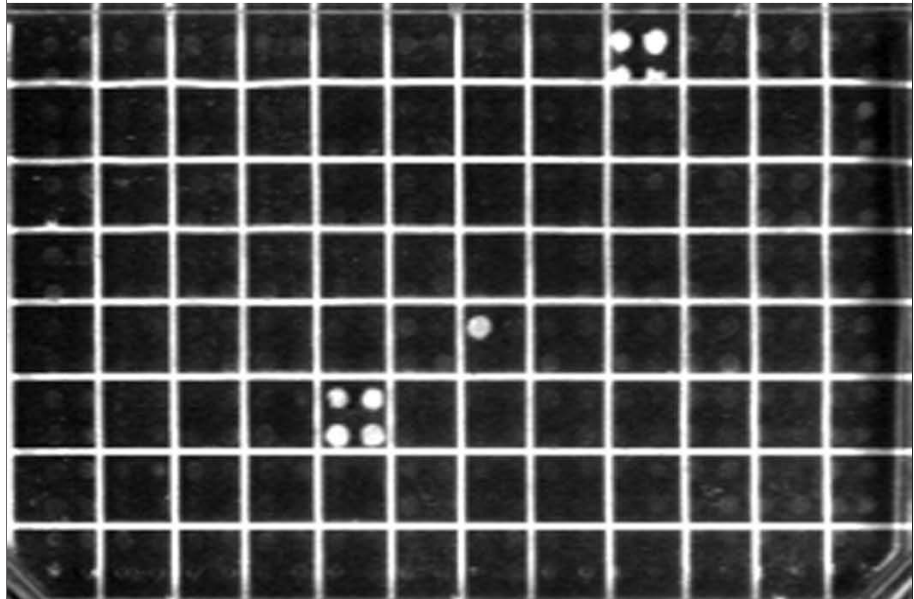

## Random reference set - Autoactivation tests

Baits: pGADCg

Preys: pGBKCg

(empty vector)

0 mM 3AT

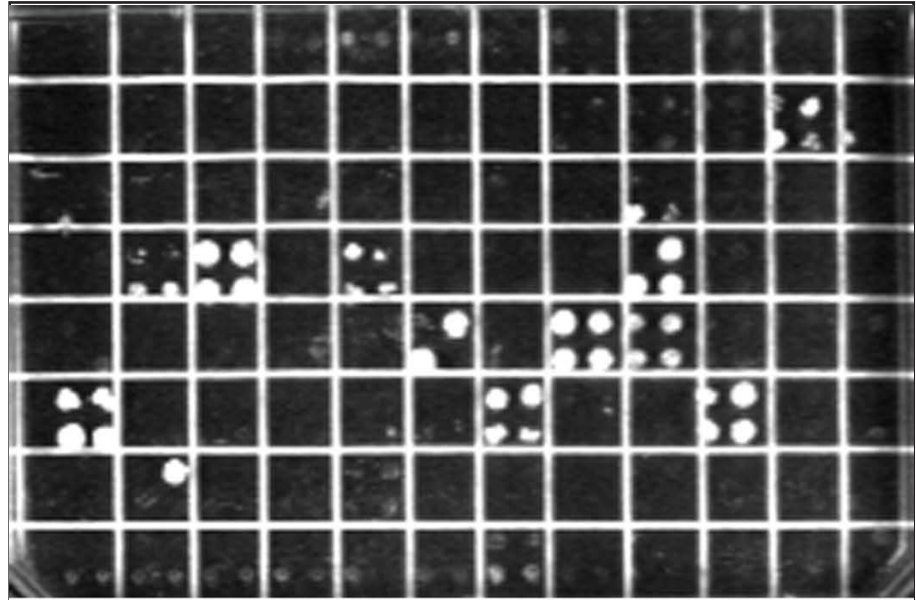

3 mM 3AT

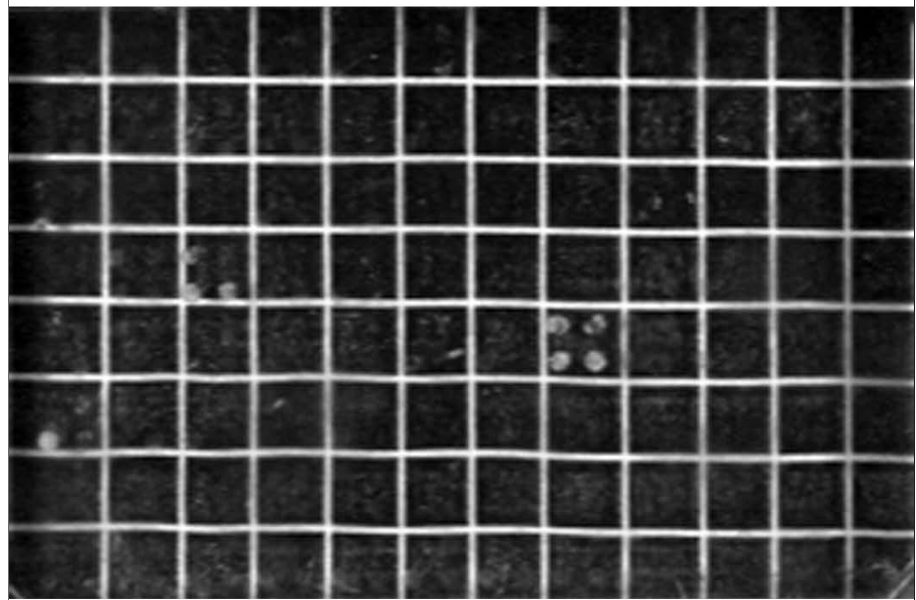

10 mM 3AT

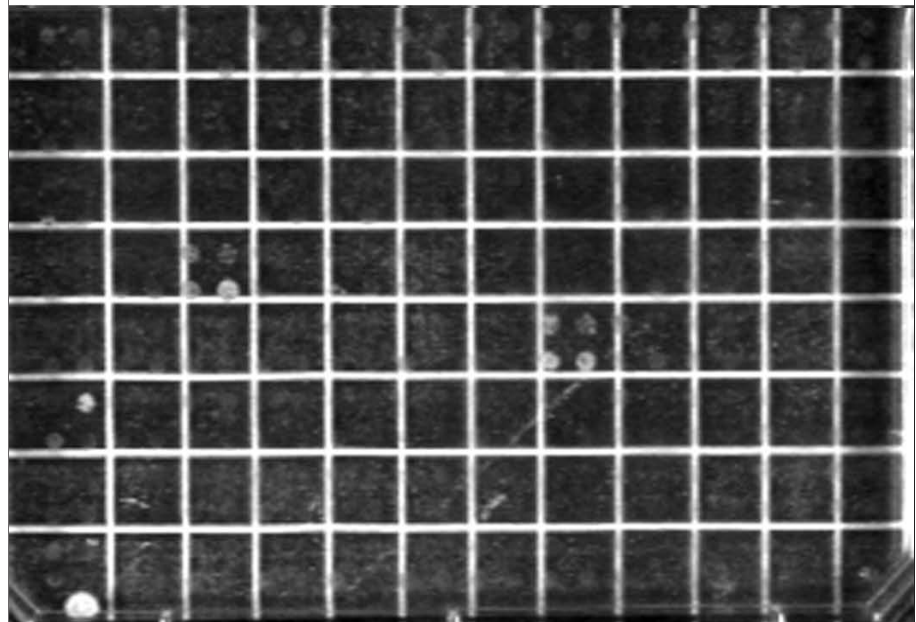

## Random reference set - Autoactivation tests

Baits: pGADCg

Preys: pGBKCg

(empty vector)

0 mM 3AT

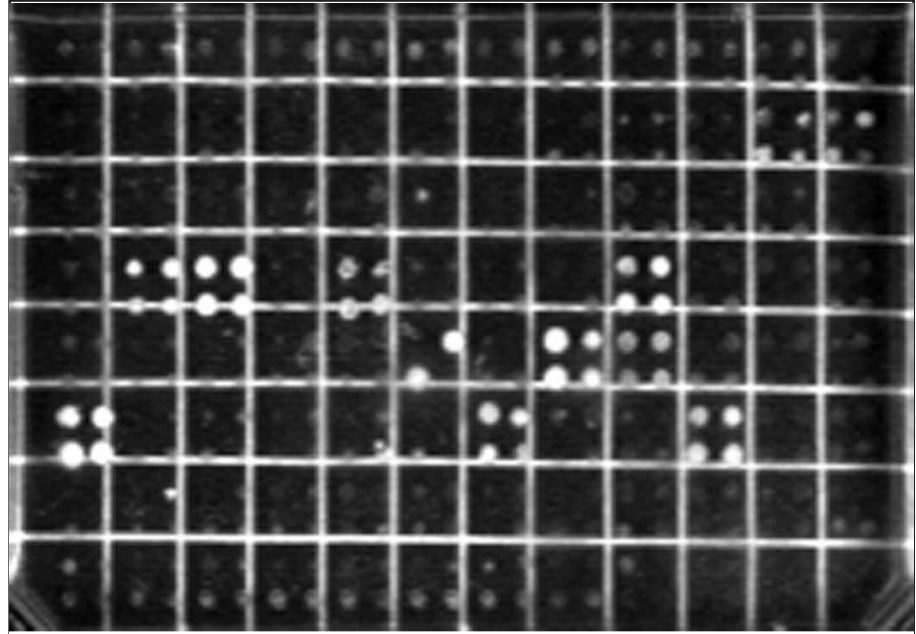

3 mM 3AT

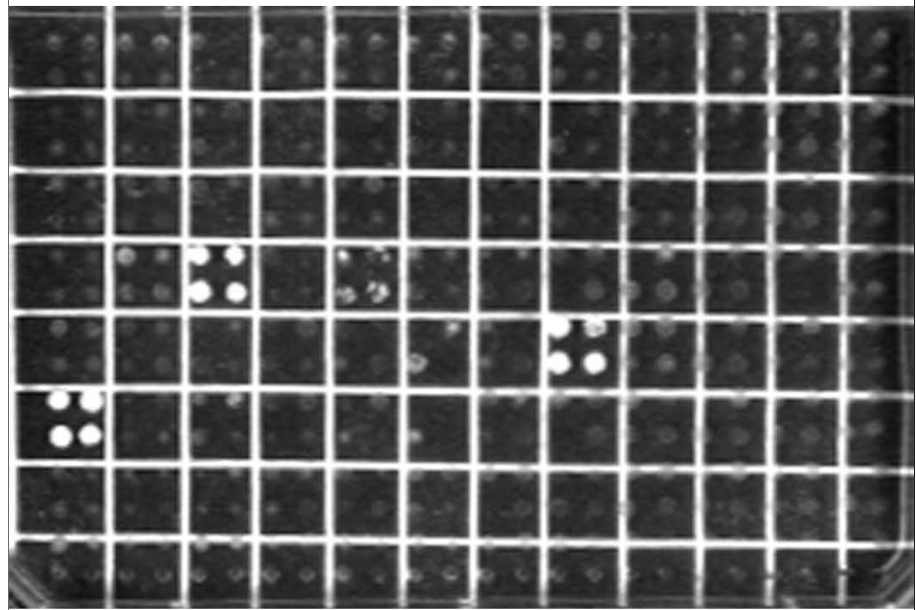

10 mM 3AT

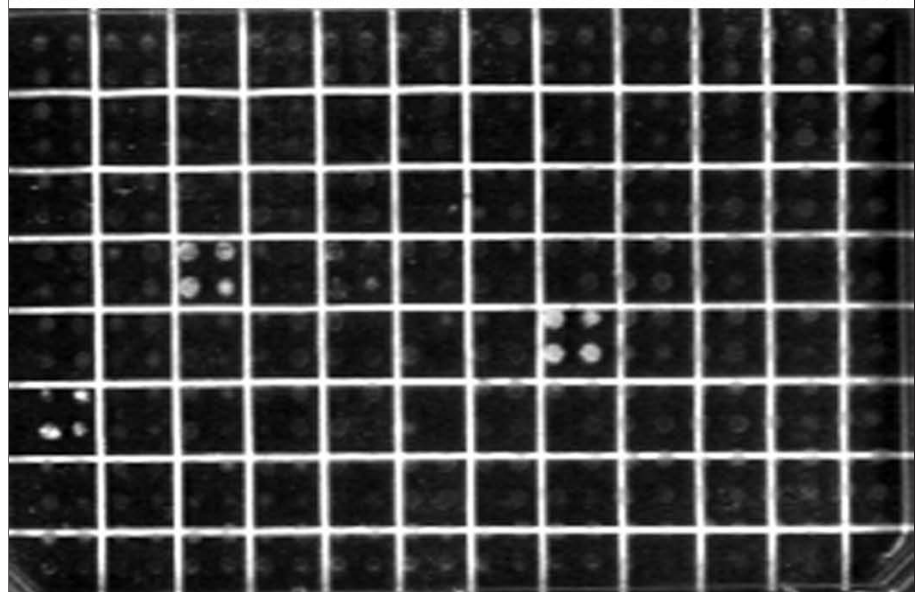

## Random reference set - Autoactivation tests

Baits: pGBGT7g

Preys: pGADCg

(empty vector)

0 mM 3AT

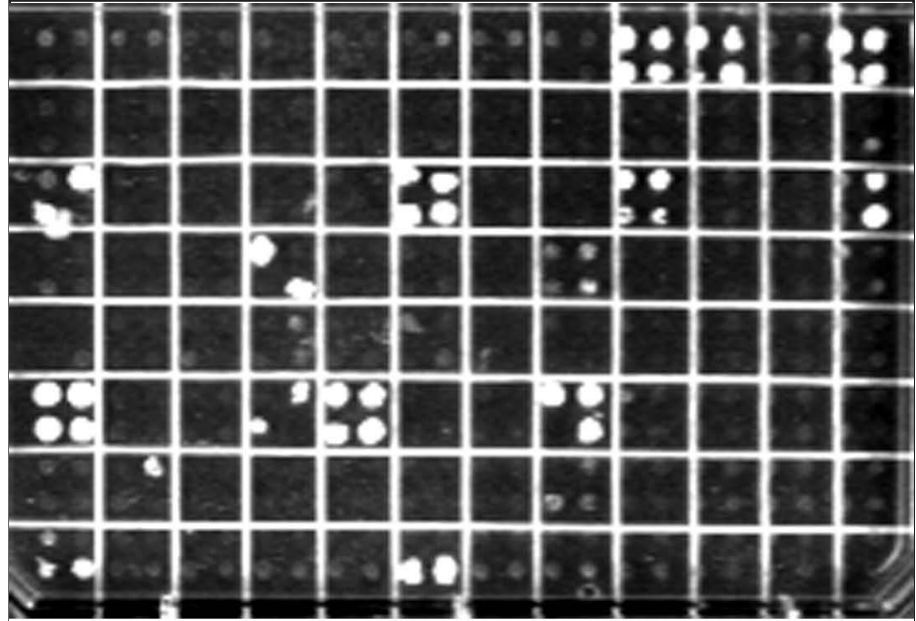

3 mM 3AT

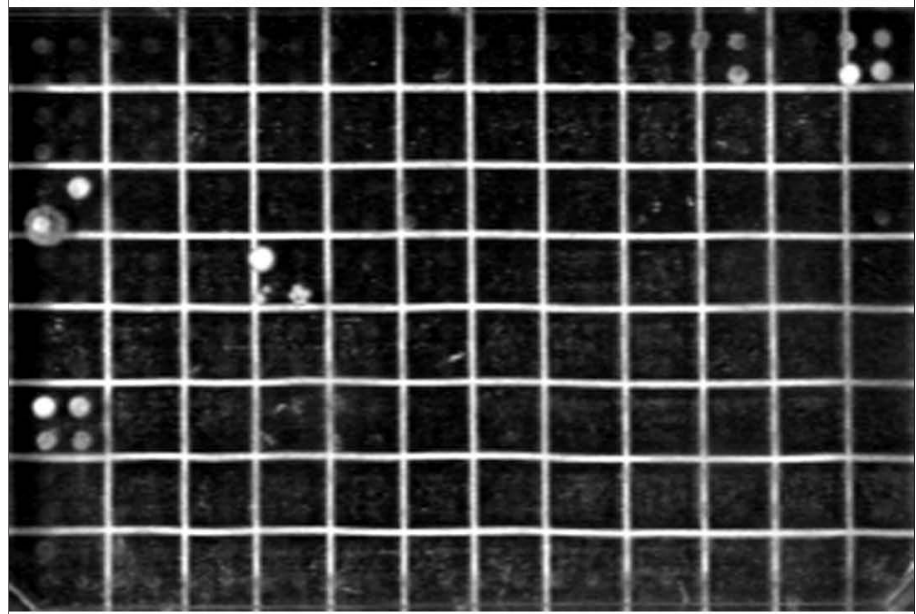

10 mM 3AT

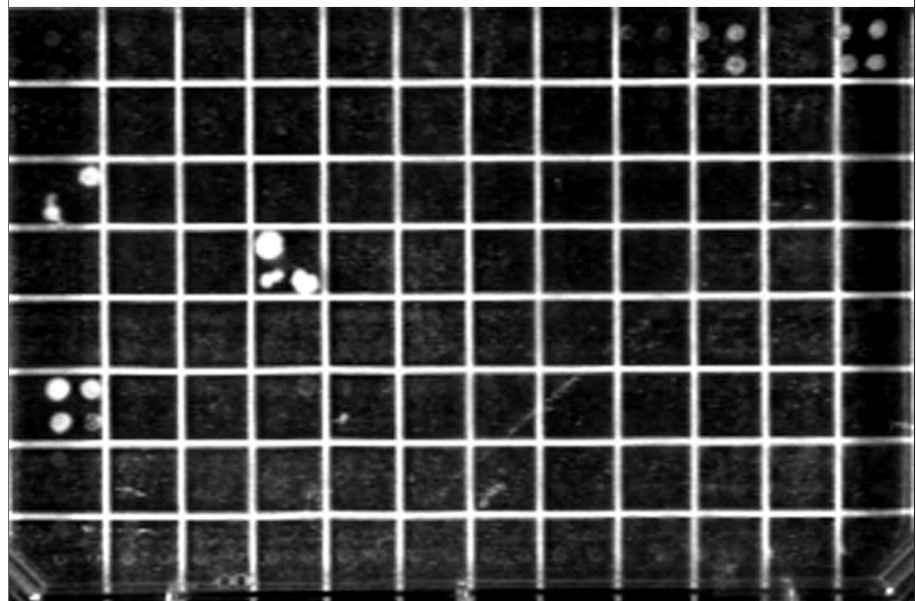

## Random reference set - Autoactivation tests

Baits: pGBGT7g

Preys: pGADCg  
(empty vector)

0 mM 3AT

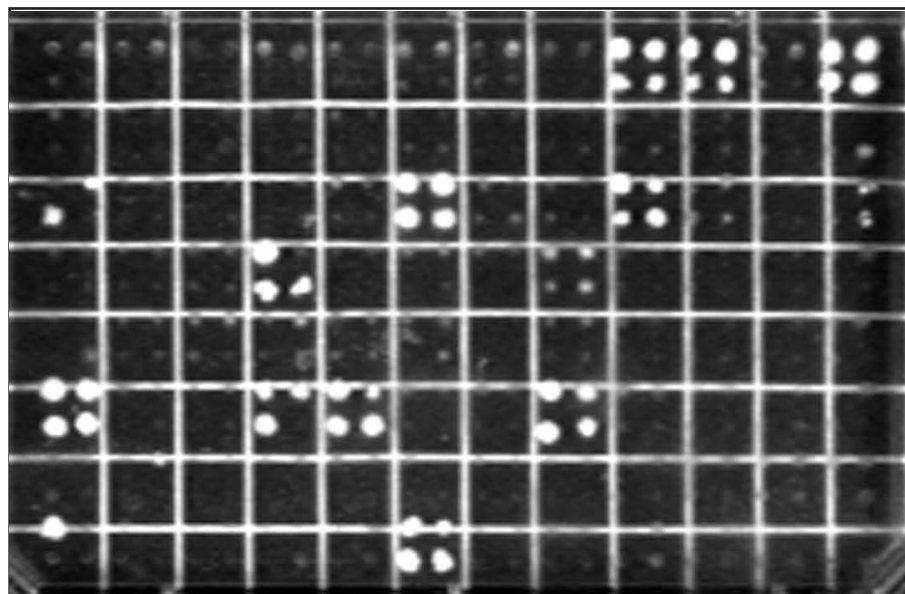

3 mM 3AT

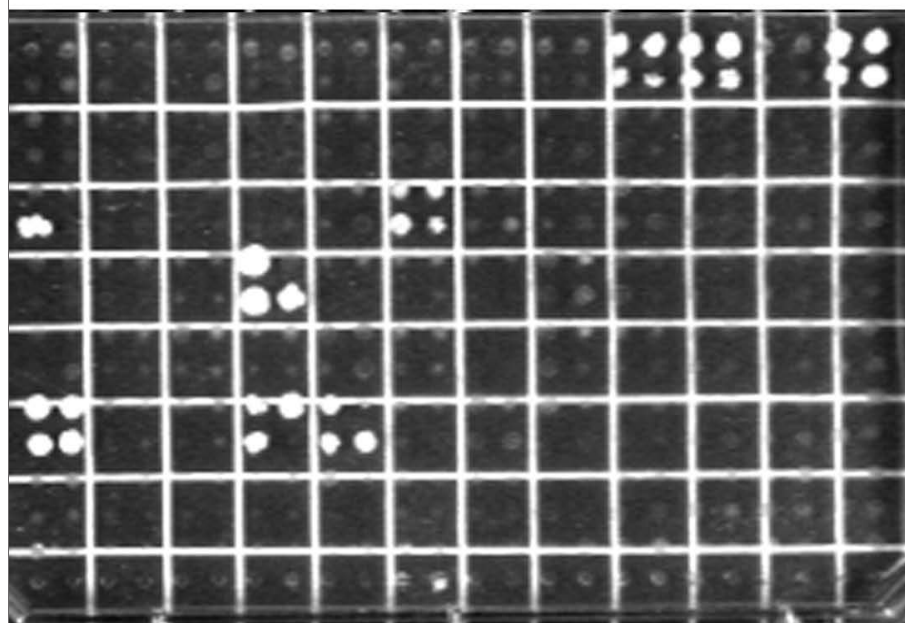

10 mM 3AT

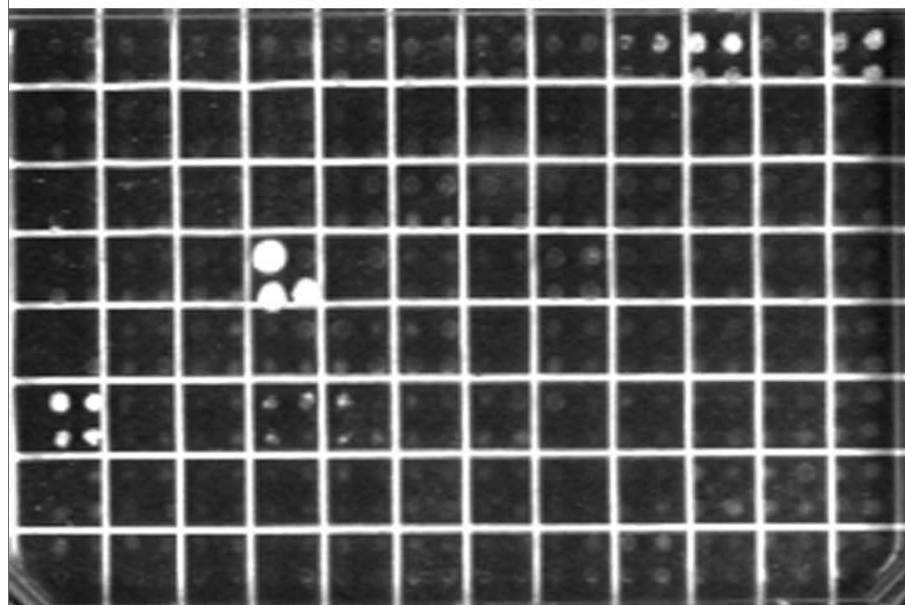

Random reference set - Autoactivation tests

Baits: pGADCg

Preys: pGBGT7g  
(empty vector)

0 mM 3AT

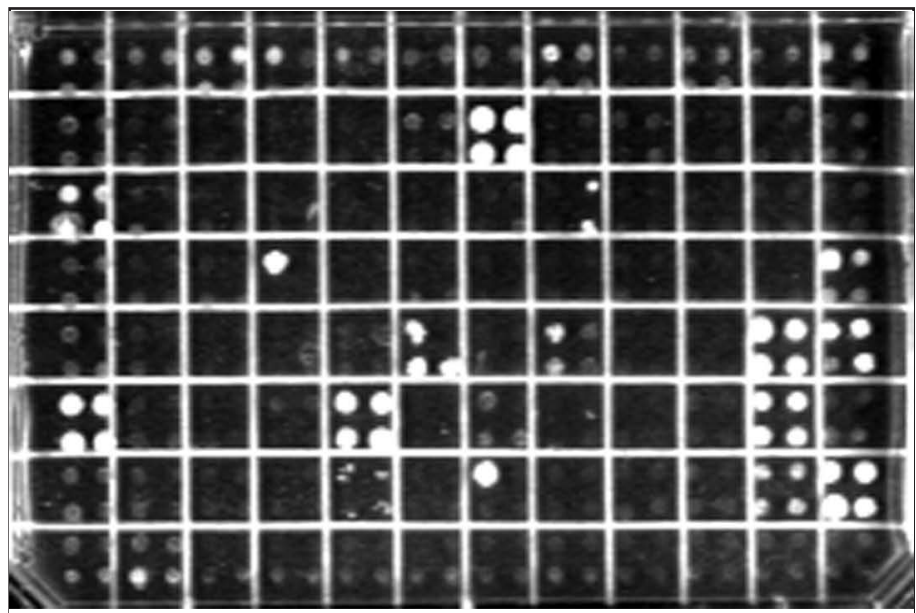

3 mM 3AT

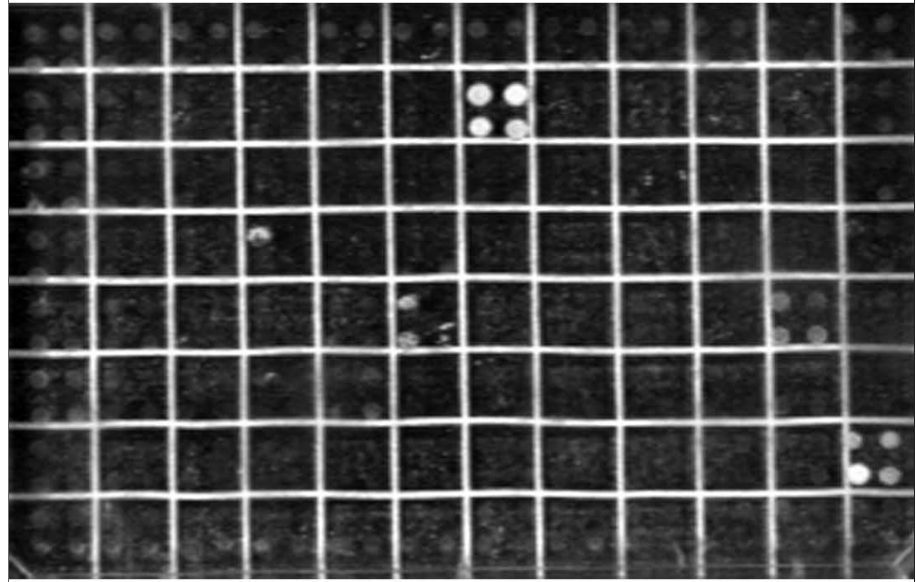

10 mM 3AT

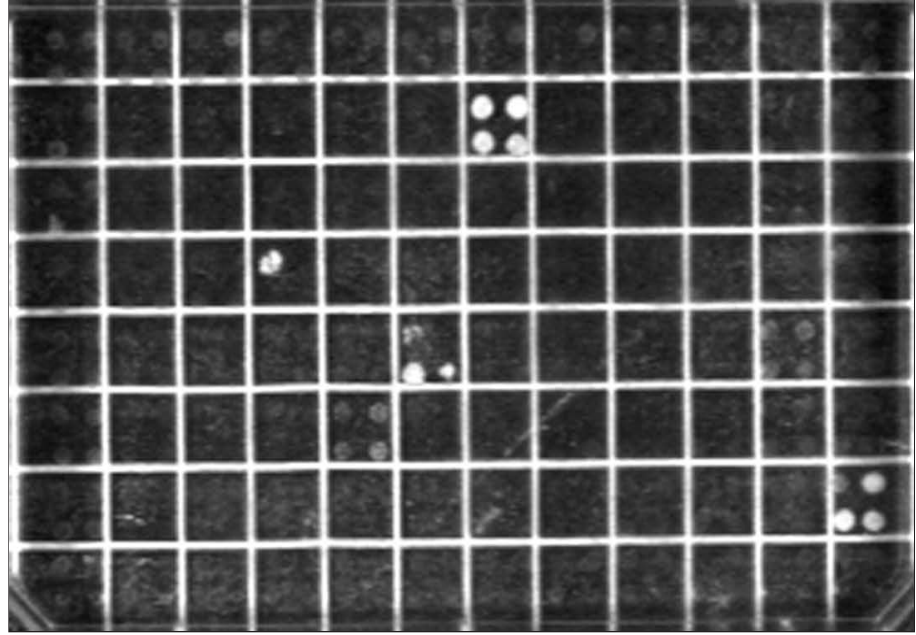

## Random reference set - Autoactivation tests

Baits: pGADCg

Preys: pGBGT7g  
(empty vector)

0 mM 3AT

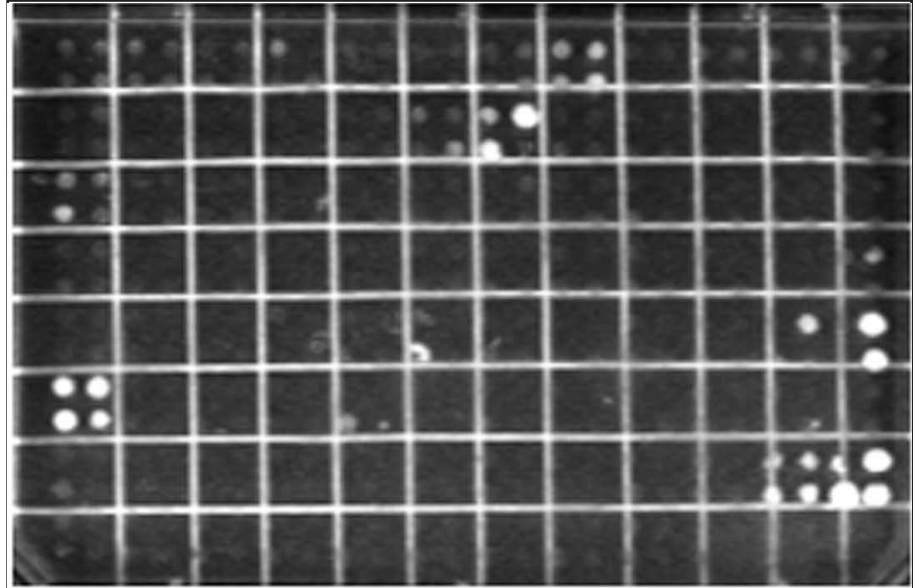

3 mM 3AT

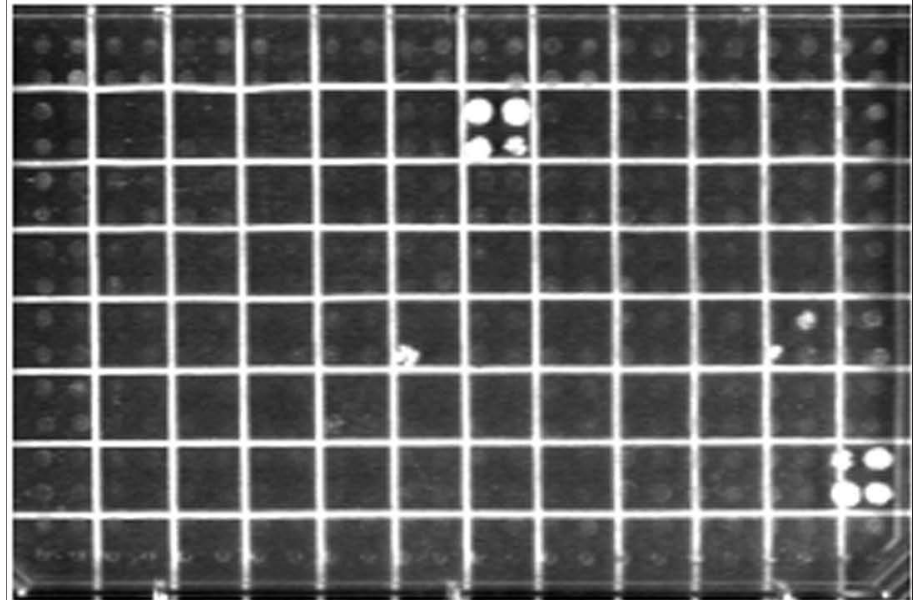

10 mM 3AT

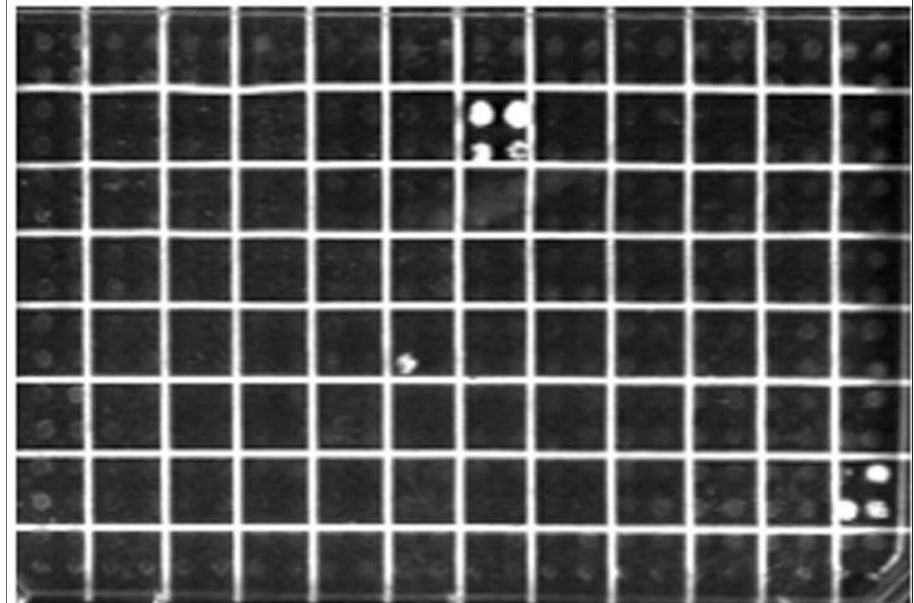



## Random reference set - Autoactivation tests

Baits: pGBKCg

Preys: pGADT7g  
(empty vector)

0 mM 3AT

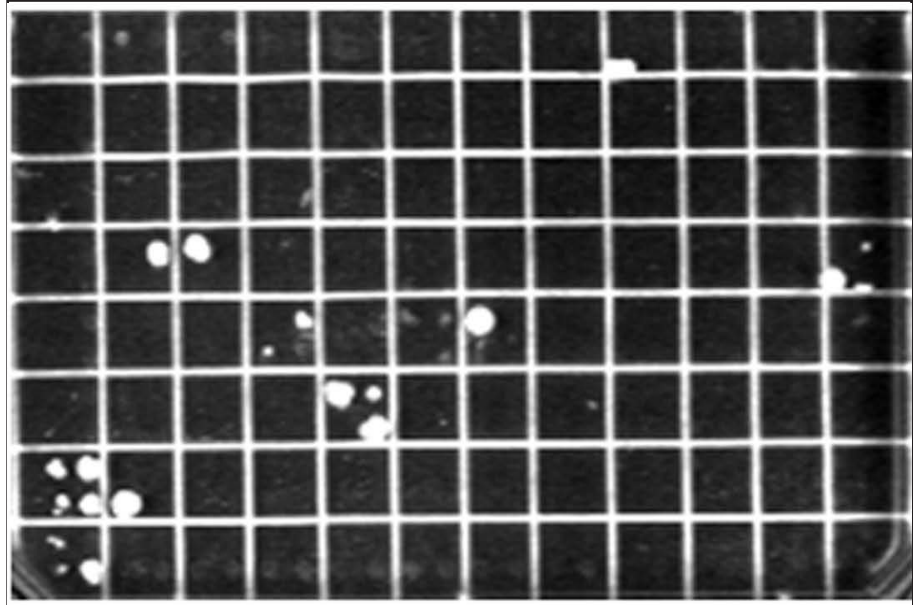

3 mM 3AT

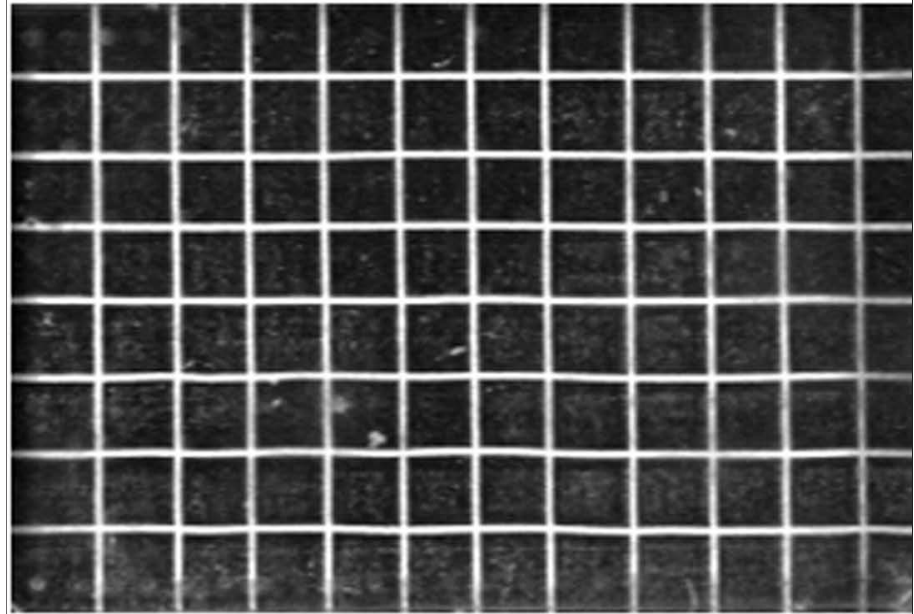

10 mM 3AT

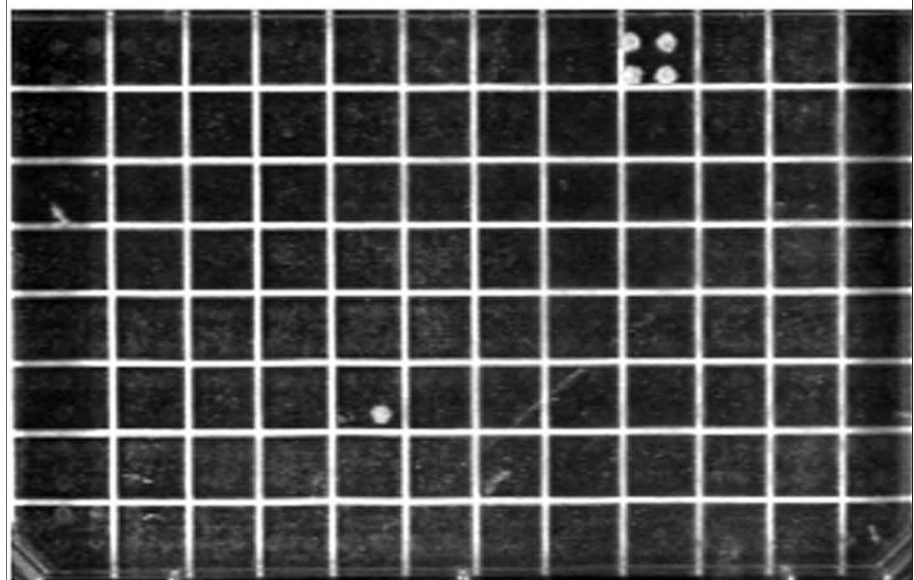

Random reference set - Autoactivation tests

Baits: pGBKcG

Preys: pGADT7g  
(empty vector)

0 mM 3AT

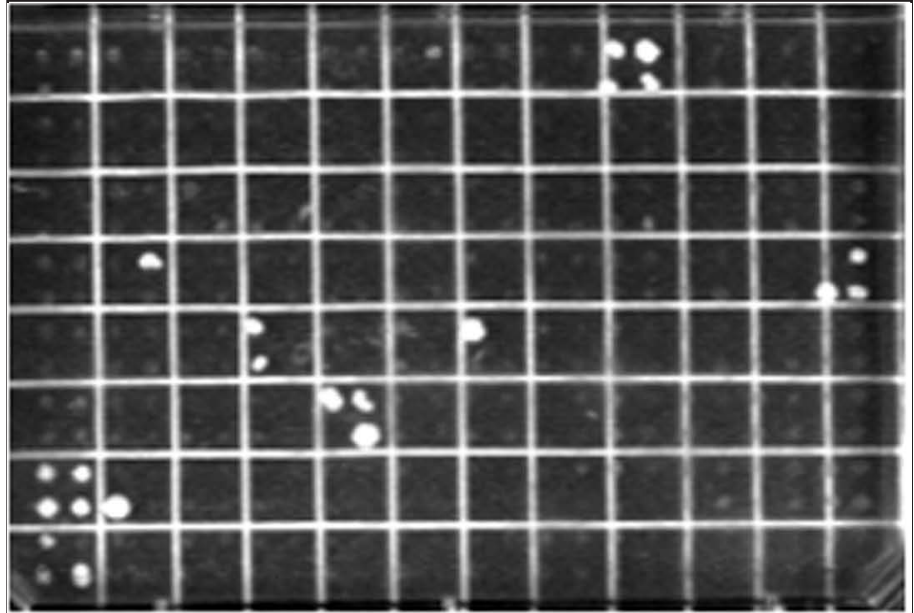

3 mM 3AT

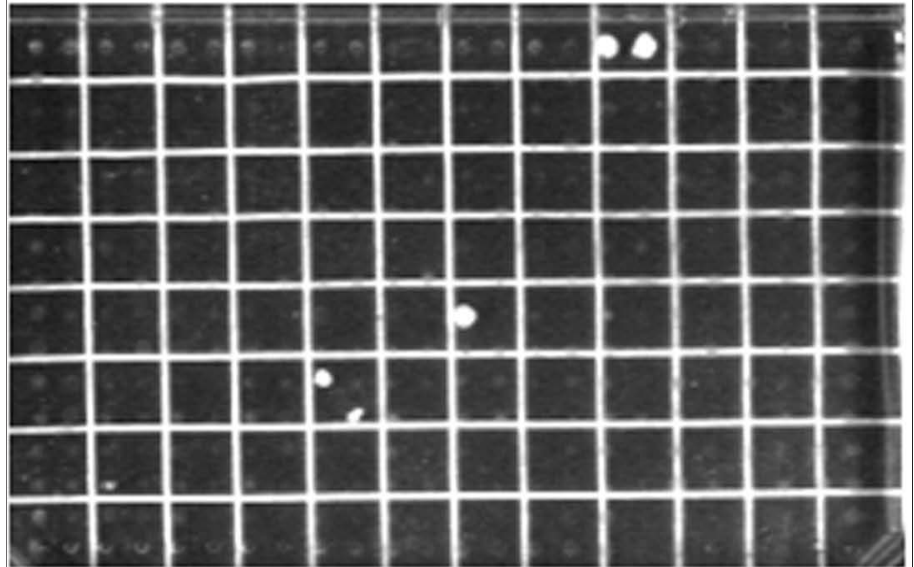

10 mM 3AT

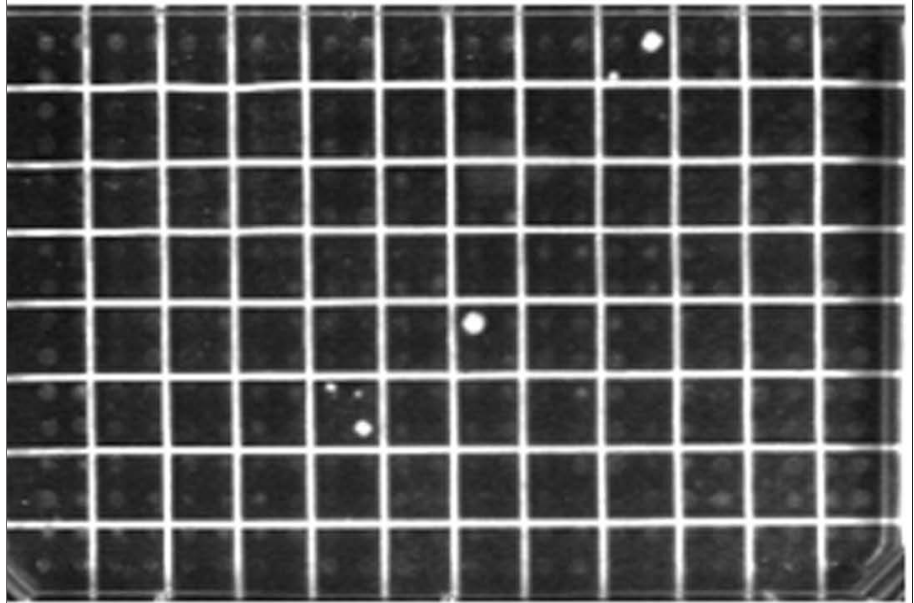

Random reference set - Autoactivation tests

Baits: pGADT7g

Preys: pGBKCg  
(empty vector)

0 mM 3AT

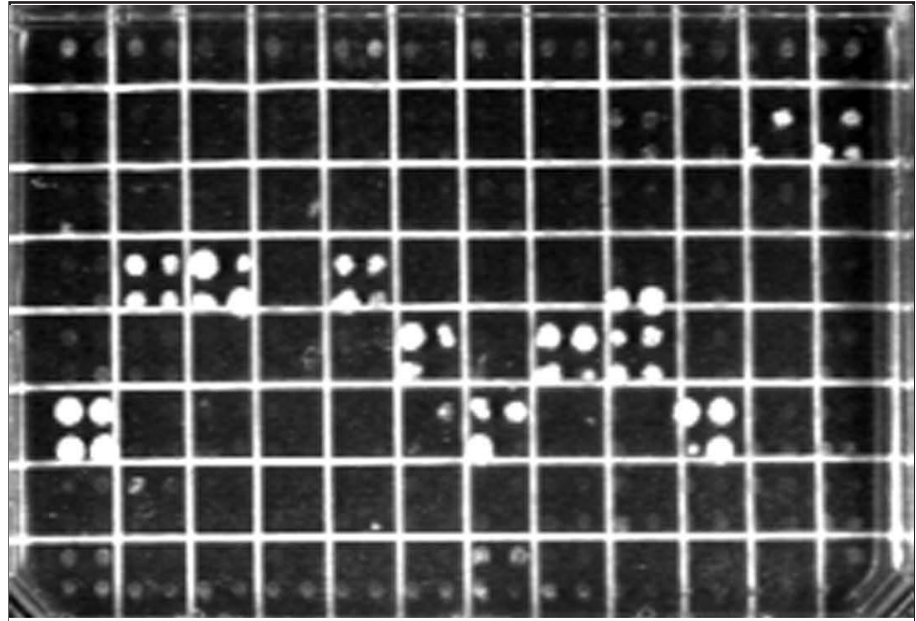

3 mM 3AT

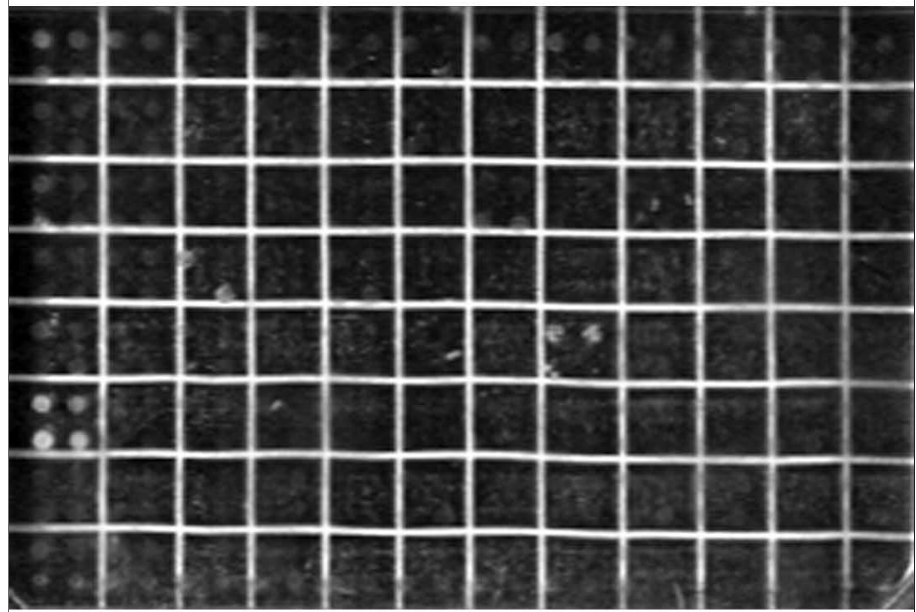

10 mM 3AT

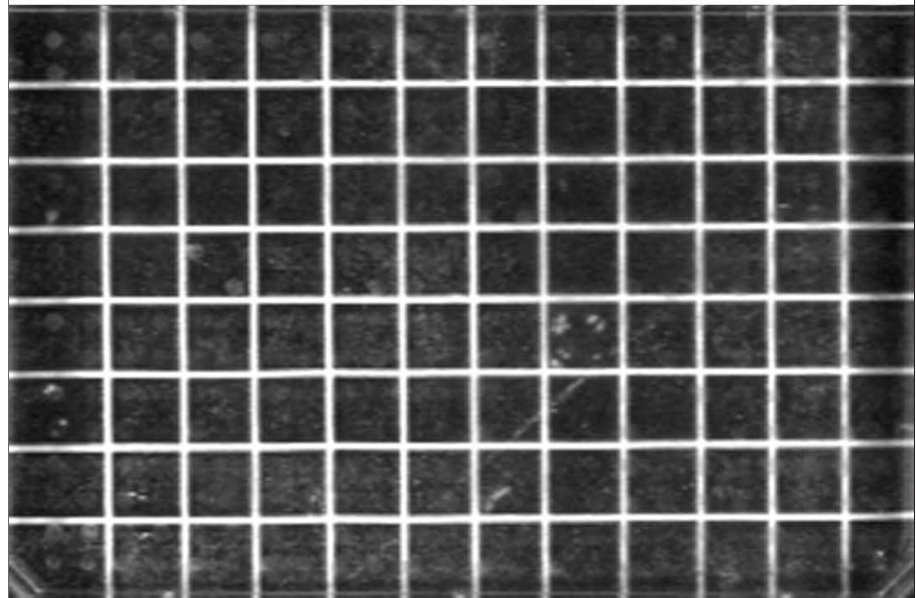

## Random reference set - Autoactivation tests

Baits: pGADT7g

Preys: pGBKCg  
(empty vector)

0 mM 3AT

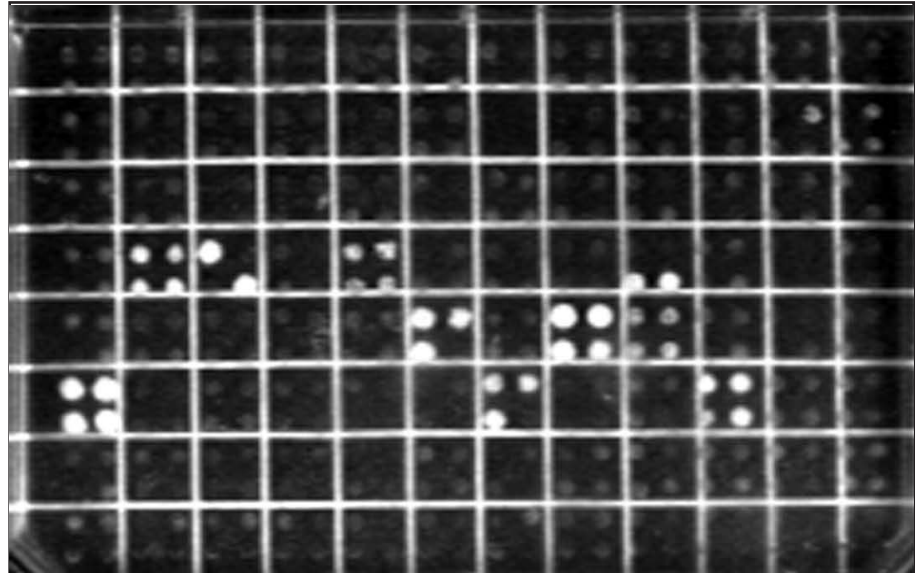

3 mM 3AT

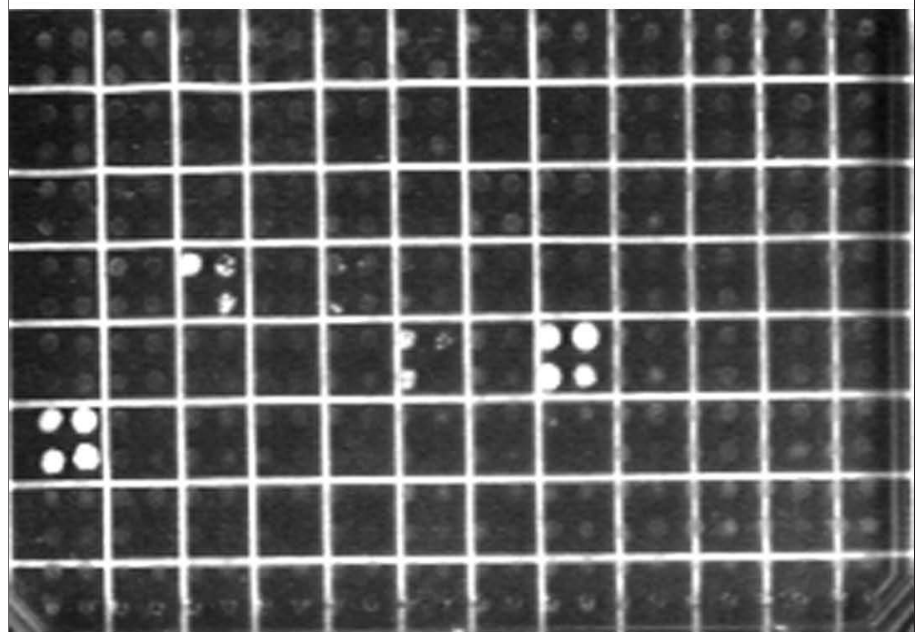

10 mM 3AT

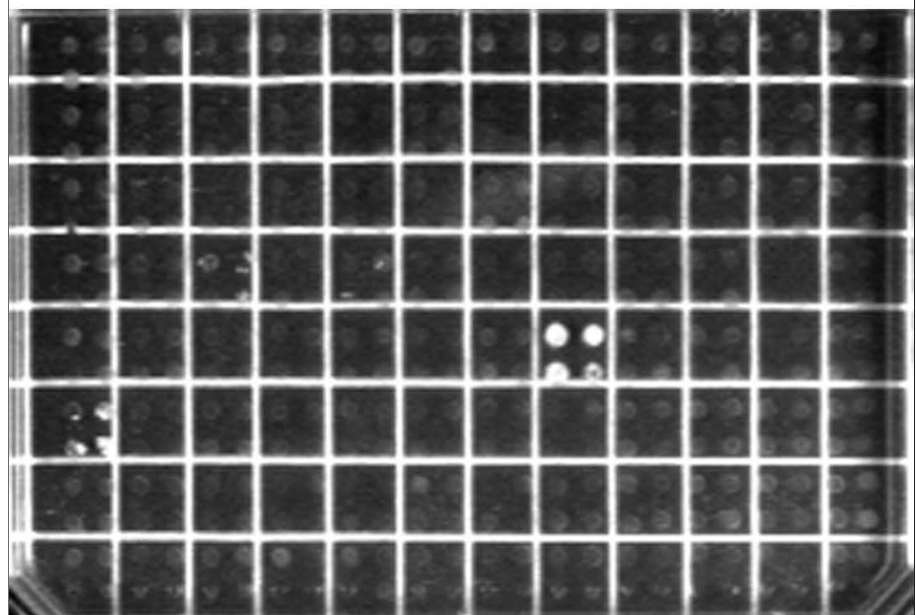

Supplement: NIHMS1907577-supplement-SI_data.pdf [file NIHMS1907577-supplement-SI_data.pdf]
